# Precision of Tissue Patterning is Controlled by Dynamical Properties of Gene Regulatory Networks

Katherine Exelby<sup>1\*</sup>, Edgar Herrera-Delgado<sup>1,2\*†</sup>, Lorena Garcia Perez<sup>1</sup>, Ruben Perez-Carrasco<sup>4</sup>, Andreas Sagner<sup>1</sup>, Vicki Metzis<sup>1</sup>, Peter Sollich<sup>2,3†</sup> and James Briscoe<sup>1†</sup>

<sup>1</sup>The Francis Crick Institute, 1 Midland Road, London, NW1 1AT, UK

<sup>2</sup>Department of Mathematics, King's College London, Strand, London WC2R 2LS, UK

<sup>3</sup>Institute for Theoretical Physics, Georg-August-University Göttingen,

Friedrich-Hund-Platz 1, 37077 Göttingen, Germany

<sup>4</sup>Department of Mathematics, University College London, Gower Street, London WC1E 6BT, UK

\*These authors contributed equally

†To whom correspondence should be addressed;

E-mail: edgar.herrera-delgado@crick.ac.uk; peter.sollich@uni-goettingen.de;  
james.briscoe@crick.ac.uk

## Abstract

**During development, gene regulatory networks allocate cell fates by partitioning tissues into spatially organised domains of gene expression. How the sharp boundaries that delineate these gene expression patterns arise, despite the stochasticity associated with gene regulation, is poorly understood. We show, in the vertebrate neural tube, using perturbations of coding and regulatory regions, that the structure of the regulatory network contributes to boundary precision. This is achieved, not by reducing noise in individual genes, but by the configuration of the network modulating the ability of stochastic fluctuations to initiate gene expression changes. We use a computational screen to identify network properties that influence boundary precision, revealing two dynamical mechanisms by which small gene circuits attenuate the effect of noise in order to increase patterning precision. These results highlight design principles of gene regulatory networks that produce precise patterns of gene expression.**

## 32 Introduction

33 Embryos are characterised by remarkably organised and reproducible patterns of cellular dif-  
34 ferentiation. An illustration of this accuracy are the sharp boundaries of gene expression ob-  
35 served in many developing tissues. These patterns are determined by gene regulatory networks  
36 (GRNs), governed by secreted developmental signals [Davidson, 2010], raising the question of  
37 how precision is achieved inspite of the biological noise and inherent stochastic fluctuations  
38 associated with the regulation of gene expression [Raser and O'Shea, 2005].

39 A popular metaphor for the process of developmental pattern formation is the Waddington  
40 landscape, in which the differentiation trajectory of a cell is conceived as a ball rolling down a  
41 landscape of bifurcating valleys [Waddington, 1957]. In this representation, the landscape is  
42 shaped by the GRN with the valleys representing cell fates and developmental signals allocating  
43 cell identity by determining the valley a cell enters. This can be formalised more rigorously by  
44 describing the GRN using dynamical systems theory such that Waddingtonian valleys corre-  
45 spond to the attractor states of the GRN [Enver et al., 2009, Wang et al., 2011, Balázsi et al.,  
46 2011, Zhou et al., 2012]. In this view, cells can be driven out of a valley into an adjacent  
47 attractor – thus producing a change in identity – not only by developmental signals but also  
48 by gene expression noise.

49 How is noise buffered in developing tissues to ensure that developmental signals generate  
50 precise and reproducible patterns of gene expression? For individual genes, the activity of re-  
51 dundant regulatory elements (so-called shadow enhancers), the 3D architecture of the genome,  
52 the presence of multiple alleles, and the effect of RNA processing have all been proposed to  
53 buffer fluctuations and increase the robustness of gene expression [Perry et al., 2010, Frankel  
54 et al., 2010, Lagha et al., 2012, Little et al., 2013, Battich et al., 2015, Cannavò et al.,  
55 2016, Dickel et al., 2018, Osterwalder et al., 2018, Paliou et al., 2019, Tsai et al., 2019]. At  
56 the level of the tissue, mechanisms that regulate the shape, steepness or variance of gradients  
57 have been explored and their effect on the precision of gene expression detailed [Bollenbach  
58 et al., 2008, Sokolowski et al., 2012, Tkačik et al., 2015, Zagorski et al., 2017, Lucas et al.,  
59 2018]. Several mechanisms, including differential adhesion, mechanical barriers and juxtacrine  
60 signalling, have been proposed to correct anomalies and enhance precision, once cellular pat-  
61 terning has been initiated [Xu et al., 1999, Standley et al., 2001, Rudolf et al., 2015, Dahmann  
62 et al., 2011, Addison et al., 2018]. In addition, theoretical studies have suggested that the  
63 structure and activity of GRNs can also affect precision [Chalancon et al., 2012, Lo et al.,  
64 2015, Perez-Carrasco et al., 2016]. However, experimental evidence to support this remains

65 elusive.

66 The developing vertebrate neural tube offers the opportunity to test the role of GRNs  
67 in the precision of patterning. The neural tube GRN partitions neural progenitors into dis-  
68 crete domains of gene expression arrayed along the dorsal-ventral axis [Sagner and Briscoe,  
69 2019]. The boundaries between these domains are clearly delineated and accurately positioned  
70 [Kicheva et al., 2014] resulting in sharp spatial transitions in gene expression that produce  
71 characteristic stripes of molecularly distinct cells. In the ventral neural tube, the secreted  
72 ligand Sonic Hedgehog (Shh), emanating from the notochord and floor plate, located at the  
73 ventral pole, controls the pattern forming GRN (Fig. 1A). The regulatory interactions between  
74 the transcription factors (TFs) comprising the GRN explain the dynamics of gene expression  
75 in the ventral neural tube and produce the genetic toggle switches that result in discrete tran-  
76 sitions in gene expression in individual cells [Balaskas et al., 2012]. The network includes the  
77 TFs Pax6, Olig2, Irx3 and Nkx2.2. Irx3 represses Olig2 [Novitch et al., 2001], while Nkx2.2  
78 is repressed by Pax6, Olig2 and Irx3 [Briscoe et al., 1999, Briscoe et al., 2000, Novitch et al.,  
79 2001, Balaskas et al., 2012]. In the absence of Shh signaling, progenitors express Pax6 and  
80 Irx3. Moderate levels of Shh signalling are sufficient to induce Olig2 expression and repress Irx3  
81 to specify motor neuron progenitors (pMN) [Ericson et al., 1997, Briscoe et al., 2000, Novitch  
82 et al., 2001, Balaskas et al., 2012]. In response to high and sustained levels of Shh signalling,  
83 Nkx2.2 is induced and inhibits the expression of Pax6 and Olig2, which then generates p3 pro-  
84 genitors and delineates the p3-pMN boundary (Fig. 1B). In embryos lacking Pax6, the domain  
85 of Nkx2.2 expression expands resulting in a decrease in Olig2 expression and dorsal shift in the  
86 p3-pMN boundary [Ericson et al., 1997, Novitch et al., 2001, Balaskas et al., 2012].

87 In addition to the change in the position of the p3-pMN boundary, the loss of Pax6 also  
88 results in decreased precision of the p3-pMN boundary with noticeably more intermixing of  
89 cells [Ericson et al., 1997, Briscoe et al., 2000, Novitch et al., 2001, Balaskas et al., 2012].  
90 Here we set out to understand what explains this loss of precision. We hypothesised that  
91 stochastic fluctuations in gene expression coupled with changes in the dynamics of the GRN in  
92 the absence of Pax6 account for the decreased boundary precision. We provide a combination  
93 of experiment, data analysis and theory that are consistent with this idea. We also found that  
94 perturbing the regulatory input onto Olig2, by deleting a single cis-regulatory element, altered  
95 the dynamics of the GRN and decreased the precision of the p3-pMN boundary. The decreased  
96 precision was not a result of increased noise in the expression of individual genes. Instead  
97 the absence of the Olig2 regulatory element, similar to the loss of Pax6, changed the overall  
98 configuration of the stochastic fluctuations and made transitions from a pMN to p3 state more

likely. A computational screen for networks that generate precise boundaries supported this idea and revealed two dynamical mechanisms by which small gene circuits attenuate the effect of noise in order to increase patterning precision. Thus, although mechanisms necessitating additional signals, differential adhesion or cell mechanics are often invoked to explain the precision of tissue patterning, our analysis suggests that the intrinsic properties of a GRN can also enhance boundary precision.

## Results

### **Pax6 contributes to p3-pMN boundary precision**

We assayed the precision of the boundary between p3 (Nkx2.2 expressing) and pMN (Olig2 and Pax6 expressing) in the ventral neural tube. Consistent with previous reports [Ericson et al., 1997, Balaskas et al., 2012], compared to wild-type (WT) mouse embryos, the precision of the boundary between p3-pMN domains was decreased in embryos lacking Pax6, resulting in more intermixing of cells expressing Olig2 or Nkx2.2 (Fig. 1C) [Ericson et al., 1997, Briscoe et al., 2000, Balaskas et al., 2012]. Measurements of the dorsal-ventral width of the region that contains both Nkx2.2 and Olig2 expressing cells in WT and Pax6 mutant embryos (Supplemental Section G.8) indicated that between e9.0 and e10.5, the width of the pMN-p3 boundary region is wider in Pax6<sup>-/-</sup> embryos, consistent with a loss of precision (Fig. 1E & S1).

We hypothesised that the decreased precision of the Nkx2.2 boundary, leading to the increased width in Pax6<sup>-/-</sup> embryos (Fig. 1C), could be explained by noise in gene expression in the GRN. Previously, we established a deterministic model of the GRN, based on coupled Ordinary Differential Equations (ODEs), that replicated the response of the network to Shh signalling and the shifts in boundary position in mutant embryos, including Pax6<sup>-/-</sup> [Panovska-Griffiths et al., 2013, Balaskas et al., 2012, Cohen et al., 2014]. This model recapitulated the pMN and p3 steady states. The analysis also produced a region of bistability in which both the pMN and p3 states were stable, however, due to the initial conditions and deterministic behaviour, the system always adopted a pMN state in the bistable region. We reasoned that fluctuations in gene expression could result in noise driven transitions within the bistable region from a pMN state to a p3 identity. (For a glossary of dynamical systems terminology see Supplemental Section B.) We constructed a stochastic differential equation (SDE) model that retained the parameters of the ODE model but incorporated a description of intrinsic gene expression fluctuations, based on experimental measurements (Supplemental Section C & D). Simulations with this model revealed that stochasticity in gene expression was sufficient to

131 promote a switch from a pMN state to a p3 identity within the bistable region and the  
132 probability of a noise driven transition increased with higher levels of signal as the system  
133 approached the p3 monostable regime. Moreover, the hysteresis that is a consequence of the  
134 bistability [Panovska-Griffiths et al., 2013, Balaskas et al., 2012, Cohen et al., 2014] meant  
135 that transitions from pMN to p3 were more frequent than the reverse.

136 We used the SDE model to simulate a Pax6<sup>-/-</sup> mutant. Compared to WT simulations, in  
137 the Pax6<sup>-/-</sup> mutant not only was the boundary of the Nkx2.2 expressing p3 domain displaced  
138 dorsally, but the boundary also showed markedly reduced precision (Fig. 1F,G,H). Thus, in-  
139 clusion of intrinsic noise in the GRN dynamics was sufficient to accurately reproduce the  
140 alterations in the position and precision of gene expression boundaries.

### 141 **An Olig2 enhancer influences boundary precision**

142 To test the hypothesis that the regulatory dynamics of the GRN affect the the precision of  
143 patterning we sought to alter the strength of interactions within the network. We turned  
144 our attention to the cis-regulatory elements controlling the TFs in the GRN, as regulatory  
145 elements have been shown to affect the reliability of patterning in other systems [Perry et al.,  
146 2011, El-Sherif and Levine, 2016]. Several predicted regulatory regions are located in the  
147 vicinity of Olig2; these include a prominent candidate region 33kb upstream of the Olig2  
148 gene [Oosterveen et al., 2012, Peterson et al., 2012], which we termed O2e33. This region  
149 binds (i) the repressor Nkx2.2; (ii) Sox2, which activates Olig2; and (iii) the Gli proteins, the  
150 transcriptional effectors of the Shh pathway (Fig. 2A) [Oosterveen et al., 2012, Peterson et al.,  
151 2012, Nishi et al., 2015, Kutejova et al., 2016] and becomes accessible in neural progenitors  
152 [Metzis et al., 2018]. To test the role of O2e33 in the network we first analysed its function  
153 *in vitro* in neural progenitors differentiated from mouse embryonic stem (ES) cells [Gouti  
154 et al., 2014]. Unlike WT cells, which express high levels of Olig2 at Day 5 of differentiation  
155 [Gouti et al., 2014, Sagner et al., 2018], cells in which the O2e33 enhancer had been deleted  
156 (O2e33<sup>-/-</sup>) had a marked reduction in levels of Olig2. By Day 6, Olig2 expression had  
157 increased in O2e33<sup>-/-</sup> cells, but the percentage of cells and the level of expression never  
158 reached that of WT (Fig. 2B,C). Consistent with the role of Olig2 in the generation of MNs,  
159 the production of MNs was substantially decreased in O2e33<sup>-/-</sup> cells (Fig. 2D).

160 We used the experimentally observed delay in Olig2 induction to identify changes in model  
161 parameters that mimic the effect of deleting the O2e33 enhancer (Supplemental Section E).  
162 Of the parameter sets that delayed Olig2 induction *in silico*, most predicted the generation of  
163 a smaller pMN domain, resulting from a ventral shift in the dorsal boundary. Strikingly, many

164 of the parameter sets also predicted a loss of boundary sharpness of the p3-pMN boundary.  
165 To test these predictions, we generated mutant mice lacking the O2e33 enhancer (Methods).  
166 Assaying the neural tube of embryos from these mice revealed lower Olig2 expression levels  
167 in pMN cells and a delay in the induction of Olig2 in O2e33<sup>-/-</sup> embryos compared to WT,  
168 in agreement with *in vitro* results (Fig. S2, S3). As predicted by the *in silico* analysis, the  
169 pMN domain was decreased in size in O2e33<sup>-/-</sup> embryos, with its dorsal limit of expression  
170 noticeably more ventrally positioned (Fig. 2E). Moreover, the boundary between the pMN  
171 and p3 domain was less precise than WT (Fig. 2E, F,G). Consistent with the reduced domain  
172 size, there was a significant reduction in the generation of MNs in O2e33<sup>-/-</sup> embryos and a  
173 concomitant increase in V2 neuron production (Fig. 2H,I). The decrease in the precision  
174 of the boundary, despite continued expression of Olig2 and Pax6 in pMN cells, suggests that  
175 secondary correction mechanisms do not suffice to determine the precision of the boundary  
176 between these two domains.

177 Using the *in vivo* observations we further constrained the parameter space of the model  
178 by restricting our analysis to parameter sets that generated an imprecise p3-pMN boundary  
179 and alter the position of the pMN-p2 boundary (Supplemental Section E). This produced  
180 simulations in which the loss of boundary precision in the O2e33<sup>-/-</sup> embryos is not as severe  
181 as the Pax6<sup>-/-</sup> phenotype, in line with the experimental data (Fig. 2J), and the width of the  
182 boundary and the size of the pMN domain were consistent with *in vivo* analysis (Fig. 2K-L).  
183 Taken together, the data suggest that Pax6 function and the activity of the O2e33 enhancer  
184 increase the precision of the p3-pMN boundary by attenuating the effects of gene expression  
185 stochasticity in the GRN.

## 186 **Rate of stochastic switching is controlled by GRN dynamics**

187 To understand the mechanism by which Pax6 and O2e33 contribute to boundary precision, we  
188 explored the dynamical properties of the SDE model. The model did not predict a difference  
189 in the magnitude of the fluctuations in the expression of individual genes between the WT  
190 and the Pax6 mutant (Supplemental Section C). Consistent with this, experimental measure-  
191 ments of the coefficient of variation (CV) of Olig2 from WT and Pax6<sup>-/-</sup> embryos did not  
192 reveal significant differences (Fig. 1I). This raised the possibility that, rather than the size of  
193 fluctuations in individual genes, the change in precision was a consequence of the regulatory  
194 interactions of the network. The model of the GRN predicts a bistable regime between the  
195 two steady states of Nkx2.2 (p3) and Olig2/Pax6 (pMN) (Fig. 3A) [Balaskas et al., 2012, Co-  
196 hen et al., 2014]. In the absence of noise, the transition between the two steady states is

197 determined solely by the level of Shh signalling. However, in the presence of intrinsic noise,  
198 fluctuations in gene expression can result in spontaneous transitions between pMN and p3  
199 identity within the bistable region [Perez-Carrasco et al., 2016]. Below a threshold of Shh  
200 signalling, the rate of transitions is very low and cells remain in the pMN state. Conversely,  
201 above a certain level of Shh signalling, transitions from the pMN to the p3 steady state take  
202 place so rapidly that almost all cells undergo this transition. In between these two regimes, a  
203 region of heterogeneity is observed in which there is an intermediate probability for each cell  
204 to spontaneous transition ( $\leq 50$  hours), see Fig. 3A-B. We calculated the characteristic time it  
205 would take for transitions between the pMN and p3 states at different dorsal-ventral positions  
206 of the neural tube. We termed this “fate jump time”. For WT, fate jump time changes rapidly  
207 in response to Shh signalling, implying that there is only a limited region where the effective  
208 probability of transitions is not 0 or 1 (Fig. 3B; black line). By contrast, the larger region of  
209 heterogeneity observed in the Pax6<sup>-/-</sup> mutant is due to the weaker dependence of fate jump  
210 time on levels of Shh signalling (Fig. 3B; blue line). There is a larger range of Shh levels for  
211 which noise driven transitions are possible and therefore a larger boundary region where cells  
212 in both p3 and pMN states exist.

213 Fate jump times changed more slowly for O2e33<sup>-/-</sup> than for WT (Fig. 3B), but more  
214 rapidly than for the Pax6<sup>-/-</sup> system. This is in line with the boundary precision of O2e33<sup>-/-</sup>  
215 embryos falling between that of WT and Pax6<sup>-/-</sup>. Analysis *in vivo* of the magnitude of the  
216 combined fluctuations in Pax6 and Olig2 indicated that it was similar in WT and O2e33<sup>-/-</sup>  
217 (Fig. 3C; Supplemental Section G.8). Consistent with this, the combined magnitude of fluc-  
218 tuations of Pax6 and Olig2 in simulations were similar in WT and O2e33<sup>-/-</sup> mutants. This  
219 suggested that, similar to Pax6<sup>-/-</sup> embryos, the decreased precision was not the result of an  
220 increase in the overall magnitude of fluctuations (Fig. S9)(Fig. 3D). In addition, simulations of  
221 the O2e33<sup>-/-</sup> mutant predicted that variability in Olig2 should increase whereas the variability  
222 of Pax6 should decrease. In agreement with this, the CV of Olig2 and Pax6 between WT and  
223 O2e33<sup>-/-</sup> *in vivo* were increased and decreased, respectively (Fig. 3E).

## 224 **The dynamical landscape determines boundary precision**

225 To investigate the reasons for the change in fate jump time in O2e33<sup>-/-</sup> and Pax6<sup>-/-</sup> mutants,  
226 we explored the effect of these perturbations on the dynamical landscape of the system (see  
227 Supplemental Section B). Transitions between p3 and pMN states involve the system passing  
228 through, or very close to, a point in gene expression space - the saddle point in the dynamical  
229 landscape - that is characterised by specific levels of the transcription factors (TFs), we refer to

230 this as the "transition point" (Fig. 4A-C; purple point). In the landscape analogy it represents  
231 the lowest point in the ridge that separates the p3 and pMN valleys (Fig. 4A). Simulations  
232 of the SDE model indicated that intrinsic fluctuations around the pMN state are initially  
233 directed away from the transition point in WT. By contrast, in the Pax6 mutant fluctuations  
234 are oriented directly towards the transition point. As a consequence, fluctuations of the same  
235 magnitude would be more likely to reach the transition point in Pax6<sup>-/-</sup> than WT cells. To  
236 characterise this rigorously, we calculated the most likely gene expression trajectory that a  
237 stochastic transition caused by fluctuations in gene expression will take between the pMN  
238 and p3 steady states. This path is obtained as the minimum of an "action functional" -  
239 the minimum action path (MAP, see Supplemental Section B). It provides a portrait of the  
240 dynamical landscape underlying a noise induced transition and is an analytical representation  
241 of the behaviour that can be observed in simulations (Fig. 4A & Supplemental Section C)  
242 [Perez-Carrasco et al., 2016, Kleinert, 2009, Bunin et al., 2012]. Consistent with the SDE  
243 simulations, in WT, the MAP from the pMN to p3 steady state does not follow the shortest  
244 route leading to the transition point. Instead, the levels of Pax6 drop rapidly and pitch away  
245 from the transition point, resulting in a curvature of the gene expression path between steady  
246 states (Fig. 4B). By contrast, in the absence of Pax6, the MAP is directly oriented towards  
247 the transition point (Fig. 4C). Taken together, the analysis suggests that the GRN affects the  
248 precision of a domain boundary by determining the dynamical landscape, without changing  
249 the level of noise in overall gene expression.

250 For the O2e33<sup>-/-</sup> mutants the MAP from pMN to p3 curved away from the shortest  
251 path to a lesser extent than for the WT; stochastic simulations further confirm this behaviour  
252 (Fig. 4D,E). Thus, in the absence of the O2e33 enhancer, stochastic fluctuations around  
253 the pMN steady state tended to take the system closer to the transition point than similar  
254 magnitude fluctuations in WT, making a noise driven switch in fate more likely in the mutant.  
255 Nevertheless, the curvature in the path in the O2e33<sup>-/-</sup> system was greater than in the  
256 Pax6<sup>-/-</sup> system, providing an explanation for the greater imprecision in Pax6<sup>-/-</sup> embryos  
257 compared to the O2e33<sup>-/-</sup> mutant (Fig. 4B-E).

258 To explore this phenomenon further, we calculated the action along the path for each  
259 genotype [de la Cruz et al., 2018](Fig. 4F & Supplemental Section C). This represents the  
260 effective energy required to reach a point along the transition path and is a measure of the  
261 extent of the barrier that has to be overcome for a fate transition. Consistent with the results  
262 of the simulations, the effective energy necessary for a noise induced transition was greatest for  
263 WT, less for O2e33<sup>-/-</sup>, and lowest for the Pax6<sup>-/-</sup> mutant. Moreover, the analysis indicated



264 that the initial part of the trajectory presented a more significant barrier to noise induced  
265 transitions in the WT than  $O2e33^{-/-}$  and  $Pax6^{-/-}$  mutants (Fig. S6A), corresponding to the  
266 relative divergences of their transition trajectories from the shortest route to the transition  
267 point.

268 An experimental testable signature of the alteration in the dynamical landscape in  $O2e33^{-/-}$   
269 mutants would be changes in the relative expression levels of Olig2 and Pax6 in individual cells.  
270 In cells close to the pMN-p3 boundary  $O2e33^{-/-}$  mutants are predicted to have higher levels  
271 of Pax6 and lower levels of Olig2 than WT (Fig. 4G,H). We therefore compared single cell  
272 immunofluorescence in the boundary region of WT and  $O2e33^{-/-}$  embryos (Fig. 4I,J & Sup-  
273 plemental Section G.8). Consistent with the predictions,  $O2e33^{-/-}$  mutants had higher levels  
274 of Pax6 and lower levels of Olig2 than WT. Thus the experimental evidence supports the idea  
275 that the strength of regulatory interactions encoded in the GRN contributes to the precision  
276 of domain boundaries by configuring the dynamical landscape of the system to reduce the  
277 likelihood of a stochastic fluctuation resulting in a noise driven change in cell identity.

## 278 **A computational screen identifies mechanisms for precise boundaries**

279 To ask whether other mechanisms could affect boundary precision, we performed a compu-  
280 tational screen to identify three node networks capable of generating a sharp boundary in  
281 response to a graded input (Fig. 5A & Supplemental Section F). For the networks recovered  
282 from the screen, we compared the boundary precision with the extent the MAP deviates from  
283 the shortest path to the transition, a quantity that we refer to as "curvature" (Supplemental  
284 Section F). This showed a positive correlation, consistent with our observations in the WT  
285 network, of high curvature and low boundary width. This correlation supports the idea that  
286 the shape of the transition pathway contributes to boundary precision (Fig. 5C). Nevertheless,  
287 for any given level of boundary sharpness, there were a range of MAP curvature values. We  
288 therefore investigated additional features that might affect boundary precision. We found a  
289 subset of the networks do not rely on path curvature to achieve precision and instead func-  
290 tioned effectively as two node networks (Fig. 5D). For these networks, the major contributor  
291 to boundary precision was the rate at which the steady state and transition point separated in  
292 response to changes in level of the input signal: the higher the rate of separation, the sharper  
293 the boundary (Fig. 5B). We termed this "separation speed". The most precise boundaries were  
294 generated by networks that exploited both separation speed and curvature, which includes the  
295 Pax6-Olig2-Nkx2.2 network (Fig. 5E-F).

296 Finally, we assessed whether particular network topologies favoured boundary sharpness.

297 Many topologies were able to generate sharp boundaries (Fig. 5G,H & Supplemental Sec-  
298 tion F), but four topologies appeared to be most effective (Fig. 5H). These tended to have  
299 similar separation speeds but much higher curvature than the networks with other topologies  
300 (Fig. S17). Crucial for this behaviour was the inhibition of  $x_3$  by  $x_2$  and the absence of  
301 repression of  $x_2$  by  $x_3$  (Fig. 5G & S16). This regulatory configuration generates curvature  
302 by allowing a steep decrease in  $x_3$ , while sustaining high levels of  $x_2$  prior to the transition.  
303 Hence, an understanding of the dynamical properties of the GRN offers an explanation for its  
304 structure and the resulting gene expression behaviour that determines tissue patterning.

## 305 Discussion

306 In this study we provide evidence that the spatial heterogeneity that results from the stochastic-  
307 ity of gene expression can be attenuated by the dynamics of the GRN to enhance the precision  
308 of gene expression in developing tissues. This mechanism does not rely on suppressing stochas-  
309 tic fluctuations in individual genes, nor on cell-to-cell communication, but instead configures  
310 the dynamical landscape of the regulatory network to increase the fidelity of decision making.  
311 This strategy - “precision by design” - highlights the capacity of gene regulatory circuits to  
312 contribute to robust tissue patterning and identifies a mechanism that might be exploited in  
313 other biological settings requiring precise responses from groups of cells.

### 314 GRN dynamics contribute to precise boundaries without attenuating gene expression 315 noise

316 Molecular noise is a universal feature of gene expression [Raj and van Oudenaarden, 2008,  
317 Raser and O’Shea, 2005, Chalancon et al., 2012]. Despite this, patterns of gene expression  
318 in developing tissues are remarkably reproducible and precise, as exemplified by the sharp  
319 boundaries of gene expression that delimit distinct domains of cells in many tissues. This  
320 spatial precision is critical for the accurate assembly of tissues. For example, along the anterior-  
321 posterior axis of the *Drosophila* embryo the expression of genes that partition the blastoderm  
322 into the major elements of the body axis are positioned with an accuracy of 1% or better  
323 [Dubuis et al., 2013, Petkova et al., 2019]. Similarly, in the central nervous system the  
324 correct positioning of different neuronal subtypes is a major determinant of their subsequent  
325 patterns of connectivity and underpins the formation of functional neural circuits [Jessell et al.,  
326 2011, Balaskas et al., 2019].

327 Mechanisms involving cell-cell interactions to correct initial imprecisions in the spatial  
328 organisation of tissues have received considerable attention [Xu et al., 1999, Standley et al.,

2001, Rudolf et al., 2015, Dahmann et al., 2011, Addison et al., 2018]. Differential cell adhesion between neural progenitors with different cellular identities has been proposed to refine initially disordered patterns [Lei et al., 2004, Xiong et al., 2013, Tsai et al., 2020]. However, neither differential adhesion nor cell sorting appear to be the sole explanation for the precision of patterning in the neural tube. Lineage tracing in the mouse and chick neural tube [Kicheva et al., 2014, Leber and Sanes, 1995] indicates that sister cells form contiguous clones and there is no evidence that clones at a domain boundary behave in a way compatible with differential interactions across a boundary. Moreover, in both *Pax6*<sup>-/-</sup> and *O2e33*<sup>-/-</sup> mutants neural progenitors with distinct identities, pMN and p3, producing MNs and V3 neurons respectively, continue to be generated, but these different progenitor types intermix to a greater extent than normal. If the differential expression of cell adhesion molecules or different mechanical properties explained the sharpness of the boundary between pMN and p3 cells, this would lead to the sorting of pMN and p3 cells in the mutant embryos. Nevertheless, cell adhesion might play a role in the neural tube of teleosts [Xiong et al., 2013, Tsai et al., 2020]. Unlike the epithelial neural tube of amniotes, the zebrafish neural tube initially comprises unpolarised non-epithelial cells and sister cells disperse widely, including contralaterally, in the neural tube. This raises the possibility that differential cell adhesion plays a more important role in the anamniote neural tube.

Similar to many developing tissues, the neural tube is patterned by graded signals that are transformed into discrete cell identities by the downstream GRN acting as a series of toggle switches to produce discontinuous changes in cell identity across the tissue [Sagner and Briscoe, 2019]. Previous studies have explored how properties of extracellular patterning signals [Bollenbach et al., 2008, Tkačik et al., 2015, Lucas et al., 2018, Sokolowski et al., 2012, Zagorski et al., 2017] and features of the regulation of individual genes [Perry et al., 2010, Frankel et al., 2010, Lagha et al., 2012, Little et al., 2013, Battich et al., 2015, Dickel et al., 2018, Osterwalder et al., 2018, Paliou et al., 2019] can contribute to the fidelity of gene expression. Some of these mechanisms may play a part in the precision of neural tube gene expression. For example, paralogs of several of the key transcription factors are co-expressed in the neural tube and appear to function, at least partially, redundantly [Vallstedt et al., 2001, Holz et al., 2010]. In addition, the provision of antiparallel signaling gradients emanating from the opposing dorsal and ventral poles of the neural tube have been implicated in increasing the precision of gene expression in central regions of the spinal cord [Zagorski et al., 2017]. However the ventral regions of the neural tube where the p3-pMN boundary is positioned is out of range of the dorsal signal. The changes in boundary precision in the neural

363 tube of the Pax6<sup>-/-</sup> and O2e33<sup>-/-</sup> mutants are not explained by changes in noise amplitude  
364 in individual genes or global changes in the magnitude of the noise. Instead the genetic  
365 perturbations we analysed alter the dynamics of the GRN and these change the configuration  
366 of gene expression fluctuations and make noise driven transitions between cell states more likely.  
367 Thus the dynamics of the gene regulatory network affect patterning precision, without altering  
368 the stochasticity of individual components of the system, indicating that the configuration of  
369 gene expression noise, not simply the magnitude, affects development precision.

370 Stochastic fluctuations in gene expression are expected to result in variations in the position  
371 at which cells switch identity and produce indistinct boundaries. There is a trade-off between  
372 the steepness, precision and speed of boundary formation [Chalancon et al., 2012, Lv et al.,  
373 2014, Perez-Carrasco et al., 2016, Tran et al., 2018]. If gene expression were deterministic,  
374 a graded signal controlling such a switch would generate a sharp, precisely positioned gene  
375 expression boundary in the tissue. However, the effect of stochastic fluctuations is that an  
376 increase in non-linearity and switch-like behaviour decreases boundary precision: stochastic  
377 fluctuations generate a change in gene expression that is independent of changes in signal  
378 input. Our analysis of the Pax6-Olig2-Nkx2.2 network revealed that the GRN is configured  
379 to decrease the probability of such spontaneous noise driven transitions while retaining the  
380 ability to produce discontinuous switch-like changes in gene expression, thereby generating a  
381 sharp, precise boundary in the tissue. This mechanism enhances boundary precision even in  
382 the presence of noise in the signalling gradient (Supp. F & Fig. S18). Moreover, the same  
383 regulatory mechanism that decreases the probability of a noise driven transition from pMN  
384 to p3 also produces hysteresis, this ratchet-like effect means that once a cell has adopted  
385 a p3 identity it is unlikely to transition back [Balaskas et al., 2012]. Thus the dynamics of  
386 this GRN increase the precision of the pMN-p3 boundary by decreasing the probability of  
387 transitions between pMN and p3 in either direction.

### 388 **Configuring the dynamical landscape to maximise precision**

389 . Viewed from the perspective of the Waddington landscape [Waddington, 1957], spontaneous  
390 changes in cell state resulting from gene expression fluctuations would be represented as a cell  
391 being displaced from one valley to another by traversing the intervening ridge (Supplementary  
392 Section B). The dynamical landscape produced by the Pax6-Olig2-Nkx2.2 network is config-  
393 ured so that the height of the ridge between the two valleys changes rapidly as the level of  
394 morphogen signalling changes. This is evident from analysis of the MAP, which reveals that  
395 transition trajectories between cell states diverge substantially from the shortest route to the

396 transition point (Fig. 4B-E). The consequence of this is that the effective energy necessary for  
397 a noise induced fate transition was higher for WT than either of the mutants with a perturbed  
398 GRN (Fig. 4F & Supplemental Section C). Thus the GRN minimizes the range of signalling  
399 for which noise induced transitions are likely to occur, without altering the stochasticity of  
400 individual genes, hence increasing boundary sharpness.

401 This mechanism, which we termed “curvature”, was identified in an unbiased computational  
402 screen of three node networks responding to a graded input signal (Fig. 5). In addition, the  
403 screen recovered a second mechanism - “separation speed” - that relied on the rate at which  
404 the two cell states separated in response to changes in the level of input signal (Fig. 5B).  
405 In the context of the Waddington landscape, separation speed can be viewed as changes in  
406 signal levels producing rapid changes in the distance between the two valleys. A feature of  
407 this second mechanism is that it can be implemented with only two genes. However, instead  
408 of producing two cell states both with uniform levels of gene expression, one of the resulting  
409 cell states is characterised by a gradient of gene expression (S15). This might limit its utility  
410 in some tissue patterning roles. By contrast, the curvature mechanism requires a minimum  
411 of three nodes to implement, but it is able to produce two cell states with almost constant  
412 levels of gene expression. Nevertheless, the two mechanisms of speed and curvature are not  
413 mutually exclusive and the networks recovered by the screen that generated the most precise  
414 boundaries combined both mechanisms.

### 415 **Regulatory principles of patterning precision**

416 Similar to other recent studies [Cotterell and Sharpe, 2010, Schaerli et al., 2014, Verd et al.,  
417 2019], the screen indicated that the dynamics of the networks, not simply the network topology,  
418 were key to determining the resulting precision. A feature shared by many of the networks with  
419 the sharpest boundaries, including the neural tube network, was an asymmetry in inhibition  
420 between two of the genes (Fig 5H). Specifically,  $x_3$  (Pax6) repressed  $x_2$  (Olig2), but not  
421 vice versa. Moreover, the graded expression of Pax6 ( $x_3$ ) within the domain is indicative of  
422 the separation speed mechanism, providing evidence that this too contributes to boundary  
423 precision while allowing uniform levels of Olig2 expression ( $x_2$ ; the gene necessary for defining  
424 the identity of this domain). This analysis therefore raises the possibility that the dynamics  
425 of the Pax6-Olig2-Nkx2.2 network were adopted in the developing vertebrate neural tube for  
426 its capacity to generate distinct cell type identities with precise boundaries. In this context,  
427 it is striking that gene circuits with similar structure and dynamics have been implicated in  
428 the patterning of the anterior-posterior axis of the *Drosophila* embryo [Akam, 1987, Ingham,

429 1988, Sánchez and Thieffry, 2001, Manu et al., 2009, Verd et al., 2017] and the *Drosophila* eye  
430 imaginal discs [O'Neill et al., 1994, Rebay and Rubin, 1995, Graham et al., 2010] (Supplemental  
431 Section F & Fig. S19, S20). Taken together therefore, the computational screen defines design  
432 features of multi-stable gene circuits that are suited to the generation of sharp boundaries in  
433 response to graded inputs.

434 The dynamics of a GRN are governed by the strength of regulatory interactions between  
435 the components of the network, which in turn are determined by cis regulatory elements and  
436 their binding to transcription factors [Davidson, 2010]. Many genes involved in development  
437 are associated with two or more cis regulatory elements that seem to function in a partially  
438 redundant manner [Perry et al., 2011, El-Sherif and Levine, 2016, Cannavò et al., 2016,  
439 Dunipace et al., 2019]. This appears to be the case for *Olig2*, where removal of the O2e33  
440 element perturbs, but does not completely abrogate, *Olig2* expression (Fig. 2). This supports  
441 the idea that one function of multiple cis regulatory elements is to provide robustness and  
442 precision to gene expression [Perry et al., 2010, Frankel et al., 2010, Lagha et al., 2012, Battich  
443 et al., 2015, Dickel et al., 2018, Osterwalder et al., 2018, Paliou et al., 2019, Tsai et al.,  
444 2019]. Our analysis indicates that these functions are not simply a consequence of multiple  
445 elements supplying duplicate activities. Instead individual cis regulatory elements provide  
446 specific dynamical properties to gene regulation that sculpt the gene expression landscape.  
447 Thus, distinct cis regulatory elements of a target gene serve specific dynamical functions  
448 within a GRN.

449 Taken together, our analysis illustrates how a tissue level feature - the spatial precision  
450 of gene expression patterns - is influenced by cell autonomous mechanisms, implemented by  
451 cis regulatory elements that influence the activity of a network of interacting transcription  
452 factors. The data reveal that the potential detrimental effects of stochastic fluctuations in  
453 gene expression that would lead to spatial heterogeneity can be attenuated by the dynamics of  
454 the GRN. We term the strategy "precision by design" as it arises from the integrated function  
455 of the gene circuit and is not intrinsic to any individual network component. This provides  
456 insight into decision making in multicellular systems and highlights how an understanding of  
457 the dynamics of GRNs can explain its structure and function. More generally, identifying the  
458 principles that produce robust and precise outputs despite the inherent stochasticity of gene  
459 expression should assist in the future design, modification and engineering of gene circuits.

## 460 **Acknowledgements**

461 We thank JP Vincent, B Verd and members of the lab for constructive discussions and com-  
462 ments. We are grateful to the Flow Cytometry, Biological Resource and HPC Facilities of  
463 the Francis Crick Institute. This work was supported by: the Francis Crick Institute, which  
464 receives its core funding from Cancer Research UK (FC001051), the UK Medical Research  
465 Council (FC001051), and Wellcome (FC001051); funding from Wellcome [WT098325MA and  
466 WT098326MA]; the European Research Council under European Union (EU) Horizon 2020  
467 research and innovation program grant 742138. RPC acknowledges the UCL Mathematics  
468 Clifford Fellowship.

## 469 **Competing Interests**

470 The authors declare no competing or financial interests.

## 471 **Author Contributions**

472 KE, EHD, PS & JB conceived the project, interpreted the data and wrote the manuscript with  
473 input from all authors. KE performed all experiments except those listed under other authors.  
474 EHD performed theoretical modelling and data analysis. LGP performed the protein copy  
475 number quantifications. RPC contributed to building the mathematical models and provided  
476 advice. AS generated the Olig2-T2A-mKate2 ES cell derived neural progenitors. VM analysed  
477 the ATAC-seq data and supervised experimental work. PS & JB supervised the project.

## 478 **References**

- 479 [Addison et al., 2018] Addison, M., Xu, Q., Cayuso, J., and Wilkinson, D. G. (2018). Cell  
480 Identity Switching Regulated by Retinoic Acid Signaling Maintains Homogeneous Segments  
481 in the Hindbrain. *Developmental Cell*, 45(5):606–620.e3.
- 482 [Akam, 1987] Akam, M. (1987). The molecular basis for metameric pattern in the *Drosophila*  
483 embryo. *Development*, 101(1):1–22.
- 484 [Balaskas et al., 2019] Balaskas, N., Abbott, L. F., Jessell, T. M., and Ng, D. (2019). Po-  
485 sitional Strategies for Connection Specificity and Synaptic Organization in Spinal Sensory-  
486 Motor Circuits. *Neuron*, 102(6):1143–1156.e4.

- 487 [Balaskas et al., 2012] Balaskas, N., Ribeiro, A., Panovska, J., Dessaud, E., Sasai, N., Page,  
488 K. M., Briscoe, J., and Ribes, V. (2012). Gene regulatory logic for reading the sonic  
489 hedgehog signaling gradient in the vertebrate neural tube. *Cell*, 148(1-2):273–284.
- 490 [Balázsi et al., 2011] Balázsi, G., Van Oudenaarden, A., and Collins, J. J. (2011). Cellular  
491 decision making and biological noise: From microbes to mammals.
- 492 [Battich et al., 2015] Battich, N., Stoeger, T., and Pelkmans, L. (2015). Control of Transcript  
493 Variability in Single Mammalian Cells. *Cell*, 163(7):1596–1610.
- 494 [Bollenbach et al., 2008] Bollenbach, T., Pantazis, P., Kicheva, A., Bökel, C., González-  
495 Gaitán, M., and Jülicher, F. (2008). Precision of the Dpp gradient. *Development (Cam-*  
496 *bridge, England)*, 135(6):1137–46.
- 497 [Briscoe et al., 2000] Briscoe, J., Pierani, A., Jessell, T. M., and Ericson, J. (2000). A home-  
498 odomain protein code specifies progenitor cell identity and neuronal fate in the ventral neural  
499 tube. *Cell*, 101(4):435–445.
- 500 [Briscoe et al., 1999] Briscoe, J., Sussel, L., Serup, P., Hartigan-O'Connor, D., Jessell, T. M.,  
501 Rubenstein, J. L. R., and Ericson, J. (1999). Homeobox gene Nkx2.2 and specification of  
502 neuronal identity by graded Sonic hedgehog signalling. *Nature*, 398(6728):622–627.
- 503 [Bunin et al., 2012] Bunin, G., Kafri, Y., and Podolsky, D. (2012). Large deviations in  
504 boundary-driven systems: Numerical evaluation and effective large-scale behavior. *EPL*,  
505 99(2).
- 506 [Cannavò et al., 2016] Cannavò, E., Khoueiry, P., Garfield, D. A., Geeleher, P., Zichner, T.,  
507 Gustafson, E. H., Ciglar, L., Korb, J. O., and Furlong, E. E. (2016). Shadow Enhancers Are  
508 Pervasive Features of Developmental Regulatory Networks. *Current Biology*, 26(1):38–51.
- 509 [Chalancon et al., 2012] Chalancon, G., Ravarani, C. N., Balaji, S., Martinez-Arias, A., Ar-  
510 avind, L., Jothi, R., and Babu, M. M. (2012). Interplay between gene expression noise and  
511 regulatory network architecture. *Trends in Genetics*, 28(5):221–232.
- 512 [Cohen et al., 2015] Cohen, M., Kicheva, A., Ribeiro, A., Blassberg, R., Page, K. M., Barnes,  
513 C. P., and Briscoe, J. (2015). Ptch1 and Gli regulate Shh signalling dynamics via multiple  
514 mechanisms. *Nature Communications*, 6:6709.



- 515 [Cohen et al., 2014] Cohen, M., Page, K. M., Perez-Carrasco, R., Barnes, C. P., and Briscoe,  
516 J. (2014). A theoretical framework for the regulation of Shh morphogen-controlled gene  
517 expression. *Development*, 141(20):3868–3878.
- 518 [Cotterell and Sharpe, 2010] Cotterell, J. and Sharpe, J. (2010). An atlas of gene regula-  
519 tory networks reveals multiple three-gene mechanisms for interpreting morphogen gradients.  
520 *Molecular Systems Biology*, 6(425):425.
- 521 [Dahmann et al., 2011] Dahmann, C., Oates, A. C., and Brand, M. (2011). Boundary forma-  
522 tion and maintenance in tissue development. *Nature Reviews Genetics*, 12(1):43–55.
- 523 [Davidson, 2010] Davidson, E. H. (2010). Emerging properties of animal gene regulatory  
524 networks. *Nature*, 468(7326):911–920.
- 525 [de la Cruz et al., 2018] de la Cruz, R., Perez-Carrasco, R., Guerrero, P., Alarcon, T., and  
526 Page, K. M. (2018). Minimum Action Path Theory Reveals the Details of Stochastic  
527 Transitions Out of Oscillatory States. *Physical Review Letters*, 120(12):128102.
- 528 [Dickel et al., 2018] Dickel, D. E., Ypsilanti, A. R., Pla, R., Zhu, Y., Barozzi, I., Mannion,  
529 B. J., Khin, Y. S., Fukuda-Yuzawa, Y., Plajzer-Frick, I., Pickle, C. S., Lee, E. A., Harrington,  
530 A. N., Pham, Q. T., Garvin, T. H., Kato, M., Osterwalder, M., Akiyama, J. A., Afzal, V.,  
531 Rubenstein, J. L. R., Pennacchio, L. A., and Visel, A. (2018). Ultraconserved Enhancers  
532 Are Required for Normal Development. *Cell*, 172(3):491—499.e15.
- 533 [Doetschman et al., 1987] Doetschman, T., Gregg, R. G., Maeda, N., Hooper, M. L., Melton,  
534 D. W., Thompson, S., and Smithies, O. (1987). Targetted correction of a mutant HPRT  
535 gene in mouse embryonic stem cells. *Nature*, 330(6148):576–578.
- 536 [Dubuis et al., 2013] Dubuis, J. O., Tkacik, G., Wieschaus, E. F., Gregor, T., and Bialek, W.  
537 (2013). Positional information, in bits. *Proceedings of the National Academy of Sciences  
538 of the United States of America*, 110(41):16301–16308.
- 539 [Dunipace et al., 2019] Dunipace, L., Ákos, Z., and Stathopoulos, A. (2019). Coacting en-  
540 hancers can have complementary functions within gene regulatory networks and promote  
541 canalization. *PLOS Genetics*, 15(12):e1008525.
- 542 [El-Sherif and Levine, 2016] El-Sherif, E. and Levine, M. (2016). Shadow Enhancers Medi-  
543 ate Dynamic Shifts of Gap Gene Expression in the Drosophila Embryo. *Current Biology*,  
544 26(9):1164–1169.

- 545 [Enver et al., 2009] Enver, T., Pera, M., Peterson, C., and Andrews, P. W. (2009). Stem Cell  
546 States, Fates, and the Rules of Attraction. *Cell Stem Cell*, 4(5):387–397.
- 547 [Ericson et al., 1997] Ericson, J., Rashbass, P., Schedl, A., Brenner-Morton, S., Kawakami,  
548 A., Van Heyningen, V., Jessell, T. M., and Briscoe, J. (1997). Pax6 controls progenitor cell  
549 identity and neuronal fate in response to graded Shh signaling. *Cell*, 90(1):169–180.
- 550 [Frankel et al., 2010] Frankel, N., Davis, G. K., Vargas, D., Wang, S., Payre, F., and Stern,  
551 D. L. (2010). Phenotypic robustness conferred by apparently redundant transcriptional  
552 enhancers. *Nature*, 466(7305):490–493.
- 553 [Gillespie, 2000] Gillespie, D. T. (2000). Chemical Langevin equation. *Journal of Chemical*  
554 *Physics*, 113(1):297–306.
- 555 [Gouti et al., 2014] Gouti, M., Tsakiridis, A., Wymeersch, F. J., Huang, Y., Kleinjung, J., Wil-  
556 son, V., and Briscoe, J. (2014). In vitro generation of neuromesodermal progenitors reveals  
557 distinct roles for wnt signalling in the specification of spinal cord and paraxial mesoderm  
558 identity. *PLoS Biology*, 12(8):e1001937.
- 559 [Graham et al., 2010] Graham, T. G., Tabei, S. M., Dinner, A. R., and Rebay, I. (2010).  
560 Modeling bistable cell-fate choices in the *Drosophila* eye: Qualitative and quantitative per-  
561 spectives. *Development*, 137(14):2265–2278.
- 562 [Graham et al., 2003] Graham, V., Khudyakov, J., Ellis, P., and Pevny, L. (2003). SOX2  
563 Functions to Maintain Neural Progenitor Identity. *Neuron*, 39(5):749–765.
- 564 [Herrera-Delgado et al., 2018] Herrera-Delgado, E., Perez-Carrasco, R., Briscoe, J., and Sol-  
565 lich, P. (2018). Memory functions reveal structural properties of gene regulatory networks.  
566 *PLoS Computational Biology*, 14(2):1–25.
- 567 [Holz et al., 2010] Holz, A., Kollmus, H., Ryge, J., Niederkofler, V., Dias, J., Ericson, J.,  
568 Stoeckli, E. T., Kiehn, O., and Arnold, H. H. (2010). The transcription factors Nkx2.2  
569 and Nkx2.9 play a novel role in floor plate development and commissural axon guidance.  
570 *Development*, 137(24):4249–4260.
- 571 [Ingham, 1988] Ingham, P. W. (1988). The molecular genetics of embryonic pattern formation  
572 in *Drosophila*. *Nature*, 335(6185):25–34.
- 573 [Jessell et al., 2011] Jessell, T. M., Sürmeli, G., and Kelly, J. S. (2011). Motor neurons and  
574 the sense of place. *Neuron*, 72(3):419–424.

- 575 [Kicheva et al., 2014] Kicheva, A., Bollenbach, T., Ribeiro, A., Pérez Valle, H., Lovell-Badge,  
576 R., Episkopou, V., and Briscoe, J. (2014). Coordination of progenitor specification and  
577 growth in mouse and chick spinal cord. *Science*, 345(6204):1254927–1254927.
- 578 [Kleinert, 2009] Kleinert, H. (2009). *Path Integrals In Quantum Mechanics, Statistics, Poly-*  
579 *mer Physics, And Financial Markets (5th Edition)*. World Scientific Publishing Company,  
580 5th edition.
- 581 [Kutejova et al., 2016] Kutejova, E., Sasai, N., Shah, A., Gouti, M., and Briscoe, J. (2016).  
582 Neural Progenitors Adopt Specific Identities by Directly Repressing All Alternative Progen-  
583 itor Transcriptional Programs. *Developmental Cell*, 36(6):639–653.
- 584 [Kuznetsov, 2008] Kuznetsov, Y. (2008). *Elements of Applied Bifurcation Theory*. Applied  
585 Mathematical Sciences. Springer New York.
- 586 [Lagha et al., 2012] Lagha, M., Bothma, J. P., and Levine, M. (2012). Mechanisms of tran-  
587 scriptional precision in animal development. *Trends in Genetics*, 28(8):409–416.
- 588 [Leber and Sanes, 1995] Leber, S. M. and Sanes, J. R. (1995). Migratory paths of neurons  
589 and glia in the embryonic chick spinal cord. *Journal of Neuroscience*, 15(2):1236–1248.
- 590 [Lei et al., 2004] Lei, Q., Zelman, A. K., Kuang, E., Li, S., and Matise, M. P. (2004). Trans-  
591 duction of graded Hedgehog signaling by a combination of Gli2 and Gli3 activator functions  
592 in the developing spinal cord. *Development*, 131(15):3593–3604.
- 593 [Lemons and Gythiel, 1997] Lemons, D. S. and Gythiel, A. (1997). Paul Langevin's 1908  
594 paper "On the Theory of Brownian Motion" ["Sur la théorie du mouvement brownien," C.  
595 R. Acad. Sci. (Paris) 146 , 530-533 (1908)]. *American Journal of Physics*, 65(11):1079–  
596 1081.
- 597 [Leon et al., 2016] Leon, M., Woods, M. L., Fedorec, A. J., and Barnes, C. P. (2016). A  
598 computational method for the investigation of multistable systems and its application to  
599 genetic switches. *BMC Systems Biology*, 10(1):1–12.
- 600 [Li and Wang, 2013] Li, C. and Wang, J. (2013). Quantifying Cell Fate Decisions for Differ-  
601 entiation and Reprogramming of a Human Stem Cell Network: Landscape and Biological  
602 Paths. *PLoS Computational Biology*, 9(8):e1003165.
- 603 [Little et al., 2013] Little, S. C., Tikhonov, M., and Gregor, T. (2013). Precise developmental  
604 gene expression arises from globally stochastic transcriptional activity. *Cell*, 154(4):789–800.

- 605 [Lo et al., 2015] Lo, W. C., Zhou, S., Wan, F. Y., Lander, A. D., and Nie, Q. (2015). Ro-  
606 bust and precise morphogen-mediated patterning: Trade-offs, constraints and mechanisms.  
607 *Journal of the Royal Society Interface*, 12(102):20141041–20141041.
- 608 [Lucas et al., 2018] Lucas, T., Tran, H., Perez Romero, C. A., Guillou, A., Fradin, C., Coppey,  
609 M., Walczak, A. M., and Dostatni, N. (2018). 3 Minutes To Precisely Measure Morphogen  
610 Concentration. *PLoS Genetics*, 14(10):e1007676.
- 611 [Lv et al., 2014] Lv, C., Li, X., Li, F., and Li, T. (2014). Constructing the Energy Landscape  
612 for Genetic Switching System Driven by Intrinsic Noise. *PLoS ONE*, 9(2):e88167.
- 613 [Lyapunov, 1992] Lyapunov, A. M. (1992). The general problem of the stability of motion.  
614 *International Journal of Control*, 55(3):531–534.
- 615 [Manu et al., 2009] Manu, Surkova, S., Spirov, A. V., Gursky, V. V., Janssens, H., Kim, A. R.,  
616 Radulescu, O., Vanario-Alonso, C. E., Sharp, D. H., Samsonova, M., and Reinitz, J. (2009).  
617 Canalization of gene expression in the Drosophila blastoderm by gap gene cross regulation.  
618 *PLoS Biology*, 7(3):0591–0603.
- 619 [McAdams and Arkin, 1997] McAdams, H. H. and Arkin, A. (1997). Stochastic mechanisms  
620 in gene expression. *Proceedings of the National Academy of Sciences*, 94(3):814–819.
- 621 [Metzis et al., 2018] Metzis, V., Steinhauser, S., Pakanavicius, E., Gouti, M., Stamataki,  
622 D., Ivanovitch, K., Watson, T., Rayon, T., Mousavy Gharavy, S. N., Lovell-Badge, R.,  
623 Luscombe, N. M., and Briscoe, J. (2018). Nervous System Regionalization Entails Axial  
624 Allocation before Neural Differentiation. *Cell*, 175(4):1105—1118.e17.
- 625 [Nishi et al., 2015] Nishi, Y., Zhang, X., Jeong, J., Peterson, K. A., Vedenko, A., Bulyk,  
626 M. L., Hide, W. A., and McMahon, A. P. (2015). A direct fate exclusion mechanism by  
627 Sonic hedgehog-regulated transcriptional repressors. *Development*, 142(19):3286–3293.
- 628 [Novitsch et al., 2001] Novitsch, B. G., Chen, A. I., and Jessell, T. M. (2001). Coordinate  
629 regulation of motor neuron subtype identity and pan-neuronal properties by the bHLH  
630 repressor Olig2. *Neuron*, 31(5):773–789.
- 631 [O’Neill et al., 1994] O’Neill, E. M., Rebay, I., Tjian, R., and Rubin, G. M. (1994). The  
632 activities of two Ets-related transcription factors required for drosophila eye development  
633 are modulated by the Ras/MAPK pathway. *Cell*, 78(1):137–147.

- 634 [Oosterveen et al., 2012] Oosterveen, T., Kurdija, S., Alekseenko, Z., Uhde, C. W., Bergsland,  
635 M., Sandberg, M., Andersson, E., Dias, J. M., Muhr, J., and Ericson, J. (2012). Mechanistic  
636 Differences in the Transcriptional Interpretation of Local and Long-Range Shh Morphogen  
637 Signaling. *Developmental Cell*, 23(5):1006–1019.
- 638 [Osterwalder et al., 2018] Osterwalder, M., Barozzi, I., Tissières, V., Fukuda-Yuzawa, Y.,  
639 Mannion, B. J., Afzal, S. Y., Lee, E. A., Zhu, Y., Plajzer-Frick, I., Pickle, C. S., Kato,  
640 M., Garvin, T. H., Pham, Q. T., Harrington, A. N., Akiyama, J. A., Afzal, V., Lopez-Rios,  
641 J., Dickel, D. E., Visel, A., and Pennacchio, L. A. (2018). Enhancer redundancy provides  
642 phenotypic robustness in mammalian development. *Nature*, 554(7691):239–243.
- 643 [Paliou et al., 2019] Paliou, C., Guckelberger, P., Schöpflin, R., Heinrich, V., Esposito, A.,  
644 Chiariello, A. M., Bianco, S., Annunziatella, C., Helmuth, J., Haas, S., Jerkovic, I., Brieske,  
645 N., Wittler, L., Timmermann, B., Nicodemi, M., Vingron, M., Mundlos, S., and Andrey,  
646 G. (2019). Prefomed chromatin topology assists transcriptional robustness of Shh during  
647 limb development. *Proceedings of the National Academy of Sciences of the United States  
648 of America*, 116(25):12390–12399.
- 649 [Panovska-Griffiths et al., 2013] Panovska-Griffiths, J., Page, K. M., and Briscoe, J. (2013).  
650 A gene regulatory motif that generates oscillatory or multiway switch outputs. *Journal of  
651 the Royal Society Interface*, 10(79):20120826.
- 652 [Perez-Carrasco et al., 2016] Perez-Carrasco, R., Guerrero, P., Briscoe, J., and Page, K. M.  
653 (2016). Intrinsic Noise Profoundly Alters the Dynamics and Steady State of Morphogen-  
654 Controlled Bistable Genetic Switches. *PLoS Computational Biology*, 12(10):e1005154.
- 655 [Perry et al., 2010] Perry, M. W., Boettiger, A. N., Bothma, J. P., and Levine, M. (2010).  
656 Shadow Enhancers Foster Robustness of Drosophila Gastrulation. *Current Biology*,  
657 20(17):1562–1567.
- 658 [Perry et al., 2011] Perry, M. W., Boettiger, A. N., and Levine, M. (2011). Multiple enhancers  
659 ensure precision of gap gene-expression patterns in the Drosophila embryo. *Proceedings of  
660 the National Academy of Sciences of the United States of America*, 108(33):13570–13575.
- 661 [Peterson et al., 2012] Peterson, K. A., Nishi, Y., Ma, W., Vedenko, A., Shokri, L., Zhang,  
662 X., McFarlane, M., Baizabal, J. M., Junker, J. P., van Oudenaarden, A., Mikkelsen, T.,  
663 Bernstein, B. E., Bailey, T. L., Bulyk, M. L., Wong, W. H., and McMahon, A. P. (2012).

- 664 Neural-specific Sox2 input and differential Gli-binding affinity provide context and positional  
665 information in Shh-directed neural patterning. *Genes and Development*, 26(24):2802–2816.
- 666 [Petkova et al., 2019] Petkova, M. D., Tkačik, G., Bialek, W., Wieschaus, E. F., and Gregor,  
667 T. (2019). Optimal Decoding of Cellular Identities in a Genetic Network. *Cell*, 176(4):844–  
668 855.e15.
- 669 [Raj and van Oudenaarden, 2008] Raj, A. and van Oudenaarden, A. (2008). Nature, Nurture,  
670 or Chance: Stochastic Gene Expression and Its Consequences. *Cell*, 135(2):216–226.
- 671 [Ran et al., 2013] Ran, F. A., Hsu, P. D., Wright, J., Agarwala, V., Scott, D. A., and Zhang, F.  
672 (2013). Genome engineering using the CRISPR-Cas9 system. *Nature protocols*, 8(11):2281–  
673 2308.
- 674 [Raser and O'Shea, 2005] Raser, J. M. and O'Shea, E. K. (2005). Noise in gene expression:  
675 origins, consequences, and control. *Science (New York, N.Y.)*, 309(5743):2010–3.
- 676 [Rasmussen and Williams, 2004] Rasmussen, C. E. and Williams, C. K. I. (2004). Gaussian  
677 processes for machine learning. *International journal of neural systems*, 14(2):69–106.
- 678 [Rayon et al., 2019] Rayon, T., Stamatakis, D., Perez-Carrasco, R., Garcia-Perez, L., Bar-  
679 rington, C., Melchionda, M., Exelby, K., Tybulewicz, V., Fisher, E. M. C., and Briscoe,  
680 J. (2019). Species-specific developmental timing is associated with global differences in  
681 protein stability in mouse and human. *bioRxiv*, page 2019.12.29.889543.
- 682 [Rebay and Rubin, 1995] Rebay, I. and Rubin, G. M. (1995). Yan functions as a general  
683 inhibitor of differentiation and is negatively regulated by activation of the Ras1/MAPK  
684 pathway. *Cell*, 81(6):857–866.
- 685 [Rudolf et al., 2015] Rudolf, K., Umetsu, D., Aliee, M., Sui, L., Jülicher, F., and Dahmann, C.  
686 (2015). A local difference in Hedgehog signal transduction increases mechanical cell bond  
687 tension and biases cell intercalations along the *Drosophila* anteroposterior compartment  
688 boundary. *Development*, 142(22):3845–3858.
- 689 [Sagner and Briscoe, 2019] Sagner, A. and Briscoe, J. (2019). Establishing neuronal diversity  
690 in the spinal cord: a time and a place. *Development*, 146(22):dev182154.
- 691 [Sagner et al., 2018] Sagner, A., Gaber, Z. B., Delile, J., Kong, J. H., Rousso, D. L., Pearson,  
692 C. A., Weicksel, S. E., Melchionda, M., Mousavy Gharavy, S. N., Briscoe, J., and Novitch,

- 693 B. G. (2018). Olig2 and Hes regulatory dynamics during motor neuron differentiation  
694 revealed by single cell transcriptomics. *PLOS Biology*, 16(2):e2003127.
- 695 [Sánchez and Thieffry, 2001] Sánchez, L. and Thieffry, D. (2001). A Logical Analysis of the  
696 *Drosophila* Gap-gene System. *Journal of Theoretical Biology*, 211(2):115–141.
- 697 [Schaerli et al., 2014] Schaerli, Y., Munteanu, A., Gili, M., Cotterell, J., Sharpe, J., and  
698 Isalan, M. (2014). A unified design space of synthetic stripe-forming networks. *Nature*  
699 *Communications*, 5(May).
- 700 [Schwanhäusser et al., 2011] Schwanhäusser, B., Busse, D., Li, N., Dittmar, G., Schuchhardt,  
701 J., Wolf, J., Chen, W., and Selbach, M. (2011). Global quantification of mammalian gene  
702 expression control. *Nature*, 473(7347):337–342.
- 703 [Sherman and Cohen, 2012] Sherman, M. S. and Cohen, B. A. (2012). Thermodynamic state  
704 ensemble models of cis-regulation. *PLoS Computational Biology*, 8(3):e1002407.
- 705 [Sokolowski et al., 2012] Sokolowski, T. R., Erdmann, T., and ten Wolde, P. R. (2012). Mu-  
706 tual Repression Enhances the Steepness and Precision of Gene Expression Boundaries. *PLoS*  
707 *Computational Biology*, 8(8).
- 708 [Standley et al., 2001] Standley, H. J., Zorn, A. M., and Gurdon, J. B. (2001). eFGF and  
709 its mode of action in the community effect during *Xenopus* myogenesis. *Development*  
710 (*Cambridge, England*), 128(8):1347–57.
- 711 [Strogatz, 2014] Strogatz, S. (2014). *Nonlinear Dynamics and Chaos (Studies in Nonlinearity)*.  
712 Advanced book program. Westview Press, 2nd edition.
- 713 [Thomas et al., 2012] Thomas, P., Grima, R., and Straube, A. V. (2012). Rigorous elimination  
714 of fast stochastic variables from the linear noise approximation using projection operators.  
715 *Physical Review E - Statistical, Nonlinear, and Soft Matter Physics*, 86(4):041110.
- 716 [Tkačik et al., 2015] Tkačik, G., Dubuis, J. O., Petkova, M. D., and Gregor, T. (2015). Posi-  
717 tional information, Positional error, and readout precision in morphogenesis: A mathematical  
718 framework. *Genetics*, 199(1):39–59.
- 719 [Tran et al., 2018] Tran, H., Desponds, J., Romero, C. A. P., Coppey, M., Fradin, C.,  
720 Dostatni, N., Walczak, A. M., Perez Romero, C. A., Coppey, M., Fradin, C., Dostatni,

- 721 N., and Walczak, A. M. (2018). Precision in a rush: Trade-offs between reproducibil-  
722 ity and steepness of the hunchback expression pattern. *PLoS computational biology*,  
723 14(10):e1006513.
- 724 [Tsai et al., 2019] Tsai, A., Alves, M. R., and Crocker, J. (2019). Multi-enhancer transcrip-  
725 tional hubs confer phenotypic robustness. *eLife*, 8:1–17.
- 726 [Tsai et al., 2020] Tsai, T. Y.-C., Sikora, M., Xia, P., Colak-Champollion, T., Knaut, H.,  
727 Heisenberg, C.-P., and Megason, S. G. (2020). An adhesion code ensures robust pattern  
728 formation during tissue morphogenesis. *Science (New York, N.Y.)*, 370(6512):113–116.
- 729 [Vallstedt et al., 2001] Vallstedt, A., Muhr, J., Pattyn, A., Pierani, A., Mendelsohn, M.,  
730 Sander, M., Jessell, T. M., and Ericson, J. (2001). Different levels of repressor activity  
731 assign redundant and specific roles to Nkx6 genes in motor neuron and interneuron specifi-  
732 cation. *Neuron*, 31(5):743–755.
- 733 [Van Kampen, 2007] Van Kampen, N. G. (2007). *Stochastic Processes in Physics and Chem-*  
734 *istry*. North-Holland Personal Library. Elsevier, 3rd ed edition.
- 735 [Verd et al., 2017] Verd, B., Crombach, A., and Jaeger, J. (2017). Dynamic Maternal Gradi-  
736 ents Control Timing and Shift-Rates for Drosophila Gap Gene Expression. *PLoS Computa-*  
737 *tional Biology*, 13(2):e1005285.
- 738 [Verd et al., 2019] Verd, B., Monk, N. A., and Jaeger, J. (2019). Modularity, criticality, and  
739 evolvability of a developmental gene regulatory network. *eLife*, 8.
- 740 [Waddington, 1957] Waddington, C. H. (1957). *The strategy of the genes. A discussion of*  
741 *some aspects of theoretical biology*. Allen & Unwin.
- 742 [Wang et al., 2007] Wang, J., Zhang, J., Yuan, Z., and Zhou, T. (2007). Noise-induced  
743 switches in network systems of the genetic toggle switch. *BMC Systems Biology*, 1:1–14.
- 744 [Wang et al., 2011] Wang, J., Zhang, K., Xu, L., and Wang, E. (2011). Quantifying the  
745 Waddington landscape and biological paths for development and differentiation. *Proceedings*  
746 *of the National Academy of Sciences of the United States of America*, 108(20):8257–62.
- 747 [Xiong et al., 2013] Xiong, F., Tentner, A. R., Huang, P., Gelas, A., Mosaliganti, K. R.,  
748 Souhait, L., Rannou, N., Swinburne, I. A., Obholzer, N. D., Cowgill, P. D., Schier, A. F.,  
749 and Megason, S. G. (2013). Specified neural progenitors sort to form sharp domains after  
750 noisy Shh signaling. *Cell*, 153(3):550–61.



- 751 [Xu et al., 1999] Xu, Q., Mellitzer, G., Robinson, V., and Wilkinson, D. G. (1999). In vivo  
752 cell sorting in complementary segmental domains mediated by Eph receptors and ephrins.  
753 *Nature*, 399(6733):267–271.
- 754 [Zagorski et al., 2017] Zagorski, M., Tabata, Y., Brandenberg, N., Lutolf, M. P., Tkačik, G.,  
755 Bollenbach, T., Briscoe, J., and Kicheva, A. (2017). Decoding of position in the developing  
756 neural tube from antiparallel morphogen gradients. *Science*, 356(6345):1379–1383.
- 757 [Zhang et al., 2012] Zhang, L., Radtke, K., Zheng, L., Cai, A. Q., Schilling, T. F., and Nie,  
758 Q. (2012). Noise drives sharpening of gene expression boundaries in the zebrafish hindbrain.  
759 *Molecular Systems Biology*, 8(613):613.
- 760 [Zhou et al., 2012] Zhou, J. X., Aliyu, M. D. S., Aurell, E., and Huang, S. (2012). Quasi-  
761 potential landscape in complex multi-stable systems. *Journal of The Royal Society Interface*,  
762 9(77):3539–3553.

**Figure 1**

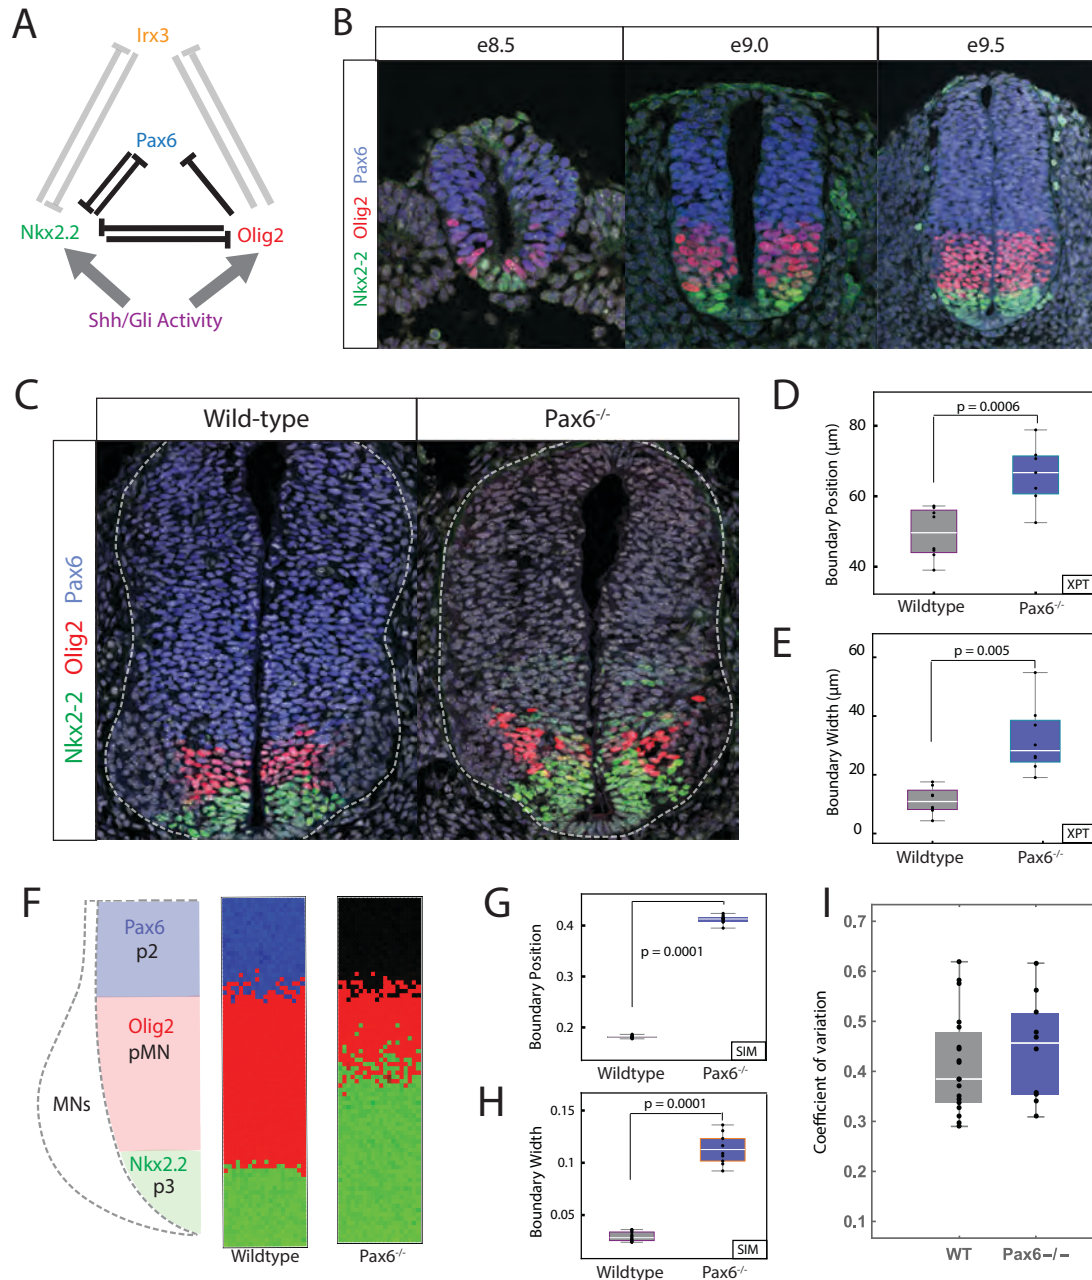

Figure 1: **Pax6 contributes to boundary precision.** (A) Schematic of the GRN responsible for positioning the p3 and pMN domains. (B) Immunofluorescence assays of Pax6 (blue), Olig2 (red) and Nkx2.2 (green) in neural progenitors from e8.5 to e9.5. (C) WT and Pax6<sup>-/-</sup> embryos assayed for Olig2, Pax6 and Nkx2.2. (D) Position of the pMN-p3 boundary in WT (grey) and Pax6<sup>-/-</sup> (blue). (Box plots in all figures show upper and lower quartile and mean;  $n = 7$  (WT),  $n = 8$  (Pax6<sup>-/-</sup>), Mann-Whitney test  $p = 0.005$ ). (E) Width of pMN-p3 boundary in WT (grey) and Pax6<sup>-/-</sup> (blue) (Mann-Whitney test  $p = 0.0006$ ). (F) Stochastic simulations of the GRN in WT (middle) and Pax6<sup>-/-</sup> (right). (G,H) Boundary position and width from simulations. Width is given as fraction of total neural tube size.  $n = 10$  (WT),  $n = 10$  (Pax6<sup>-/-</sup>), Mann-Whitney test  $p = 0.0001$  for position and boundary width. (I) Coefficient of variation (CV) of Olig2 levels for WT and Pax6<sup>-/-</sup> (Mann-Whitney  $p = 0.422$ )

**Figure 2**

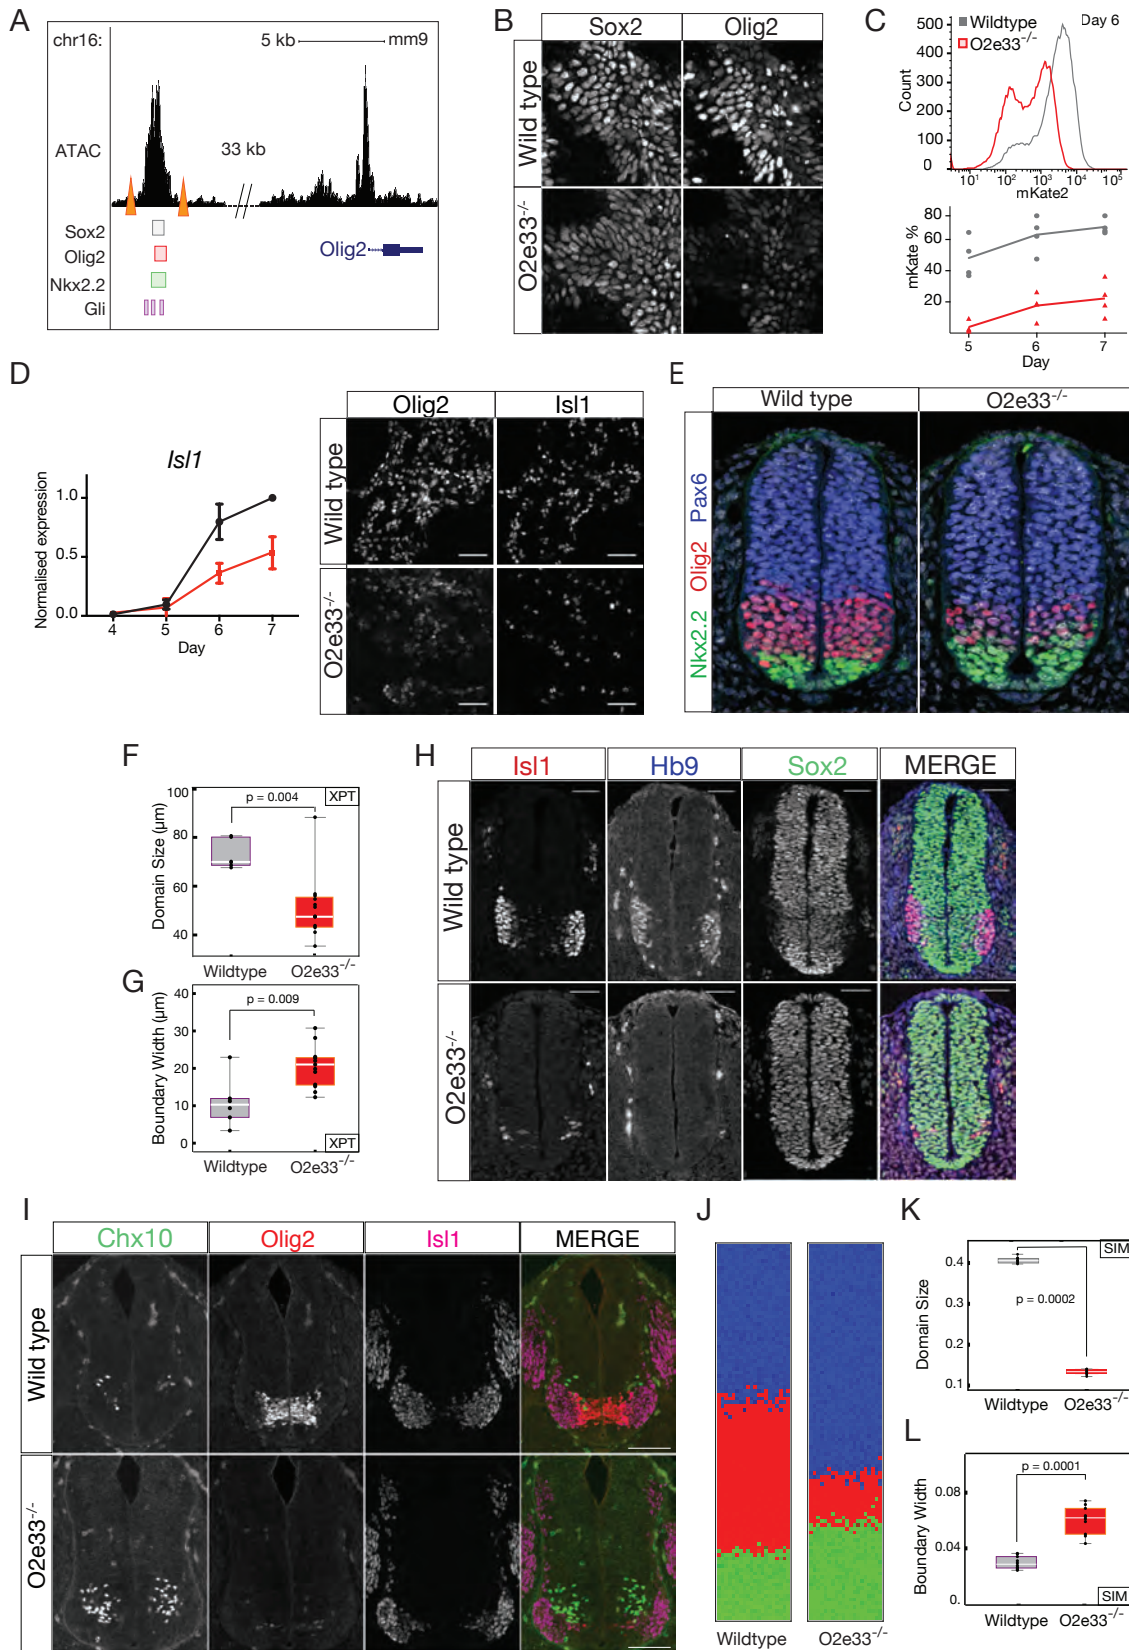

**Figure 2: An Olig2 enhancer affects precision of the pMN-p3 boundary.** (A) Chromatin accessibility (ATAC-seq) and predicted TF binding locations around Olig2. CRISPR target sites (orange triangles) for deletion of the O2e33<sup>-/-</sup> [Metzis et al., 2018, Kutejova et al., 2016, Peterson et al., 2012, Oosterveen et al., 2012]. (B) Sox2 (expressed in all neural progenitors) and Olig2 at day 6 in neural progenitors differentiated from WT and O2e33<sup>-/-</sup> ES cells exposed to 500nM SAG. (C) Flow cytometry (top) for mKate2 fluorescence in Olig2-T2A-mKate2 ES cell derived neural progenitors exposed to 500nM SAG. (D) RT-qPCR indicates Isl1 is decreased in O2e33<sup>-/-</sup> (red) cells compared to WT (black) cells differentiated under spinal cord conditions. Similarly, Olig2 and Isl1 expressing cells are reduced in mutant compared to WT. (E) Olig2, Pax6 and Nkx2.2 in transverse sections of e9.5 neural tube from WT and O2e33<sup>-/-</sup> (red, Olig2; green, Nkx2.2). (F, G) Domain size and boundary width in WT (grey) and O2e33<sup>-/-</sup> mutants (red).  $n = 6$  (WT),  $n = 12$  (O2e33), Mann-Whitney test  $p = 0.004$ . The p3-pMN boundary is wider in O2e33<sup>-/-</sup> mutants compared to WT (Mann-Whitney test  $p = 0.009$ ). (H) Isl1 and Hb9 expressing motor neurons are reduced in O2e33<sup>-/-</sup> embryos compared to WT. (I) Chx10 expressing V2 neurons increase in the O2e33<sup>-/-</sup> mutant. Scale bars = 100 $\mu$ m. (J) Simulations of the O2e33<sup>-/-</sup> model recapitulate *in vivo* observations of a narrower pMN domain and decreased precision of the p3-pMN boundary. (K, L) Boundary width (I) and position (H) from simulations (box plot shows upper and lower quartile and mean;  $n = 10$  (WT);  $n = 10$  (O2e33), Mann-Whitney test  $p = 0.0001$  for both).

**Figure 3**

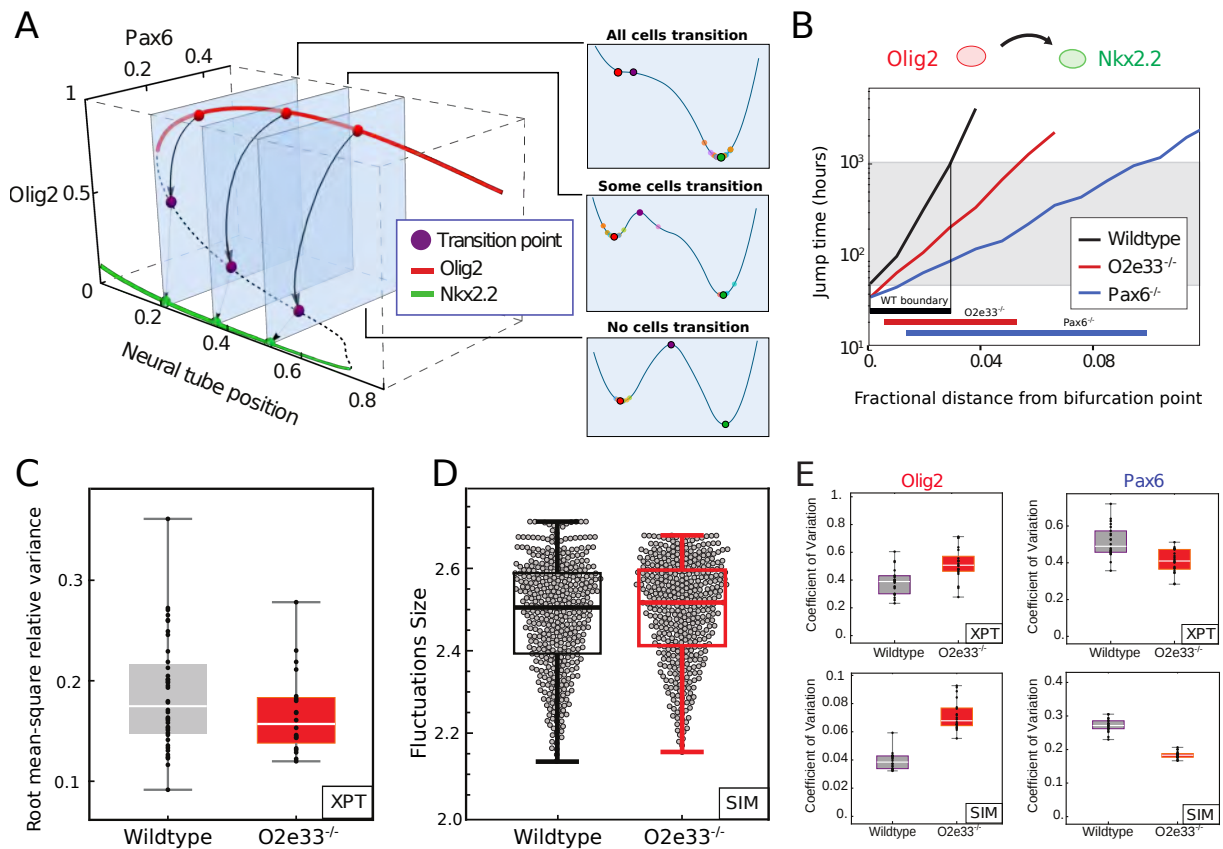

Figure 3: **The rate of transition between progenitor states is determined by the GRN structure.** (A) A 3D bifurcation diagram illustrates bistability for pMN (red; expressing Olig2 and Pax6) and p3 (green; expressing Nkx2.2) with a transition point (unstable fixed point of dynamics, purple). Noise driven transition pathway from pMN to p3 is indicated by black arrows. Panels (right) represent the transitions as one-dimensional Waddington landscape sketches. (B) Fate jump times calculated from simulations: pMN to p3 in WT (black), Pax6<sup>-/-</sup> (blue) and O2e33<sup>-/-</sup> mutants (red). Fractional distance refers to distance from the bifurcation point. Grey shading indicates where transitions can occur on developmental timescales. (C) Total variance in gene expression per embryo (Olig2 and Pax6) within pMN domain for WT (grey) and O2e33<sup>-/-</sup> embryos (red). Relative root-mean-square variance of WT and O2e33<sup>-/-</sup> embryos captures total noise of the system. No significant change in noise levels between genotypes ( $p > 0.05$ , Mann-Whitney test). (D) Measurements of noise *in silico* in the pMN domain in WT and O2e33<sup>-/-</sup>, each grey point is an individual configuration (Supplemental Section C, Mann-Whitney test  $p > 0.05$ ). (E) Coefficient of variation for Olig2 (left) and Pax6 (right) in WT (grey) and O2e33<sup>-/-</sup> (red) from experimental data (top) and *in silico* simulations (bottom).

**Figure 4**

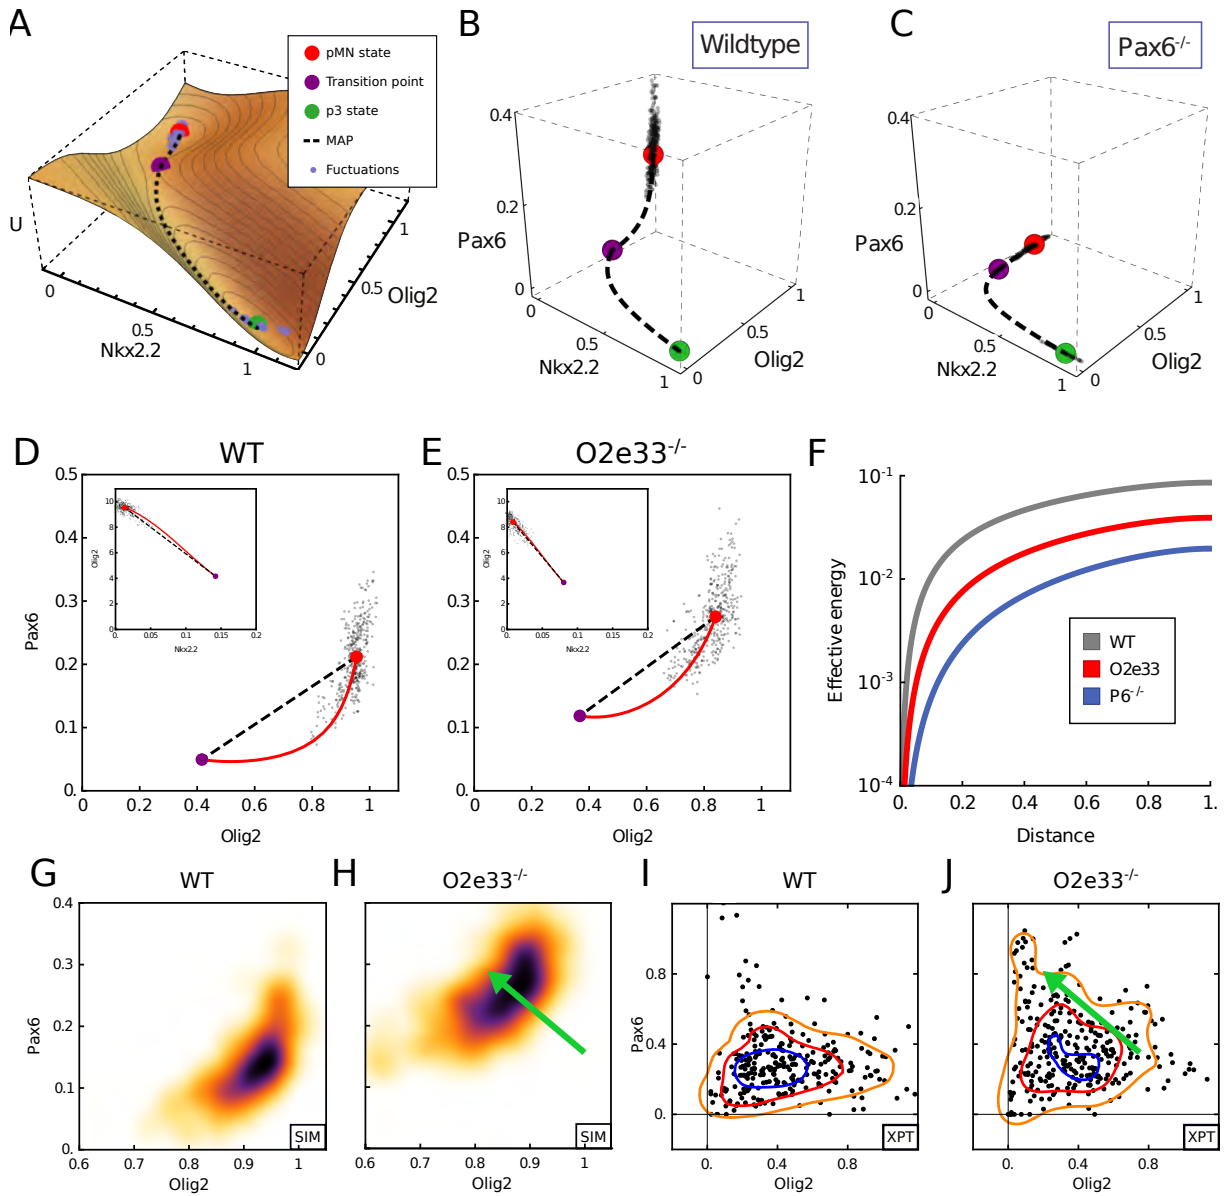

Figure 4: **Mutant phenotypes affect the configuration of gene expression fluctuations.** (A) A quasi-potential ( $U$ ) representation of the neural tube dynamical system in region where noise driven transitions result in heterogeneity between pMN and p3 states. (B-C) Gene expression space view of the transition path from pMN (red point) to p3 (green point) steady states via the transition point (purple point). Simulated trajectory (dots) shows stochastic fluctuations from the pMN steady state. Axes show relative expression levels. WT (left) and Pax6<sup>-/-</sup> (right) for neural tube position at fraction 0.1 of total neural tube length dorsal to the bifurcation point. (D-E) Projection into Olig2-Pax6 gene expression space of the minimum action path (red) predicted from the model and simulated trajectory (dots) in WT (I) and O2e33<sup>-/-</sup> (J) at the same position as G-H. Insets show projection onto Nkx2.2-Olig2 axes. (F) Effective energy barrier (cumulative action) for noise-induced transitions, plotted along the transition path (normalised to unit length) at the same neural tube positions as G-J. WT (grey) has a higher barrier than O2e33<sup>-/-</sup> (red), leading to longer jump times; O2e33<sup>-/-</sup> in turn has a higher barrier than Pax6<sup>-/-</sup> (blue). (G-H) Simulated Pax6 and Olig2 expression levels (black dots) for WT and O2e33<sup>-/-</sup> in regions proximal to the p3-pMN boundary. (I-J) A shift to higher levels of Pax6 and reduced levels of Olig2 is observed in cells from O2e33<sup>-/-</sup> mutants *in vivo* compared to controls. Axes show fluorescence intensity (arbitrary units). Contour lines correspond to densities of the distribution of points, 0.6 (Orange), 1.6 (Red) and 2.6 (Blue).



**Figure 5**

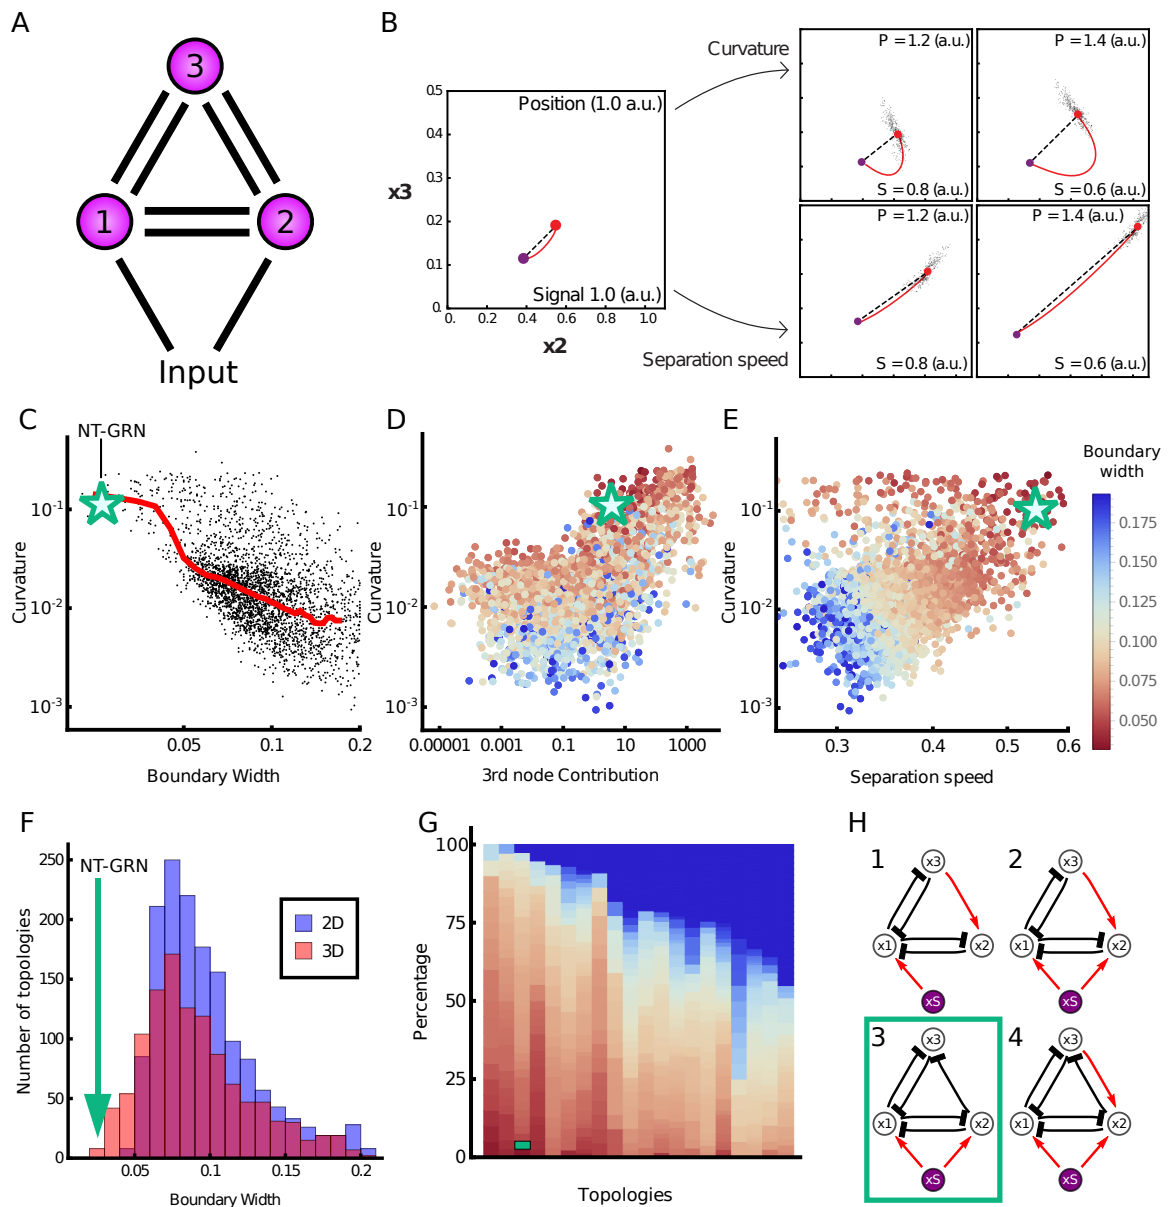

Figure 5: **Computational screen reveals the design principles of precision.** (A) Three node networks, comprising all possible interactions and a morphogen input into two nodes. (B) Two mechanisms for producing a precise boundary. Close to the boundary (Position 1.0 a.u.; Signal 1.0 a.u.) the steady state (red point) is near the transition point (purple point) in gene expression space. Further away (increasing Position; decreasing Signal) curvature of the MAP (red line) with respect to the shortest pathway (top row) or the rate at which the steady state separates from the transition point (bottom row) can contribute to increasing boundary precision. (C) For each network recovered from the screen (points), the boundary width was compared to the deviation of the MAP from the shortest path to the transition (curvature). Median value (red line) and illustrates that sharper boundaries (smaller width) tend to have higher MAP curvature. Green star represents the WT neural tube network. (D) Curvature compared to effective contribution of the third node in the network (boundary width indicated by colour of the point). (E) Curvature compared to separation speed. Colour of points by boundary width indicates both high curvature and high separation speed contribute to the sharpest boundaries. (F) Histogram of boundary width in 3D (red) and 2D (blue) networks. Green line represents the WT network. (G) The most common topologies, arranged in order of fraction of networks with precise boundaries; each column represents an individual topology. Dark blue indicates networks with a wider boundary. Topologies are shown in Fig. S16. (H) Four topologies that favour the sharpest boundaries. These networks comprise inhibition from node 2 to node 3, and lack repression from node 3 to node 2. The WT neural tube network has topology 3.

# Precision of Tissue Patterning is Controlled by Dynamical Properties of Gene Regulatory Networks

Katherine Exelby<sup>1\*</sup>, Edgar Herrera-Delgado<sup>1,2\*†</sup>, Lorena Garcia Perez<sup>1</sup>, Ruben Perez-Carrasco<sup>4</sup>, Andreas Sagner<sup>1</sup>, Vicki Metzis<sup>1</sup>, Peter Sollich<sup>2,3†</sup> and James Briscoe<sup>1†</sup>

## Supplementary Material

|     |                                                              |            |
|-----|--------------------------------------------------------------|------------|
| 770 | <b>A Supplementary Figures</b>                               | <b>S2</b>  |
| 771 | <b>B Glossary of dynamical systems terminology</b>           | <b>S5</b>  |
| 772 | <b>C Formulation and analysis of stochastic GRN dynamics</b> | <b>S10</b> |
| 773 | <b>D Protein Number Quantifications</b>                      | <b>S18</b> |
| 774 | <b>E Simulating WT and mutant GRNs</b>                       | <b>S20</b> |
| 775 | <b>F Screening three node networks for precision</b>         | <b>S26</b> |
| 776 | <b>G Materials and methods</b>                               | <b>S39</b> |
| 777 | G.1 Mouse Strains . . . . .                                  | S39        |
| 778 | G.2 Embryonic Stem Cell Culture . . . . .                    | S39        |
| 779 | G.3 CRISPR/Cas9 targeting . . . . .                          | S39        |
| 780 | G.4 Protein Copy Number Quantification . . . . .             | S40        |
| 781 | G.5 Flow Cytometry Analysis . . . . .                        | S41        |
| 782 | G.6 qPCR assays . . . . .                                    | S41        |
| 783 | G.7 Immunohistochemistry and Microscopy . . . . .            | S41        |
| 784 | G.8 Image quantification . . . . .                           | S42        |

785 **A** **Supplementary Figures**

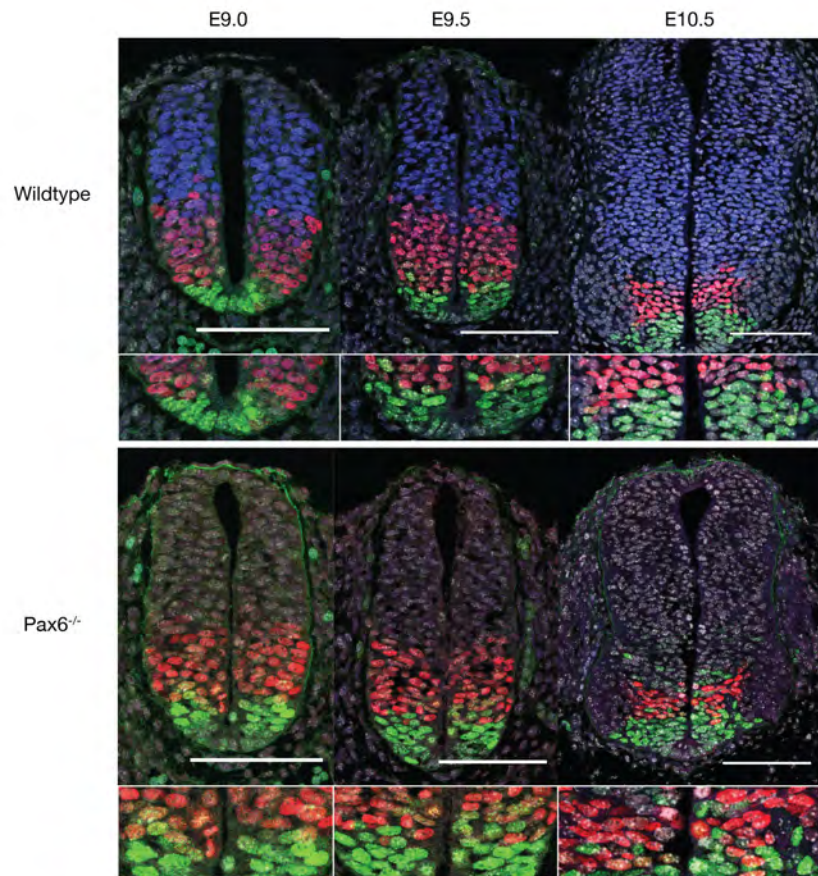

Figure S1: **pMN-p3 boundary precision decreases over time in Pax6 mutants.** Transverse sections of wildtype and Pax6<sup>-/-</sup> embryos between e9.0 and e10.5 stained for Pax6 (blue), Olig2 (red) and Nkx2.2 (green). Scale bar = 100 $\mu$ m. The pMN-p3 boundary becomes less well defined at later time points.

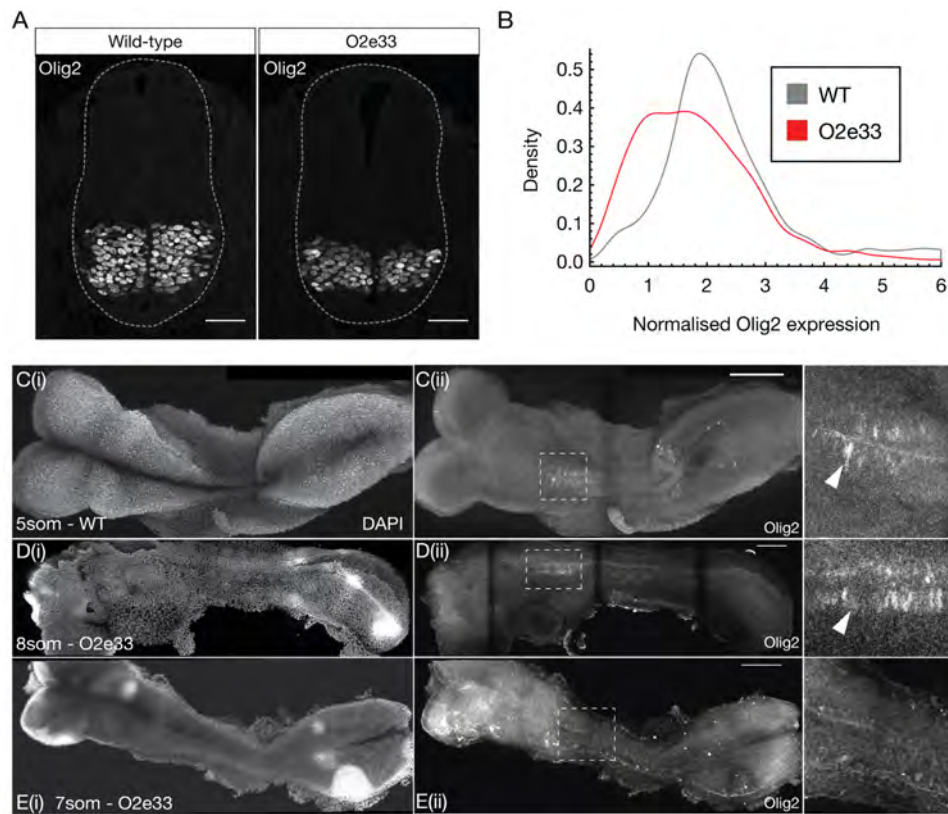

Figure S2: **Olig2 expression in O2e33<sup>-/-</sup> mutants is lower and delayed in onset.** (A) Transverse brachial sections of e9.5 WT and O2e33<sup>-/-</sup> embryos stained for Olig2. The O2e33<sup>-/-</sup> embryo has a smaller Olig2 domain with reduced expression levels. Scale bar = 50 μm (B) Normalised Olig2 expression for single cells in WT and O2e33<sup>-/-</sup> embryo sections. (C, D, E) Wholemount images of WT (C) and O2e33<sup>-/-</sup> mutants (D, E) for DAPI (i) and Olig2 staining (ii-iii). Expression of Olig2 in wildtype is observed at 5 somites but in O2e33<sup>-/-</sup> Olig2 onset occurs later at 8 somites. Olig2 is not observed in O2e33<sup>-/-</sup> embryos at 7 somites. Scale bar = 100 μm

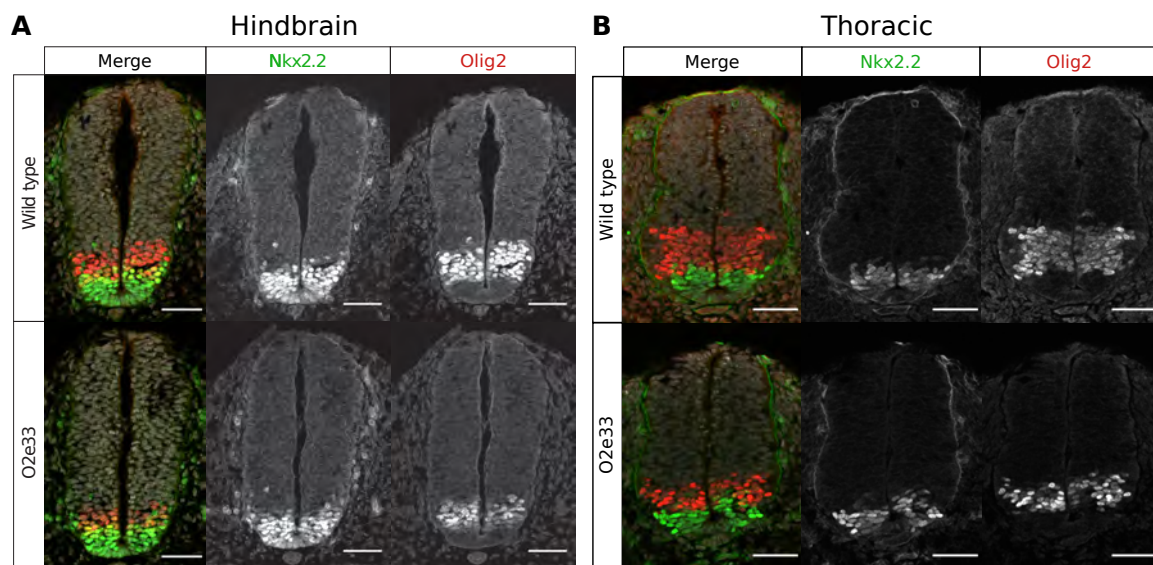

Figure S3: **Transverse sections of the hindbrain (A) and thoracic region (B) e9.5 wildtype and O2e33<sup>-/-</sup> embryos** Stained for Olig2 (red) and Nkx2.2 (green). Scale bar = 50. (A) Hindbrain: The pMN domain is smaller and the pMN-p3 boundary is less well defined in O2e33<sup>-/-</sup> mutant embryos. (B) Thoracic region: The pMN domain is smaller and there is more intermixing between pMN and p3 cells in O2e33<sup>-/-</sup> mutant embryos.

## 786 B Glossary of dynamical systems terminology

787 The terms in this glossary come from the field of dynamical systems theory and more detail  
788 can be found in [Kuznetsov, 2008, Strogatz, 2014]. We then also use elements relating to  
789 stochastic processes for which further information can be found in e.g. [Van Kampen, 2007].

### 790 • **Deterministic system**

791 Deterministic systems are those that involve no randomness and will therefore *always*  
792 behave in the exact same way when started from the same conditions. In this study  
793 deterministic systems model the production and degradation of genes in the absence of  
794 any stochasticity.

### 795 • **Stochastic systems**

796 These are systems of equations that incorporate randomness such that the system *will not*  
797 behave the same way every time. In our study, these are derived from the **deterministic**  
798 **system** by adding a stochastic element to form a **Chemical Langevin Equation**.

### 799 • **Chemical Langevin Equation**

800 The Langevin equation was derived by Paul Langevin as an equation that approximates  
801 the randomness generated by individual processes and has been adapted to describe  
802 chemical reaction systems [Lemons and Gythiel, 1997, Gillespie, 2000]. It assumes  
803 each individual reaction in a system takes place with Gaussian noise and has been  
804 shown to be accurate for systems in which the number of molecules for each component  
805 (*e.g.* transcription factor) in the system is sufficiently large. It involves incorporating  
806 **stochastic terms**, which describe the noise, into the **deterministic system**.

### 807 • **Phase space**

808 Phase space is an abstract space in which each dimension represents the concentration  
809 of one of the components (transcription factors) of the gene regulatory network. This  
810 allows the dynamics of the GRN to be visualised geometrically, such that the change in  
811 concentration of the TFs over time traces out a line in phase space.

### 812 • **Critical points**

813 A critical point is a point in **phase space** where the **deterministic system** does not  
814 change over time. That is, the time derivative of all concentrations at a critical point is  
815 zero. These points can represent **stable fixed points** of a system, or **unstable fixed**  
816 **points**.

- 817
- 818 • **Stable fixed points** (Attractor points)  
819 A stable fixed point is a type of **critical point**. If in the immediate surroundings of  
820 a critical point the dynamics of the **deterministic system** indicate that the system  
821 moves towards the fixed point from any direction, this critical point is termed a stable  
822 fixed point. This notion is referred to as Lyapunov stability [Lyapunov, 1992]. In a  
823 “Waddington-like” landscape visualisation, stable fixed points can be thought of as the  
824 basins at the bottom of valleys. In this study, we look at systems with a maximum of  
two **stable fixed points** (Fig. S4 & S5).
- 825
- 826 • **Unstable fixed points**  
827 An unstable fixed point is also a type of **critical point**. In contrast to **stable fixed**  
828 **points**, if the analysis of the **deterministic system** shows that the system moves away  
829 from the fixed point when started some small distance away in at least one direction, the  
830 point is termed an unstable fixed point. This means that the system will only remain at  
831 this point if it is located there *exactly*. A **stochastic system** will not remain at such  
832 a point as the stochastic terms will eventually result in the system moving away along  
833 an unstable direction. In a “Waddington-like” landscape, unstable fixed points can be  
thought of as peaks or ridges from which the cell will move away.
- 834
- 835 • **Saddle point** (Transition point)  
836 A saddle point is a type of **unstable fixed point** that is attractive in at least one  
837 dimension. In the systems within this study (as in many others), saddle points separate  
838 **stable fixed points**. A system will approach a saddle point and pass through it during  
839 a transition between **stable fixed points**. In a “Waddington-like” landscape, a saddle  
840 point appears like a mountain pass between two peaks, or a saddle, hence the name  
(Fig. S4 & S5).
- 841
- 842 • **Bifurcation point**  
843 In the systems in this study bifurcation points are the positions along the morphogen  
844 gradient where the system goes from having a single **stable steady state** to being  
bistable; this means having two **stable steady states** and one **saddle point** (Fig. S4).
- 845
- 846 • **Fluctuations in concentration**  
847 In a **stochastic system** the concentrations of the molecules fluctuate *at all times* in a  
848 way described by the **Chemical Langevin Equation**. This means that a system never  
stabilises at a constant concentration, even at a **stable fixed point**. Fluctuations in



849 concentration around a stable fixed point remain and can be analysed and visualised in  
850 **phase space** (Fig. S5).

851 • **Noise driven transitions**

852 **Fluctuations in concentration** near a **stable fixed point** move the state of the  
853 system away from the **stable fixed point** in phase space. This can result in the system  
854 reaching a **saddle point** and as a consequence transitioning from the original **stable**  
855 **fixed point** to the basin of attraction of a different **stable fixed point**. This process  
856 is a noise driven transition (Fig. S4 & S5).

857 • **Minimum Action Path (MAP)**

858 From the equations for the **stochastic system** it is possible to calculate the most likely  
859 path that a system will take to complete a transition from one **stable fixed point** to  
860 another [Kleinert, 2009, Bunin et al., 2012]. This is termed the Minimum Action Path  
861 (MAP) and can be visualised as a gene expression trajectory in the **phase space** of  
862 TF concentrations. In a “Waddington-like” landscape visualisation such paths can be  
863 thought of as the lowest paths in the landscape, which cells are most likely to follow as  
864 they move from one state to another(Fig. S5).

865 In addition, we use the following terms to describe the characteristics of a dynamical system  
866 that contribute to precise boundaries.

867 • **Curvature**

868 This is a measurement of how directly the **Minimum Action Path (MAP)** connects  
869 a **stable fixed point** to a **saddle point**. In **phase space**, the length of the **MAP** is  
870 compared with the shortest distance (straight line) between the initial **stable steady**  
871 **state** and the **saddle point**, at a fixed neural tube position. The greater the ratio  
872 between these two distances, the higher the **curvature**.

873 • **Separation speed**

874 A measurement of the Euclidean distance in **phase space** between the **stable fixed**  
875 **point** at which the system starts and the **saddle point**, at a fixed neural tube distance  
876 from the **bifurcation point** (the same neural tube position where also the **curvature**  
877 is determined). This is termed the separation speed as it indicates how fast the **stable**  
878 **fixed point** and **saddle point** separate in response to distance from the source of  
879 morphogen.

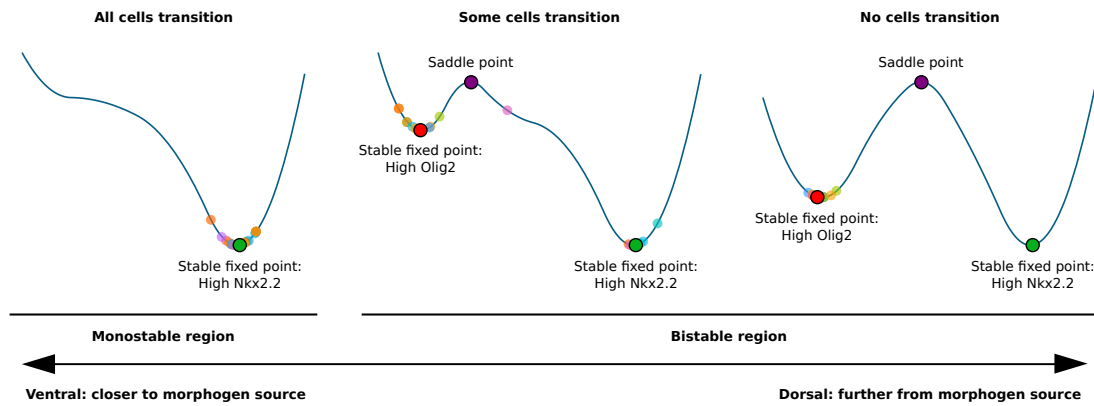

Figure S4: One-dimensional sketches of the dynamical landscape of the neural tube network at multiple dorso-ventral positions as indicated by the bottom arrow. The larger dots with black contours indicate **critical points** as labelled on the plot. The multiple smaller dots represent the final gene expression profile of different simulations of **stochastic** GRN at the same neural tube position. The stochastic nature of the systems leads to cells not following the same identical path. The leftmost plot indicates monostability for high Nkx2.2 near the ventral end of the neural tube; here all cells present high levels of Nkx2.2 as there is no other stable fixed point. In the bistable region all systems start out with high levels of Olig2 as happens in the neural tube. The middle plot represents the landscape slightly dorsal to the **bifurcation point**. The system here presents bistability so that **noise driven transitions** can occur where the system is driven to and beyond the **saddle point**; however these transitions *do not always occur*, leading to heterogeneity in fate decisions for cells at this position. The plot to the right represents cells much further dorsal of the bifurcation; here the probability of a system reaching the **saddle point** is extremely low even with stochastic terms as can be appreciated from the figure. In this region despite the existence of bistability, only the high Olig2 **stable fixed point** is observed as the probability for **noise driven transitions** to occur is vanishingly small.

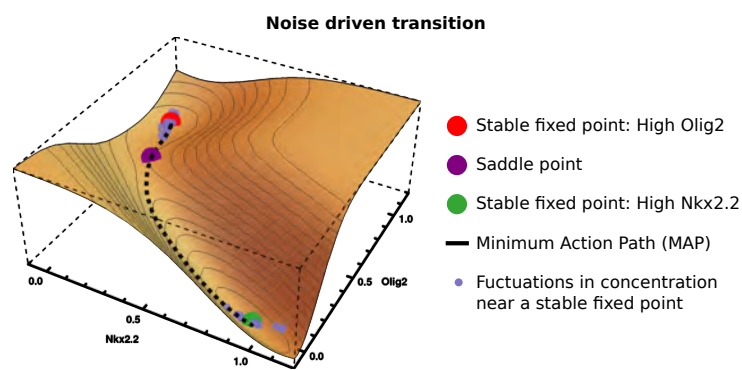

Figure S5: Representation of the dynamical landscape of the neural tube network at a region of bistability, slightly dorsal to the **bifurcation point**. The  $x$  and  $y$  axes are the concentrations of Nkx2.2 and Olig2 respectively (2D phase space), whereas the  $z$  axis represents the landscape of the system. The plot relates to the same neural tube position as the middle figure in Fig. S4, therefore there is heterogeneity in fate decisions. The colouring of the **critical points** is consistent with Fig. S4; see also the legend. The light blue dots represent two different simulations near each **stable fixed point**, illustrating **fluctuations in concentration**. The thick black line illustrates the **MAP** from the high Olig2 **stable fixed point** to the high Nkx2.2 **stable fixed point**. Note that it passes through a critical point – a saddle (purple dot).

## 880 C Formulation and analysis of stochastic GRN dynamics

881

### 882 Formulation of stochastic dynamics

883 In order to investigate heterogeneity of gene expression in the neural tube we made use of  
 884 stochastic differential equations that describe the GRN and in particular the time evolution of  
 885 the concentration  $x_j$  of each TF  $j$ . We start with a thermodynamic-like model as detailed in  
 886 [Cohen et al., 2014], which captures the macroscopic behaviour by a system of ODEs; these  
 887 contain terms for production and decay of each TF. The ODE description corresponds to  
 888 the limit of a reaction volume  $\Omega$  that is large enough for the copy numbers  $\Omega x_j$  of all protein  
 889 species to be large, allowing fluctuations to be neglected; formally one takes  $\Omega \rightarrow \infty$ . When  $\Omega$   
 890 is finite, stochastic effects occur. These can be described by the chemical Langevin equation,  
 891 a system of SDEs, see e.g. [Van Kampen, 2007, Gillespie, 2000]. The drift, *i.e.* the systematic  
 892 variation with time in the SDEs coincides directly with the deterministic limit. The diffusion  
 893 (stochastic) term arises from the stochastic nature of the individual protein production and  
 894 decay reactions; it is a Gaussian white noise [Gillespie, 2000] whose covariance structure is  
 895 determined by the mean reaction rates. In our case the chemical Langevin equation for the  
 896 protein levels  $x_j$  within the GRN takes the form:

$$\frac{d}{dt}x_j = \sum_{\mathbf{n}} p_{(j,\mathbf{n})} \alpha_{(j,\mathbf{n})} - x_j \beta_j + \Omega^{-1/2} \epsilon_j(t) \quad (\text{C.1a})$$

$$p_{(j,\mathbf{n})} = \frac{k_{(j,\mathbf{n})} \prod_i x_i^{n_i}}{\sum_{\mathbf{n}'} k_{(j,\mathbf{n}')} \prod_i x_i^{n'_i}}$$

$$D_{ij} = \delta_{ij} \left[ \sum_{\mathbf{n}} p_{(j,\mathbf{n})} \alpha_{(j,\mathbf{n})} + x_j \beta_j \right] \quad (\text{C.1b})$$

$$\langle \epsilon_i(t) \epsilon_j(t') \rangle = \delta(t - t') D_{ij} \quad (\text{C.1c})$$

897 The deterministic part of these equations is equivalent to those used in [Cohen et al., 2014].  
 898 The covariance (C.1b,C.1c) of the zero mean Gaussian white noise  $\epsilon_j(t)$  arises from the decay  
 899 and production of each protein being independent and random, given the concentration of the  
 900 regulators of the relevant gene. In the equations above,  $\alpha$  represents protein production rate  
 901 and  $\beta$  degradation rate, while the  $w$  provide the weights of the respective DNA conformations  
 902  $(j, \mathbf{n})$  when multiplied by the respective concentration. The conformations are labelled by  
 903 the protein  $j$  being produced and the numbers  $\mathbf{n} = \{n_i\}$  of TF molecules bound. The  $\delta$  in  
 904 (C.1b) and (C.1c) are the Kronecker and Dirac delta respectively. As explained above,  $\Omega$  is  
 905 the volume of the system in which all reactions take place.

906 When looking at the chemical Langevin equation (C.1a), one notices that the rate  $\sum_{\mathbf{n}} p_{(j,\mathbf{n})} \alpha_{(j,\mathbf{n})}$   
 907 for producing protein  $j$ , has a nonlinear dependence on the TF concentrations  $x_i$ . One might  
 908 be concerned that with such a nonlinear dependence, modelling production of protein  $j$  as  
 909 a single reaction is too simplistic. However, (C.1a) can be obtained from a larger system  
 910 of simple unary and binary mass action reactions, in which the concentration of each DNA  
 911 conformation is kept track of individually. We only sketch this construction here and explain  
 912 its implications for the stochastic terms in (C.1a); for further details see [Herrera-Delgado  
 913 et al., 2018]. The deterministic part of the time evolution of the DNA concentrations is given  
 914 as follows:

$$\frac{d}{dt} x_{(j,\mathbf{n})} = \gamma \sum_p \left( k_{(j,\mathbf{n}-e_p)}^{p+} x_{(j,\mathbf{n}-e_p)} x_p - k_{(j,\mathbf{n})}^{p+} x_{(j,\mathbf{n})} x_p + k_{(j,\mathbf{n}+e_p)}^{p-} x_{(j,\mathbf{n}+e_p)} - k_{(j,\mathbf{n})}^{p-} x_{(j,\mathbf{n})} \right) \quad (\text{C.2})$$

915 Here  $x_{(j,\mathbf{n})} = \tilde{x}_{(j,\mathbf{n})}/\gamma'$  tracks the concentration of each DNA conformation and is scaled  
 916 down by a large factor  $\gamma'$  to account for the low quantity of binding sites in relation to protein  
 917 numbers. Correspondingly the protein production rate constants  $\alpha_{(j,\mathbf{n})} = \gamma' \tilde{\alpha}_{(j,\mathbf{n})}$  have to be  
 918 large in order to give an appreciable overall rate of protein production nonetheless.

919 To derive the correct stochastic equations for the protein species, the large  $\gamma$ -limit of (C.2)  
 920 is taken: the concentration of each DNA conformation then changes sufficiently quickly that it  
 921 constantly tracks the instantaneous protein concentrations. For appropriately chosen binding  
 922 and unbinding rate constants  $k_{(j,\mathbf{n})}^{p+}$  and  $k_{(j,\mathbf{n})}^{p-}$  this leads back to the thermodynamic-like form  
 923 of the *deterministic* part of the protein dynamics in (C.1a) [Herrera-Delgado et al., 2018]. As  
 924 shown in [Thomas et al., 2012] the existence of fast species (in our case, DNA conformations)  
 925 can lead to additional terms arising in the *noise* acting on the slow species (protein production),  
 926 as a consequence of reactions between slow and fast species. In our case it turns out that these  
 927 extra noise terms scale with  $\gamma'/\gamma$ . We then make use of the biological meaning of the terms:  
 928  $1/\gamma$  represents the timescale of reaction rates for TF binding to DNA and  $1/\gamma'$  represents the  
 929 characteristic time for the process of going from active DNA to producing a protein. We find it  
 930 biologically reasonable to choose a  $1/\gamma$  that is substantially smaller than  $1/\gamma'$ , given the many  
 931 biological processes necessary for the production of a fully functional protein. The ratio  $\gamma'/\gamma$  is  
 932 then small so that the additional noise terms that arise from the general calculation in [Thomas  
 933 et al., 2012] become negligible, leaving exactly the noise terms in (C.1c). The intuition is that  
 934 because protein production is slow compared to binding and unbinding of factors to DNA, noise  
 935 from the many binding and unbinding events during production averages out; the overall noise  
 936 then arises only from the stochasticity of the production processes, at the relevant average  
 937 DNA concentrations. We note that in accordance with this conclusion, explicit calculations

938 show that when  $\gamma'$  is of the order of  $\gamma$  or larger, additional noise terms from the stochasticity  
939 in DNA concentrations do enter the dynamics of the protein concentrations. Moreover, these  
940 additional terms are dependent on the precise choices of binding and unbinding rates, which  
941 are only partially constrained by the requirement that the thermodynamic-like deterministic  
942 equations (C.1a) are retrieved for large  $\gamma$  [Herrera-Delgado et al., 2018].

## 943 **Amount of noise**

944 The noise level in our model is set by  $\Omega^{-1}$ , the inverse reaction volume. This determines the  
945 scale of the stochastic fluctuations in protein production and decay, both of which the model  
946 represents as single step processes. A larger  $\Omega$  thus leads to smaller stochastic effects. In  
947 equation (C.1a), multiplying  $\Omega$  by the concentration of a protein species gives the number of  
948 molecules for that protein. In our calculations we measure volumes in units that make typical  
949 protein concentrations of order unity, so that  $\Omega$  can be interpreted as a copy number. In  
950 accordance with our observations in (Supp. D), a value for  $\Omega$  can be read as a copy number  
951 for Pax6, Nkx2.2 and Irx3; the corresponding typical copy numbers for Olig2 are ten times  
952 higher (Supp. D).

953 However, the model is a coarse-grained description that does not explicitly describe the  
954 many possible sources of noise within a living cell. These include spatial heterogeneity and  
955 effects from the bursty, multi-step nature of protein production, which includes processes  
956 such as transcription, translation, post-translational modification, protein folding and protein  
957 shuttling [McAdams and Arkin, 1997]. As noted in [Van Kampen, 2007] and as implemented  
958 in [Wang et al., 2007, Zhang et al., 2012, Li and Wang, 2013],  $\Omega$  relates inversely to the  
959 magnitude of fluctuations at a macroscale. It therefore represents the combined effect of all  
960 the processes involved in gene regulation and protein production that contribute to the overall  
961 system noise. Hence  $\Omega$  is an “effective” system size parameter, which incorporates all the  
962 stochastic effects in the system. Of particular relevance, mRNA molecule number is typically  
963 one thousandth that of protein number [Schwanhäusser et al., 2011]. Consistent with this we  
964 have found an average of  $\sim 100,000$  Olig2 protein molecules/cell but only  $\sim 40$  Olig2 mRNA  
965 molecules/cell [Rayon et al., 2019].

966 We therefore set out to estimate lower and upper bounds on the noise level  $\Omega^{-1}$ , *i.e.* the  
967 range of noise that makes sense within our description. The lower bound is given by the typical  
968 number of proteins of each species in a cell: these numbers determine the minimum amount  
969 of noise that must arise from the stochastic nature of protein production and decay. From  
970 protein quantifications (Supp. D) we obtain  $\Omega_{\max} \sim 10,000$  for the protein counts of Nkx2.2

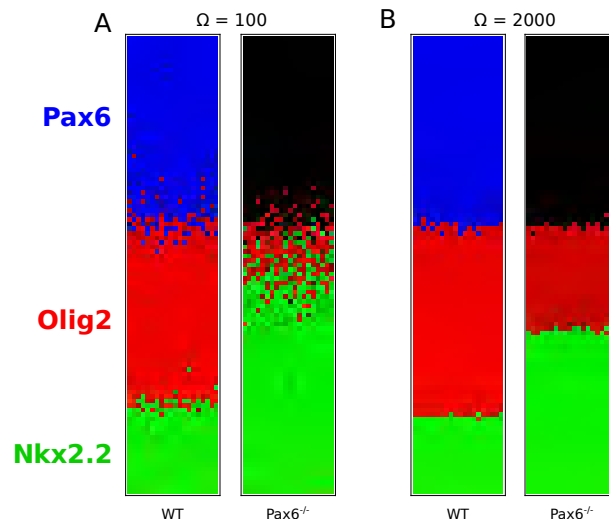

Figure S6: **Simulations of the WT and Pax6<sup>-/-</sup> stochastic models** for (A)  $\Omega = 100$ , (B)  $\Omega = 2000$ . For this range for  $\Omega$  the simulations recapitulate the observed relationship of boundary sharpness and position in WT and Pax6<sup>-/-</sup> mutants.

971 and Pax6 per cell at saturation levels (which in our model correspond to concentrations close  
972 to unity). Olig2 has a higher estimated count of  $\sim 100,000$  and in accordance a 10 times higher  
973 concentration in the model (the maximum concentration for Olig2 is 10, and 1 for the other  
974 TFs). Because of the many neglected sources of additional noise, we expect  $1/\Omega_{\max}$  to be a  
975 considerable underestimate; indeed, simulations with this noise level show almost deterministic  
976 behaviour. However, already for a slightly increased noise level ( $\Omega = 2000$ ), we find that the  
977 relationships between jump-rate differences across WT and mutant phenotypes discussed in  
978 the main text hold true (see Fig. S6). In particular, the WT presents a small amount of  
979 heterogeneity (as observed *in vivo*) and the mutants have a more heterogeneous boundary  
980 than the WT.

981 To obtain a lower bound for  $\Omega$ , we measured the coefficient of variation at steady state for  
982 all 3 TF values across embryos, to estimate the total amount of noise in the system (Fig. 1A).  
983 We then decrease  $\Omega$  in our numerical simulations until we see coefficients of variation similar  
984 to those observed *in vivo*, giving  $\Omega_{\min} = 20$ . This assumes that *all* observed differences in  
985 protein levels arise *solely* from the stochasticity in our model. We reason that there are other  
986 sources of noise that make the coefficients of variation higher *in vivo*, such as noise resulting  
987 from transcription, protein transport within the cell, antibody specificity and measurement  
988 error, so that the amount of noise contributed by the stochasticity in our dynamical model  
989 will be smaller than  $1/\Omega_{\min} = 1/20$ . On that basis we find a reasonable smallest value of  $\Omega$   
990 of  $\sim 100$ . The value we use for all results throughout this study is  $\Omega = 250$ , which is within  
991 the broad bounds of  $\Omega_{\min} = 20$  and  $\Omega_{\max} = 20,000$ . Importantly, the results we observe

992 remain qualitatively unchanged across the entire range of  $\Omega$  that we assess as reasonable,  
993  $100 \leq \Omega \leq 2000$  (Fig. S6).

994 To confirm that the effective  $\Omega$  provides a reasonable estimate of the effect of noise, we  
995 performed simulations of the GRN that incorporate the mRNA as well as the protein steps for  
996 the production of TFs as additional variables in the system. For this we use experimentally  
997 determined mRNA levels [Rayon et al., 2019]. With this addition, protein levels of between  $10^4$   
998 and  $10^5$  molecules/cell and mRNA levels of  $\sim 50$  molecules/cell recapitulate the experimentally  
999 observed variance in protein levels and the stochasticity of cell fate transitions (Fig. S7). Since  
1000 it is not our aim to add unnecessary complexity to the model, we did not include mRNA steps  
1001 in our further analyses.

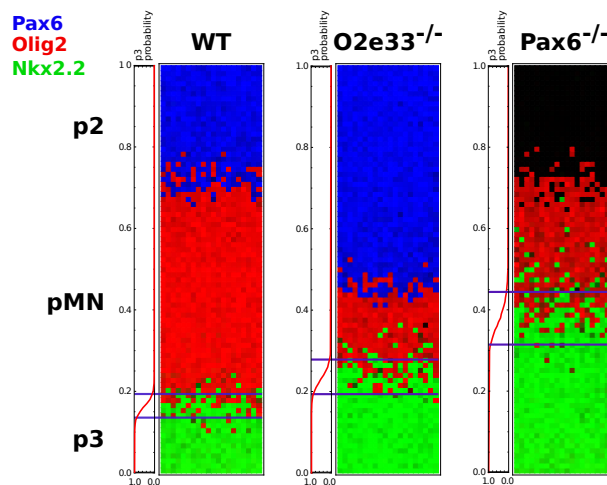

Figure S7: Stochastic simulations of the three genotypes incorporating mRNA as well as protein production. Setup consistent with the simulations shown in the manuscript, with the same colour code and top-down being dorso-ventral. The simulated model includes transcription and translation by including mRNA and protein concentrations for each TF. The simulations use a copy number of 100,000 protein/molecules per cell for Olig2 and 10,000 for the other TFs. For mRNA of Olig2, 40 molecules per cell were used, and 20 molecules for all other mRNA numbers. Parameters for transcription and translation have been extracted from experimental measurements [Rayon et al., 2019]. The lines along each simulation graph show the probability of finding a cell in the p3 state at each neural tube position, with the lines indicating the boundary width extracted from these probabilities.

## 1002 Minimum action path

1003 Much of the theoretical analysis in the main text concentrates on the stochastic transitions  
1004 between fixed points of the deterministic GRN dynamics, which are long-lived metastable  
1005 states of the stochastic dynamics. The minimum action path (MAP) is the most likely path  
1006 the system takes in such a transition (for large enough values of  $\Omega$ ), from a steady state to



1007 a transition point (which is the saddle point of the dynamical system) and then onwards to  
1008 a new steady state. The second piece of the path always follows the deterministic dynamics  
1009 and has a negligible effect on the transition times, so we focus on the first part of the path.

1010 The negative log probability for any path is proportional to what is called the action, which  
1011 for our Langevin dynamics is of so-called Onsager-Machlup form [Kleinert, 2009]. The action  
1012 is an integral over time of the Lagrangian, which in turn depends only on the current state  
1013 (vector of concentrations) and velocity of the system. The time integral can be discretised and  
1014 the action then minimised as described in e.g. [Bunin et al., 2012]. We analyse the resulting  
1015 MAP in gene expression space in order to understand how its shape affects the jump times  
1016 between steady states and thus eventually the boundary width.

1017 The typical time the system takes to reach any point on the MAP scales exponentially  
1018 with the action up to that point, hence this quantity can be interpreted as an effective energy,  
1019 within the analogy of a particle making a transition from one local minimum in an energy  
1020 landscape across a barrier to another minimum. In Fig. 4F we plot this effective energy along  
1021 the (relative) length of the MAP, describing the effective energy landscape governing the  
1022 transition. Fig. S8 shows an alternative representation that gives further insight: we plot the  
1023 derivative of the action along the path, which is the effective force pushing the system back  
1024 towards the initial steady state.

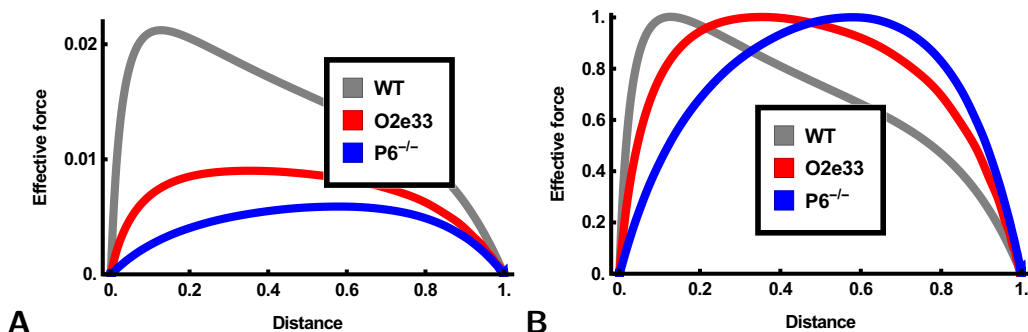

Figure S8: (A-B) Unnormalised and normalised space derivative of the action along the MAP, plotted along the length of the path. This reflects the effective force driving the system back towards its initial steady state. In the WT system (gray) the force is highest near the beginning of the path, leading to a noticeably skewed plot, while the O2e33<sup>-/-</sup> (red) and Pax6<sup>-/-</sup> (blue) more nearly symmetric force profiles. The high initial force in WT responsible for the large typical jump times in the system, and is related to the significant curvature of the MAP away from the straight line between initial steady state and transition point (Fig. 4D-F)

## 1025 Calculating magnitude of fluctuations

To compare the magnitude of fluctuations between WT and mutants *in silico* we take two separate approaches. The first is to consider fluctuations in expression levels around a steady state, before any transition to a new state occurs. For moderate noise levels such fluctuations can be analysed using a linear expansion of the dynamics around the steady state (here: pMN), leading to a local Gaussian distribution of expression levels. The corresponding covariance matrix  $C$  can be calculated from the Jacobian matrix  $J$  of the linearized dynamics and the noise covariance  $D$  as defined in (C.1b), both evaluated at the steady state. The required link between the three matrices is the Lyapunov equation, which determines  $C$  via

$$D = JC + CJ^T$$

1026 Once  $C$  has been found we normalise it by the corresponding pMN steady state values ( $X$ ),  
1027 to obtain  $\bar{C} = \text{diag}(X)^{-1}C\text{diag}(X)^{-1}$ . We finally compute the trace of  $\bar{C}$  and take the  
1028 square root. The end result is the typical standard deviation (root-mean-square fluctuation)  
1029 of the expression levels, relative to the mean expression levels. This is shown in Fig. S9A as  
1030 a function of neural tube position.

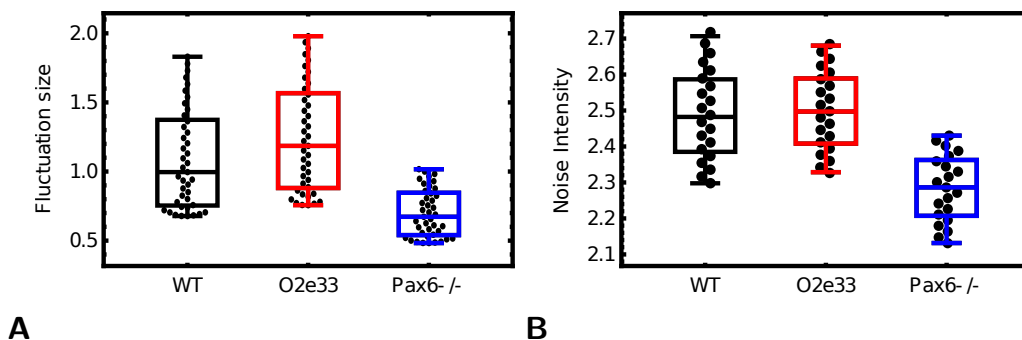

Figure S9: **Comparing total noise across genotypes** (A) Comparison of noise levels as defined by root-mean-square relative expression level fluctuations, calculated within a Gaussian approximation near the steady state. Points represent different positions along the neural tube (B) Noise levels defined as noise variance calculated at equidistant points along the MAP, at fixed fractional neural tube length from the bifurcation point. Note that in both definitions, noise levels are comparable across WT and both mutants, with slightly lower values in Pax6<sup>-/-</sup>.

1031 The second approach to quantifying noise levels is to use the noise variance, which is  
1032 the trace of the noise covariance matrix given in (C.1b). This noise variance depends on  
1033 the expression levels so we average it across equidistant points along the MAP and take  
1034 the square root of this value to obtain the root-mean-square noise level. Example results at  
1035 a specific position along the neural tube are shown in Fig. S9B; results at other positions

1036 were qualitatively the same (data not shown). Both approaches to quantifying noise show  
1037 comparable total variance across the different genotypes, with slightly lower noise in Pax6<sup>-/-</sup>  
1038 than in WT and O2e33<sup>-/-</sup>. To make the comparison to *in vivo* observations we accounted  
1039 for the fact that experimentally, noise levels are averaged across several neural tube positions  
1040 throughout the pMN domain. We therefore also performed an average *in silico* of neural tube  
1041 positions to obtain comparable data for Fig. 3D.

## 1042 D Protein Number Quantifications

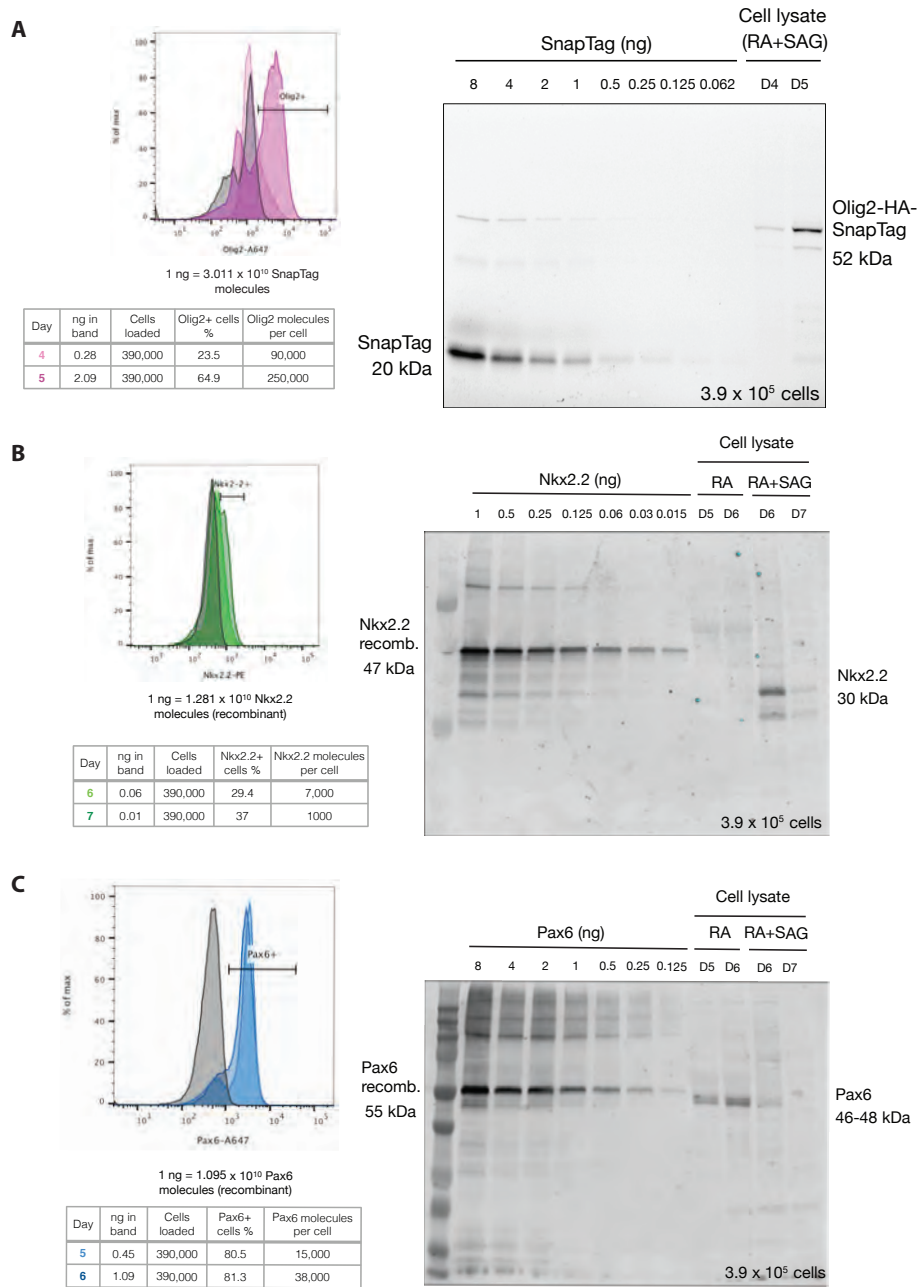

Figure S10: (Caption on next page)

Figure S10: **Quantifying Protein Copy Number** (A) Flow cytometry analysis to determine percentage of Olig2 expressing cells in differentiated ES cells at the indicated days. Table shows quantification of a gel for days 4 and 5. Olig2 has approximately a 10-fold higher protein copy number compared to Nkx2.2 and Pax6. (B) Analysis of Nkx2.2 expressing cells on days 6 and 7 of differentiation. Nkx2.2 molecules per cell calculated using the measured percentage of cells expressing Nkx2.2 and quantification of the Western blot analysis. (C) Analysis of Pax6 expressing cells to determine protein copy number at days 5 and 6 of differentiation. Pax6 molecules per cell calculated using the measured percentage of cells expressing Pax6 and quantification of the Western blot analysis.

## 1043 E Simulating WT and mutant GRNs

1044 We used the equations and parameters described in [Cohen et al., 2014] for the GRN that  
1045 patterns the neural tube; this parameter set was optimised to replicate the boundary positions  
1046 in wild-type and mutant embryos. Following the inclusion of the noise term as explained in  
1047 Supp. C we explored the effect of the initial conditions for the TFs (i.e. their initial expres-  
1048 sion levels  $x_j$ ). The aim was to find a consistent set of initial conditions that sustain the  
1049 boundary positions but also recapitulate the boundary sharpness of each mutant. The initial  
1050 conditions that satisfied these conditions were identified in a systematic scan as  $x_{\text{Pax6}} = 0.1$ ,  
1051  $x_{\text{Olig2}} = 0$ ,  $x_{\text{Nkx2.2}} = 0$ ,  $x_{\text{Irx3}} = 0.1$ . The p3-pMN boundaries in WT,  $\text{Irx3}^{-/-}$ ,  $\text{Nkx2.2}^{-/-}$   
1052 and  $\text{Olig2}^{-/-}$  simulations remained sharp as is the case *in vivo* (Fig. S11). Only the loss of  
1053 Pax6 resulted in decreased boundary sharpness. Boundary positions remained consistent with  
1054 *in vivo* observations as was the case in the original deterministic model (Fig. S11) & [Cohen  
1055 et al., 2014].

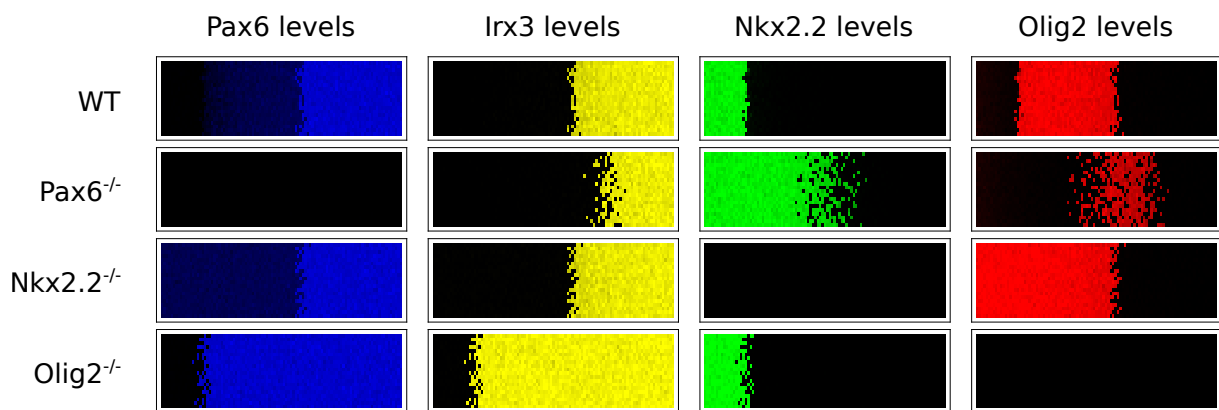

Figure S11: **Patterning phenotypes produced by stochastic simulations for WT and mutants.** Predicted expression patterns for the four TFs in the indicated genotypes are qualitatively similar to those in [Cohen et al., 2014]. Ventral to the left and dorsal to the right. Although boundary positions change, boundary precision is largely unaffected except for  $\text{Pax6}^{-/-}$ , consistent with *in vivo* experimental observations.

## 1056 Model parameters

1057 We detail the parameters used throughout the paper to model neural tube development for  
1058 equation (C.1a), and adapted for the computational screen as explained in Supp. F.

1059

| Name       | Meaning                                | Value         | Source                              |
|------------|----------------------------------------|---------------|-------------------------------------|
| $\alpha_P$ | Pax6 production rate                   | 2             | [Cohen et al., 2014]                |
| $\alpha_O$ | Olig2 production rate                  | $2 \times 10$ | [Cohen et al., 2014] & Supp. C      |
| $\alpha_N$ | Nkx2.2 production rate                 | 2             | [Cohen et al., 2014]                |
| $\alpha_I$ | Irx3 production rate                   | 2             | [Cohen et al., 2014]                |
| $\beta_P$  | Pax6 degradation rate                  | 2             | [Cohen et al., 2014]                |
| $\beta_O$  | Olig2 degradation rate                 | 2             | [Cohen et al., 2014]                |
| $\beta_N$  | Nkx2.2 degradation rate                | 2             | [Cohen et al., 2014]                |
| $\beta_I$  | Irx3 degradation rate                  | 2             | [Cohen et al., 2014]                |
| $k_{PO}$   | Olig2 binding to Pax6 DNA              | 1.9/10        | [Cohen et al., 2014] & Supp. C      |
| $k_{PN}$   | Nkx2.2 binding to Pax6 DNA             | 26.7          | [Cohen et al., 2014]                |
| $k_{ON}$   | Nkx2.2 binding to Olig2 DNA            | 60.6          | [Cohen et al., 2014]                |
| $k_{OI}$   | Irx3 binding to Olig2 DNA              | 28.4          | [Cohen et al., 2014]                |
| $k_{NP}$   | Pax6 binding to Nkx2.2 DNA             | 4.8           | [Cohen et al., 2014]                |
| $k_{NO}$   | Olig2 binding to Nkx2.2 DNA            | 27.1/10       | [Cohen et al., 2014] & Supp. C      |
| $k_{NI}$   | Irx3 binding to Nkx2.2 DNA             | 47.1          | [Cohen et al., 2014]                |
| $k_{IO}$   | Olig2 binding to Irx3 DNA              | 58.8/10       | [Cohen et al., 2014] & Supp. C      |
| $k_{IN}$   | Nkx2.2 binding to Irx3 DNA             | 76.2          | [Cohen et al., 2014]                |
| $w_{P,p}$  | Polymerase binding to Pax6 DNA         | 3.84          | [Cohen et al., 2014]                |
| $w_{O,p}$  | Polymerase binding to Olig2 DNA        | 2.01263       | Converted from [Cohen et al., 2014] |
| $w_{N,p}$  | Polymerase binding to Nkx2.2 DNA       | 0.572324      | Converted from [Cohen et al., 2014] |
| $w_{I,p}$  | Polymerase binding to Irx3 DNA         | 18.72         | [Cohen et al., 2014]                |
| $k_{O,in}$ | Gli (Shh signal) binding to Olig2 DNA  | 180           | Converted from [Cohen et al., 2014] |
| $k_{N,in}$ | Gli (Shh signal) binding to Nkx2.2 DNA | 373           | Converted from [Cohen et al., 2014] |
| $\Omega$   | System volume                          | 250           | Supp. C                             |
| $x_P(0)$   | Pax6 initial condition                 | 0.1           | Supp. E                             |
| $x_O(0)$   | Olig2 initial condition                | 0             | Supp. E                             |
| $x_N(0)$   | Nkx2.2 initial condition               | 0             | Supp. E                             |
| $x_I(0)$   | Irx3 initial condition                 | 0.1           | Supp. E                             |

Where factors of 10 have been written in the table, these arise because we have modified the model of [Cohen et al., 2014] to represent explicitly the experimental observation that Olig2 has a concentration 10 times higher than the other TFs. While this difference is immaterial for a deterministic description of the GRN dynamics, it affects the stochastic representation because larger copy numbers have smaller relative fluctuations.

The above parameters are used in the general model (C.1a) for the dynamics of the TFs  $j = P$  (Pax6),  $O$  (Olig2),  $N$  (Nkx2.2) and  $I$  (Irx3). DNA conformations are defined by the numbers  $\mathbf{n} = (n_p, n_{in}, n_P, n_O, n_N, n_I)$  of bound molecules of polymerase, Gli signal input, Pax6, Olig2, Nkx2.2, Irx3 in that order. The only allowed conformations are the empty conformation, the conformations with polymerase and  $n_{in} = 0$  or 1 signal molecule bound; and conformations with at least one molecule of the other TFs bound, with maximally two molecules from each other TF. All other conformations are assigned affinity zero. The weights

1074 for the allowed conformations are multiplicative, with bound polymerase contributing a factor  
1075  $w_{j,p}$  (see below), bound signal a factor  $k_{j,in}x_{in}$  and each TF  $i$  bound to DNA producing  
1076 TF  $j$  a factor  $k_{ji}x_i$ . Examples of the corresponding affinities are  $k_{O,(0,0,0,0,1,0)} = k_{ON}$  and  
1077  $k_{O,(0,0,0,0,0,2)} = k_{OI}^2$ . The polymerase binding parameters are directly stated as the weights  
1078  $w_{j,p} = k_{j,p}x_p$  including polymerase concentration (which is assumed constant). As detailed in  
1079 [Cohen et al., 2014], this weight describes all basal production inputs for each TF and thus  
1080 represents input from TFs such as Sox2 [Graham et al., 2003, Oosterveen et al., 2012, Peterson  
1081 et al., 2012]. Finally, the protein production rates  $\alpha_{j,n}$  in the general model (C.1a) are set  
1082 to the value given in the table for the DNA conformations with bound polymerase, and zero  
1083 otherwise.

As an explicit example of the resulting GRN equations, we write here the production rate for Olig2:

$$\frac{\alpha_O w_{O,p} (1 + k_{O,in} x_{in})}{w_{O,p} (1 + k_{O,in} x_{in}) + (1 + k_{OI} x_I)^2 (1 + k_{ON} x_N)^2} \quad (\text{E.1})$$

1084 The signal input concentration  $x_{in}$  is the gradient  $e^{-s/0.15}$ , which depends on the dorsal-ventral  
1085 neural tube position  $s$  ranging from 0 to 1 as in [Cohen et al., 2014].



## 1086 **O2e33<sup>-/-</sup> mutant**

1087 To find parameter sets that describe the behaviour of the O2e33<sup>-/-</sup> enhancer mutation, we first  
1088 identified those parameters that are related directly to the deletion of the respective enhancer.  
1089 Analysis of the sequence of the enhancer together with CHIP-seq and ATAC-seq [Oosterveen  
1090 et al., 2012, Peterson et al., 2012, Kutejova et al., 2016, Metzis et al., 2018] suggested that  
1091 Gli proteins, Nkx2.2, Irx3, and Sox2 all have a direct effect on this enhancer (Fig. 2A). We  
1092 therefore considered variations in the parameters that specify Nkx2.2 binding, Irx3 binding, Gli  
1093 binding and basal production (corresponding to Sox2 binding). We systematically explored how  
1094 reducing the parameters for each of these interactions, to a fraction  $f$  of their original value,  
1095 could explain the observed phenotype. We used a uniform distribution to perform this search  
1096 and throughout this supplementary represent the respective parameter reductions directly in  
1097 terms of the ratio  $f$  between new and original (WT) parameter values.

## 1098 **Fitting *in vitro* delay and resulting predictions**

1099 We first identified parameter sets that could replicate the observed *in vitro* delay in the onset of  
1100 Olig2 expression in the mutant, leading to a reduced parameter space (Fig. S12). In this step  
1101 we do not set any constraints to the position or precision of boundaries between expression  
1102 domains as this information cannot be extracted from the *in vitro* system. The delay in Olig2  
1103 activation was determined for networks positioned a fraction 0.3 along the neural tube, and  
1104 we retained those networks that took twice the amount of time to express Olig2 than in the  
1105 WT. The same measurement was performed at other neural tube positions and resulted in  
1106 similar distributions (data not shown).

1107 We next investigated what further phenotypical behaviour the retained parameter sets  
1108 predict, focussing on the domain size and boundary precision generated in response to a  
1109 graded Shh signal. We found that 68% of the parameter combinations reduced boundary  
1110 precision, 80% reduced the size of the pMN domain, with 83% presenting one or the other  
1111 of the phenotypes (data not shown). Here, the pMN domain size was calculated with respect  
1112 to the Shh gradient and we considered it reduced if it was below 70% of the WT size. For  
1113 determining boundary sharpness, we regarded as imprecise those systems that had a boundary  
1114 width at least twice the size of the WT; this width is calculated using the SDE system with  
1115 the thresholds described in Fig. 3B. The fact that a majority of the parameter sets identified  
1116 affected domain size and boundary precision encouraged us to generate the mouse lines.

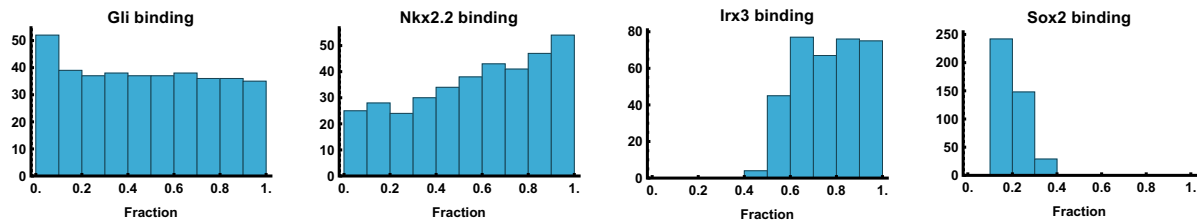

Figure S12: **Distribution of parameter changes to mimic *in vitro* O2e33<sup>-/-</sup> mutant.** To recapitulate the O2e33<sup>-/-</sup> dynamics *in vitro*, model parameters were systematically explored to identify changes that could account for the delay in onset of Olig2 expression. The graphs show the distributions of reduction factors  $f$  (x-axis) relative to WT parameter values, across parameter sets that recapitulate the delay. The (y-axis) shows number of parameter combinations that recapitulate the phenotype. The results show that what is needed to generate a delayed induction of Olig2 is a substantial reduction in Sox2 input while maintaining input of Irx3.

### 1117 Fitting *in vivo* phenotype with patterning information

1118 Once the mouse lines were generated we confirmed the delay in onset of Olig2, and noted two  
1119 additional phenotypes as expected from the initial parameter screen: a loss of precision at the  
1120 p3-pMN boundary and a ventral shift of the pMN-p2 boundary. Importantly, this *in vivo* data  
1121 allowed us to define targets regarding boundary position and precision for our fitting of the  
1122 mutant phenotype. The new targets were therefore extracted from this data, and were used  
1123 to further constrain the results displayed in Fig. S12. These additional constraints were:

- 1124 • The pMN-p3 boundary width to be at least twice the size of the WT as explained above.
- 1125 • The pMN-p3 boundary position to be between [0.17 0.25] (as the WT boundary position  
1126 is at 0.17 and some of the *in vivo* mutants show a small dorsal shift).
- 1127 • The p2-pMN position to be below or equal to 0.5 (WT boundary is at 0.55, this means  
1128 a reduction of the domain size of at least 15% with respect to WT) but higher than the  
1129 pMN-p3 boundary position, such that the pMN domain does not disappear.
- 1130 • Other aspects of patterning not to be disturbed.

1131 The resulting retained networks present a substantially reduced parameter space and are shown  
1132 in Fig. S13. From these parameter sets we took a representative point as our model for the  
1133 O2e33<sup>-/-</sup> mutant; as expected this replicates the observed experimental phenotypes.

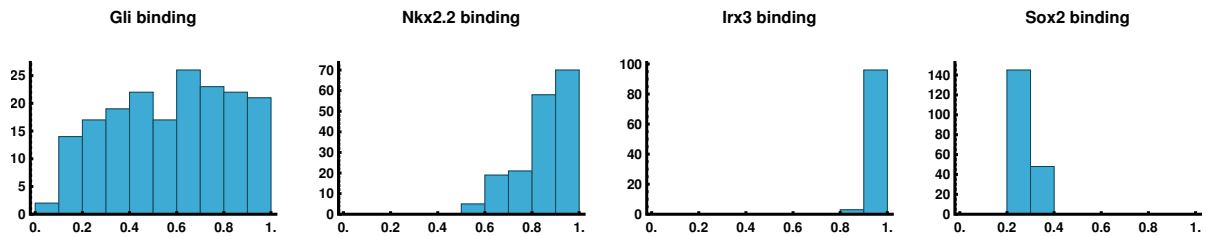

Figure S13: **Distribution of parameter changes to mimic *in vivo* O2e33<sup>-/-</sup> mutant.** Equivalent histograms to Fig. S12 with the additional constraints from *in vivo* observations: ventral shift of pMN-p2 boundary *and* broad p3-pMN boundary. The main results are: maintaining WT levels of Irx3 input; substantial reduction in Sox2 input, some reduction in Gli input but with a broad distribution, and a mild reduction in Nkx2.2 input.

## 1134 F Screening three node networks for precision

### 1135 Defining a functional form

1136 To perform a parameter screen we explored three node networks with all possible interactions  
1137 between the nodes, as this has provided useful insights in other systems (Fig. 1A) [Cotterell  
1138 and Sharpe, 2010, Leon et al., 2016]. For the purpose of exploring different dynamics, we  
1139 enumerated the different possible transcriptional/occupancy states of the promoter to model  
1140 the production rates of a given protein. These rates depend on polymerase availability, signal  
1141 input (morphogen) and regulating transcription factors, with concentrations  $x_p$ ,  $x_{in}$  and  $x_i$   
1142 respectively. The transcription factors  $i$  can be activating ( $i \in \mathcal{P}$ ) or repressing ( $i \in \mathcal{N}$ ), with  
1143  $\mathcal{P}$  and  $\mathcal{N}$  denoting the sets of activating and repressing transcription factors, respectively.  
1144 While in the previous model, in its most general form (C.1a), different protein production  
1145 rates can be used for different DNA conformations, in the neural tube network we used the  
1146 same production rate for all protein-producing input conformations (see Supp. E). We adopt  
1147 the same approach here and set the production rate to unity in appropriate units of time; thus  
1148 the model is specified only by the binding affinities of the various DNA conformations. Without  
1149 loss of generality we fixed the affinity (and hence the weight) of the unbound conformation to  
1150 1 as explained in [Sherman and Cohen, 2012]. We assign the weights of conformations with  
1151 only one bound molecule as  $k_p x_p$ ,  $k_{in} x_{in}$  and  $k_i x_i$ . In accordance with our previous model  
1152 (C.1a), we set the following constraints:

- 1153 • All conformations with polymerase and without any repressor  $i \in \mathcal{N}$  produce protein; it  
1154 does not matter whether signal or any activator  $i \in \mathcal{P}$  are bound.
- 1155 • Conformations that have one or more repressor  $i \in \mathcal{N}$  bound together with either  
1156 signal, polymerase or any activator  $\mathcal{P}$  are excluded, based on the assumption that these  
1157 molecules compete for the same binding site
- 1158 • Binding of signal or any activator  $\mathcal{P}$  enhances binding of polymerase
- 1159 • No other cooperativity effects are present

### 1160 Expressions for conformation states

1161 The only states that can produce protein are those with polymerase bound. For brevity we  
1162 follow the convention in Supp. E and abbreviate

$$w_p = k_p x_p \quad (\text{F.1})$$

1163 in the following, taking polymerase levels as constant throughout our dynamics. As specified  
 1164 above, the only states that can bind polymerase are those that have no repressors bound. We  
 1165 assume no cooperativity between signal  $x_{\text{in}}$  and activators  $x_i, i \in \mathcal{P}$ , hence the total weight of  
 1166 states that can potentially bind polymerase (assuming two binding sites per activator  $i \in \mathcal{P}$   
 1167 but only one for the signal) is:

$$(1 + k_{\text{in}}x_{\text{in}}) \prod_{i \in \mathcal{P}} (1 + k_i x_i)^2 \quad (\text{F.2})$$

1168 Given that repressors  $\mathcal{N}$  can only bind by themselves, and that there is no other cooperativity  
 1169 between the inputs, the total weight for conformations with at least one repressor  $\mathcal{N}$  bound  
 1170 while assuming two binding sites per repressor  $i \in \mathcal{N}$  is:

$$-1 + \prod_{i \in \mathcal{N}} (1 + k_i x_i)^2 \quad (\text{F.3})$$

1171 In accordance with biological intuition, polymerase is recruited by activators  $\mathcal{P}$  or signal.  
 1172 The simplest way to implement this is to increase the weight of conformations having both  
 1173 polymerase and at least one activator  $i \in \mathcal{P}$  or signal by a cooperativity factor  $c$ , giving a total  
 1174 weight of:

$$c w_p [-1 + (1 + k_{\text{in}}x_{\text{in}}) \prod_{i \in \mathcal{P}} (1 + k_i x_i)^2] \quad (\text{F.4})$$

1175 Finally, the weight for the unbound (empty) conformation is taken as 1, as explained above,  
 1176 and for the conformation with one polymerase bound it is  $w_p$  as defined in (F.1). The total  
 1177 weight, i.e. the denominator of the protein production rate, is then

$$w_p + c w_p [-1 + (1 + k_{\text{in}}x_{\text{in}}) \prod_{i \in \mathcal{P}} (1 + k_i x_i)^2] + (1 + k_{\text{in}}x_{\text{in}}) \prod_{i \in \mathcal{P}} (1 + k_i x_i)^2 - 1 + \prod_{i \in \mathcal{N}} (1 + k_i x_i)^2 \quad (\text{F.5})$$

1178 while the numerator is the total weight of conformations *with* polymerase, either on its own  
 1179 (F.1) or together with activators or signal (F.4), giving overall for the production rate (which  
 1180 with protein production set to unity is also the probability of being in a DNA conformation  
 1181 that produces protein)

$$\frac{w_p + c w_p [-1 + (1 + k_{\text{in}}x_{\text{in}})\phi]}{w_p + c w_p [-1 + (1 + k_{\text{in}}x_{\text{in}})\phi] + (1 + k_{\text{in}}x_{\text{in}})\phi + \psi - 1} \quad (\text{F.6})$$

1182 with the abbreviations

$$\phi = \prod_{i \in \mathcal{P}} (1 + k_i x_i)^2, \quad \psi = \prod_{i \in \mathcal{N}} (1 + k_i x_i)^2 \quad (\text{F.7})$$

## 1183 General strong cooperativity limit

1184 It will be convenient in the following to write the effective affinities of signal and activating  
 1185 TFs in combination with polymerase in a form that includes the cooperativity effect from the  
 1186 factor  $c$ , i.e. in terms of  $\tilde{k}_{\text{in}} = ck_{\text{in}}$  and  $\tilde{k}_i = ck_i$  for  $i \in \mathcal{P}$ . The protein production rate is  
 1187 then expressed as

$$\frac{w_p + cw_p[-1 + (1 + \tilde{k}_{\text{in}}x_{\text{in}}/c)\phi]}{w_p + cw_p[-1 + (1 + \tilde{k}_{\text{in}}x_{\text{in}}/c)\phi] + (1 + \tilde{k}_{\text{in}}x_{\text{in}}/c)\phi + \psi - 1} \quad (\text{F.8})$$

1188 with now

$$\phi = \prod_{i \in \mathcal{P}} (1 + \tilde{k}_i x_i / c)^2 \quad (\text{F.9})$$

1189 We can now compare with the analogous expression (E.1) in the neural tube network. There  
 1190 all interactions are repressive so that  $\mathcal{P}$  is the empty set and hence  $\phi = 1$ , which simplifies  
 1191 (F.8) to

$$\frac{w_p(1 + \tilde{k}_{\text{in}}x_{\text{in}})}{w_p(1 + \tilde{k}_{\text{in}}x_{\text{in}}) + \tilde{k}_{\text{in}}x_{\text{in}}/c + \psi} \quad (\text{F.10})$$

1192 This agrees with (E.1) except for the middle term in the denominator, which represents the  
 1193 weight of DNA conformations with only signal but no polymerase bound. Its absence in  
 1194 the neural tube network formally corresponds to the strong cooperativity limit  $c \rightarrow \infty$ . In  
 1195 our screen we use a finite cooperativity  $c = 100$  to avoid the extreme case of excluding  
 1196 conformations with only signal bound completely; this value of  $c$  is still large enough, however,  
 1197 to replicate the dynamics of the neural tube network. We thus take (F.8) with  $c = 100$  as the  
 1198 form of protein production rates in our screen; compared to the neural tube case this allows  
 1199 us to include both activating and repressive interactions.

Adding a protein decay term (with unit decay rate) and stochastic fluctuations, the dynamics of the three-node networks in our screen, with protein levels  $x_1$ ,  $x_2$  and  $x_3$ , is thus described by

$$\begin{aligned} \frac{d}{dt}x_j &= \frac{w_{j,\text{p}} + cw_{j,\text{p}}[-1 + (1 + k_{j,\text{in}}x_{\text{in}}/c)\phi_j]}{w_{j,\text{p}} + cw_{j,\text{p}}[-1 + (1 + k_{j,\text{in}}x_{\text{in}}/c)\phi_j] + (1 + k_{j,\text{in}}x_{\text{in}}/c)\phi_j + \psi_j - 1} - x_j \quad (\text{F.11}) \\ \phi_j &= \prod_{i \neq j} (1 + [k_{ji}]_+ x_i / c)^2 \\ \psi_j &= \prod_{i \neq j} (1 + [k_{ji}]_- x_i)^2 \end{aligned}$$

1200 for  $j = 1, 2, 3$ ; compared to (F.8) we have dropped all tildes to unclutter the notation. We  
 1201 have also allowed the sets  $\mathcal{P}$  and  $\mathcal{N}$  of activating and repressing transcription factors to be  
 1202 determined implicitly by the system parameters. This is done by generalizing the affinities  $k_{ji}$

1203 so that a positive sign indicates an activation of  $j$  by  $i$  and a negative sign a repression. The  
1204 corresponding switching of species  $i$  between the products over activators and repressors is  
1205 achieved mathematically by setting  $[k]_+ = \max(k, 0)$  and  $[k]_- = \max(-k, 0)$ .

1206 To mimic the structure of the neural tube network, we assume that only proteins 1 and  
1207 2 have direct signal inputs, while 3 does not, so that  $k_{3,\text{in}} = 0$ . This leaves 11 network  
1208 parameters: 2 for the signal (gradient) inputs from the gradient ( $k_{1,\text{in}}$  into node 1 and  $k_{2,\text{in}}$   
1209 into node 2), 6 from the interactions between TFs ( $k_{12}$ ,  $k_{13}$ ,  $k_{21}$ ,  $k_{23}$ ,  $k_{31}$  and  $k_{32}$ ) and 3 for  
1210 polymerase binding weights ( $w_{1,\text{p}}$ ,  $w_{2,\text{p}}$  and  $w_{3,\text{p}}$ ).

## 1211 Parameter exploration

1212 We explored the 11 dimensional parameter space specified above using a uniform log distribu-  
1213 tion ( $\log_{10}$ ), where the ranges are set differently depending on the parameter. Specifically we  
1214 chose the ranges as:  $\text{range}(k_{\text{in}}) = [10 : 400]$ ,  $\text{range}(w_{\text{p}}) = [0.1 : 10]$ ,  $\text{range}(k_{ji}) = [-100 :$   
1215  $-1] \cup [1 : 100]$  with the sign of each regulation  $k_{ji}$  being chosen randomly.

1216 We provide a schematic in Fig. S14 of the sequential steps taken to screen for relevant  
1217 networks, analyse them and classify them into topologies. We explored parameter combinations  
1218 for a three node network defined in the form (F.11). The main criterion for choosing a viable  
1219 set of parameters was that they must produce a patterned steady state, i.e. a saddle-node  
1220 bifurcation on the same gradient as in the neural tube, defined as  $x_{\text{in}} = e^{-s/0.15}$  where  $s$   
1221 indicates dorsal-ventral neural tube position and ranges from 0 to 1. To avoid trivial effects  
1222 from shifts in the boundary position we set a further constraint that the bifurcation must occur  
1223 at a position  $s$  in the same range as in the neural tube network,  $0.165 \leq s \leq 0.17$ . More  
1224 specifically networks were required to be monostable below  $s = 0.165$ , with high levels of  $x_1$ ;  
1225 and bistable beyond  $s = 0.17$ , with one state having high  $x_2$  and the other high  $x_1$  (with  
1226 “high” being a concentration value above 0.6). For each network meeting these criteria, we  
1227 then proceeded to calculate the MAPs in the same way as for the neural tube network (as  
1228 explained in Supp. C), and the jump time. We selected networks that have boundaries sharper  
1229 than a certain threshold, set by requiring the boundary to be no wider than 0.2 fractional  
1230 neural tube units; boundary widths were calculated based on their transition time obtained  
1231 from simulating the SDEs. To simulate the neural tube network from (E.1) in the screen  
1232 we used the standard parameters from that network, reverting to the original version [Cohen  
1233 et al., 2014] with maximal concentrations of unity for all TFs in order to ensure comparability  
1234 with the networks produced by the screen. We removed all terms relating to  $\text{Irx3}$ , as these  
1235 do not contribute substantially to the dynamics of transitioning from a pMN to a p3 steady

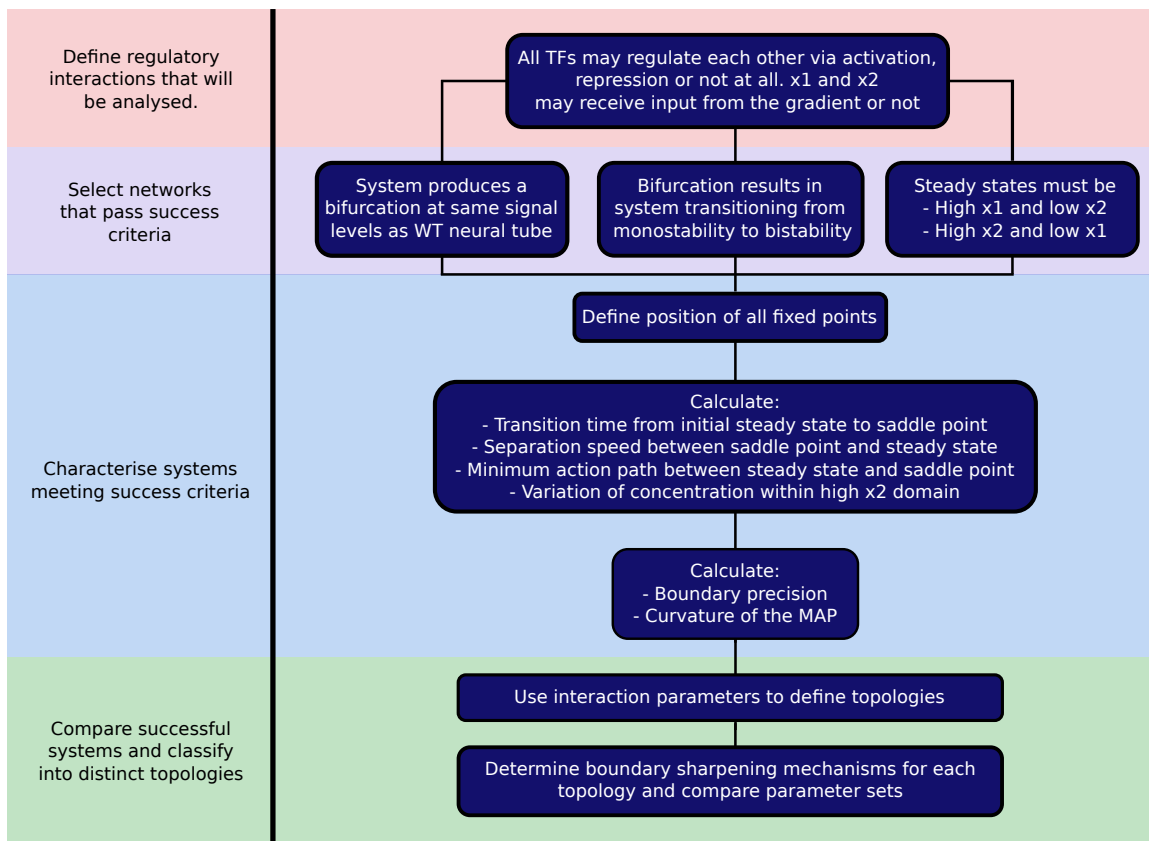

Figure S14: **Schematic of steps for systematic screening.** We designed the screen to first identify parameter sets that describe networks that generate a sharp boundary at a specific location within a gradient. This ensures that the resulting networks are comparable with each other. The parameter sets that pass this filter are then analysed by defining the characteristics relevant to forming a precise boundary. Finally, we classify the parameter sets into topologies.

1236 state. We further set production and degradation rates to be equal to unity in the screen as  
 1237 these simply scale the jump time and do not affect the results.

1238 In analysing the results of the network screen we quantified the curvature of the MAP as  
 1239 the largest perpendicular distance of any point on the MAP from the straight line between  
 1240 steady state and transition point, normalised by the total length of this line. We refer to this  
 1241 value throughout the text by the shorthand “curvature” as it gives a quantitative indication of  
 1242 how much the MAP deviates from the shortest path. The curvature was measured at  $s = 0.25$   
 1243 and the robustness of the results with respect to this choice of neural tube position was tested  
 1244 by comparing with multiple other locations, with qualitatively similar results in all cases (data  
 1245 not shown).

1246 In the analysis we also characterised networks by the strength of the contribution of the  
 1247 third node, which does not receive direct signal input. We quantified this by taking the value of  
 1248  $x_3$  at the steady state and transition point (saddle point) and multiplying each by parameters



1249 for the repression or activation of nodes 1 and 2 by node 3, taking the maximum value. The  
1250 multiplication by representative concentration levels of the third node was motivated by the  
1251 fact that when those concentrations are small, even large interaction parameter values have  
1252 small net effects.

1253 Networks with a low third node contribution are effectively two node networks, and turned  
1254 out to have low MAP curvature. This led us to explore other mechanisms for generating  
1255 sharp boundaries. Geometrically, in the space of expression levels (phase space), the speed at  
1256 which the steady state and saddle point separate as a function of neural tube position  $s$  is a  
1257 plausible contributor to boundary sharpness because even if the fluctuations around the initial  
1258 steady state favour a jump, such a jump will be inhibited by a large separation between steady  
1259 state and transition point. High separation speed should thus lead to rapidly increasing jump  
1260 times and hence to sharp boundaries. To measure separation speed we focussed on a fixed  
1261 position (chosen as  $s = 0.25$ ) along the neural tube, beyond the saddle-node bifurcation, and  
1262 calculated the Euclidean distance between steady state and transition point. We then used  
1263 this as a simple quantitative indication of separation speed. We checked the robustness of this  
1264 measure by performing the measurement for different *fixed* positions along the neural tube,  
1265 and also at *variable* locations chosen as the centre of the boundary region for each network;  
1266 we found qualitatively similar results in every case (data not shown).

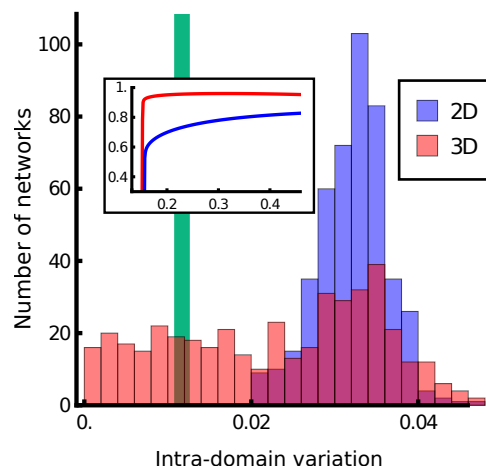

Figure S15: Histogram of variation of the expression level of the second node within its domain of expression for 3D (red) and 2D (blue) networks; inset shows example variation of expression levels across a domain. 3D networks can generate domains of expression with more constant levels of expression (lower domain variation) than 2D networks, which rely on separation speed to create sharp boundaries. Green line represents the WT network.

1267 When a network had a high separation speed, this typically resulted in the steady state (the  
1268 expression profile) of  $x_2$  varying, i.e. changing within a domain of the steady state pattern.

1269 We quantified this heterogeneity by the standard deviation of  $x_2$  within the region of high  
1270  $x_2$  expression. This confirmed (see Fig. S15) that sharp 2D networks have a higher level of  
1271 heterogeneity than 3D networks, which use the curvature of the MAP to generate sharpness.

## 1272 **Characterisation of topologies**

1273 Finally we analysed the topologies of the networks resulting from the screen. To sort networks  
1274 into topologies we used thresholds to identify whether nodes 1 and 2 receive significant signal  
1275 input, and for each of the TF nodes whether it significantly activates or represses the other  
1276 TFs. Starting with the former, within the input parameter range [10 : 400] for nodes 1 and  
1277 2, we took any parameter  $30 < k_{in}$  to be a positive input; lower values were classified as  
1278 lack of input. This cutoff was chosen by testing a range of different values and imposing the  
1279 constraints that we want to neither classify the majority of networks as having two inputs  
1280 (which would provide no information on the input topology, as could happen if the cutoff  
1281 was too low) nor assign any network to a topology with no inputs (which would not make  
1282 biological sense and would occur when the cutoff is too high). For interactions between nodes  
1283 we took into account not only the parameters  $k_{ji}$  but whether each parameter in conjunction  
1284 with the actual states of the system would have a noticeable effect. We evaluated interactions  
1285 by considering the contribution of an interaction given the highest level that the effector node  
1286 can take. Accordingly, we consider an interaction with  $0.3 < |k_{ji}| \max(x_i)$  to be significant,  
1287 otherwise we classify it as negligible. The maximum was taken over all steady states for  
1288 all neural tube positions. The cutoff value of 0.3 was chosen by systematic inspection of a  
1289 representative number of networks, for which we compared the dynamics with and without  
1290 individual interactions and assessed whether these were qualitatively identical or not. To assess  
1291 the robustness of the cutoff value, we varied it within a range up to an order of magnitude larger  
1292 and found that the results of our characterisation of network topologies remained qualitatively  
1293 the same (data not shown).

1294 With this approach we classified all the 3D network parameter sets into topologies, de-  
1295 termined those that occurred most often (Fig. S16) and plotted the boundary precisions they  
1296 generate (Fig. 5H). The results indicated that although some topologies are more frequently  
1297 represented amongst networks producing a sharp boundary, there is no single topology that  
1298 ensures sharpness. Some networks (such as 1–4 in Fig. S16) prevented the boundary from  
1299 becoming very imprecise, but even within these network topologies the range of sharpness was  
1300 large (Fig. 5G,H & Fig. S16 & Fig. S17). This leads to the conclusion that the dynamical prop-  
1301 erties generated by the network, rather than the structure of the network determines boundary

1302 precision. Indeed, we confirmed by analysing each topology separately that the main indicators  
1303 of sharpness are the two mechanisms identified in the main text: curvature of transition path  
1304 and separation speed (Fig. S17). Nonetheless, a network's topology can substantially bias the  
1305 dynamics towards high MAP curvature, and hence towards sharpness.

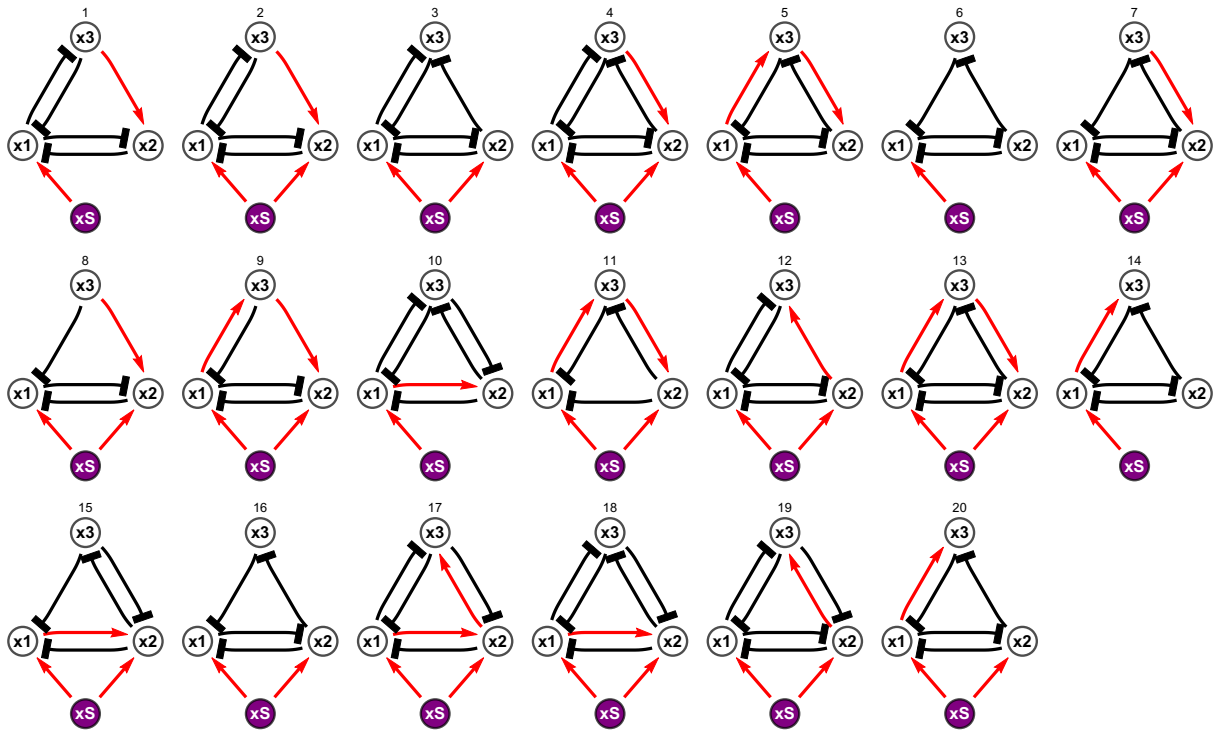

Figure S16: List of topologies that generate sharp boundaries, sorted in the same order as Fig. 5H. Red arrows indicate activation, black lines with blunt ends represent repression. Mutual repression between the first and second nodes (1 and 2) is a consistent feature, as well as the input from the signal to the first node. For the sharpest networks, a mutual repression between the first and third nodes is observed.

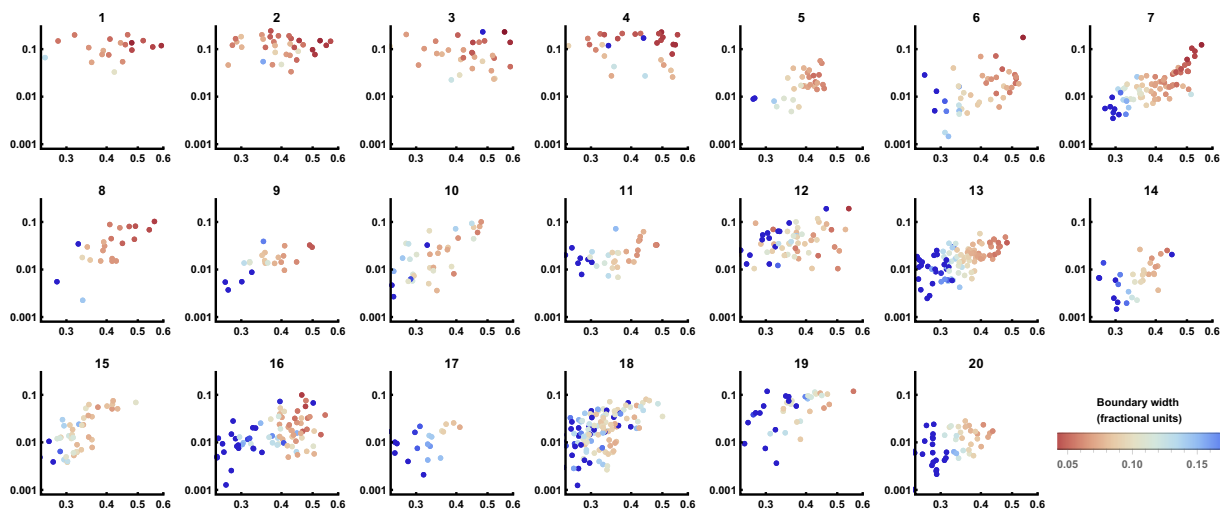

Figure S17: MAP curvature plotted against separation speed with boundary width indicated by colouring. The data are equivalent to those shown in Fig. 5D, but here each plot represents an individual network topology and networks with wide boundaries have been included in the plots (deep blue). Network topologies are ordered as in Fig. S16. While separation speed does not exhibit obvious differences between topologies, network topologies 1–4 have consistent high curvature.

## 1306 Effect of signalling noise on boundary precision

1307 We explored what effect noise in the signal gradient would have on the precision of boundaries  
 1308 generated by the mechanisms revealed in the screen. To this end, we simulated networks recovered  
 1309 from the screen using a noisy signal as an input. For this we have used Ornstein-Uhlenbeck  
 1310 noise and explored systematically a range of fluctuation timescales and noise amplitudes (see  
 1311 Eq. F.12). As is commonly done we use a log version to avoid negative values, i.e. we write  
 1312 the fluctuating signal input as  $s_{OU}(t) = \exp(\ell(t))$  where  $\ell(t)$  evolves in time as

$$d\ell(t) = \theta (\ln(s) - \ell(t)) dt + \sigma dW(t) \quad (\text{F.12})$$

$$\ell(0) = \ln(s) \quad (\text{F.13})$$

1313 The variables are the standard terms for Ornstein-Uhlenbeck processes:  $\theta$  is the inverse corre-  
 1314 lation time of fluctuations,  $\sigma$  is the noise amplitude,  $W$  is a Wiener process,  $s$  is the constant  
 1315 Gli input in the original model. We compared the boundary widths generated by simulations  
 1316 using these noisy gradients with those in which the signal was constant, for otherwise identical  
 1317 parameter sets (Fig. S18). This revealed that noise in the signal had relatively limited effects  
 1318 on the precision of boundaries for moderate levels of noise. Moreover, the same relative sharp-  
 1319 ness of boundaries for the different networks was found in the simulations with a constant and  
 1320 a noisy signal. Above a level of signal noise all sharpness was lost, as anticipated. Thus the

1321 determining factors for boundary sharpness are curvature and separation speed, as the net-  
 1322 works that maximise these two parameters produce the sharpest boundaries with or without  
 1323 signal noise (Fig. S18).

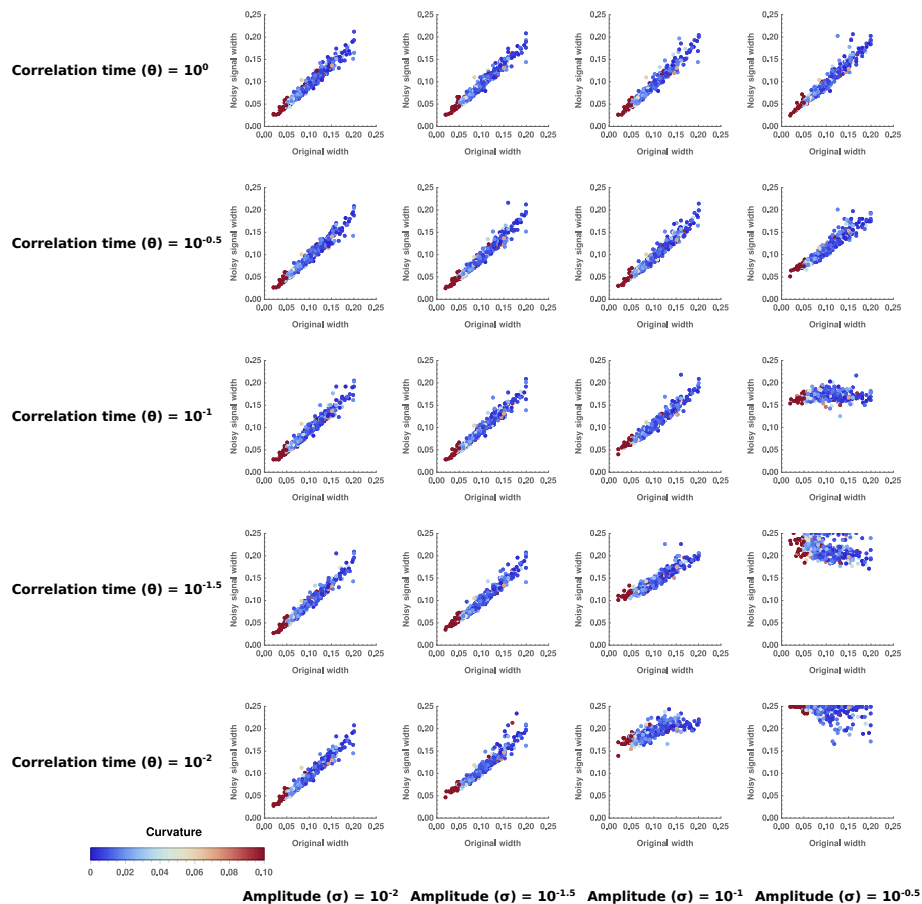

Figure S18: Effect of different levels of noise in the gradient on boundary precision. The boundary widths produced by systems recovered from the computational screen are plotted for simulations with no noise in the signal gradient ( $x$  axis) and with noise in the signal gradient ( $y$  axis). Colour labels networks from least (blue) to most (red) curvature. The behaviour of the noise in the signal has been modelled as an Ornstein-Uhlenbeck process, with the indicated amplitudes and correlation times. The same network parameter values were used for the simulations with and without signal noise. The analysis shows that the noise in the signal has relatively small effects on the precision of boundaries, except when the noise in the signal is so extreme that all sharpness is lost (bottom right plots).

1324 **Comparison with *Drosophila* GAP gene and Eye Imaginal disc net-**  
 1325 **works.**

1326 We compared the networks recovered from the computational screen with those described  
 1327 for anterior posterior patterning of the *Drosophila* embryo and eye imaginal disc [Verd et al.,  
 1328 2017, Graham et al., 2010]. Both these systems have been characterised extensively such that

1329 we have sufficient knowledge of the network to perform our analysis [Akam, 1987, Ingham,  
1330 1988, Sánchez and Thieffry, 2001, Manu et al., 2009, O'Neill et al., 1994, Rebay and Rubin,  
1331 1995]. We added intrinsic noise to the original models from [Verd et al., 2017, Graham et al.,  
1332 2010] using Langevin equations and an  $\Omega$  that was chosen to result in fluctuations without  
1333 leading to ergodicity. For the GAP gene system we used the parameters and equations as  
1334 described in [Verd et al., 2017], for the imaginal disk network we used the Mathematica code  
1335 provided as supplementary in [Graham et al., 2010]. We inspected the configurations in gene  
1336 expression fluctuations near relevant steady states.

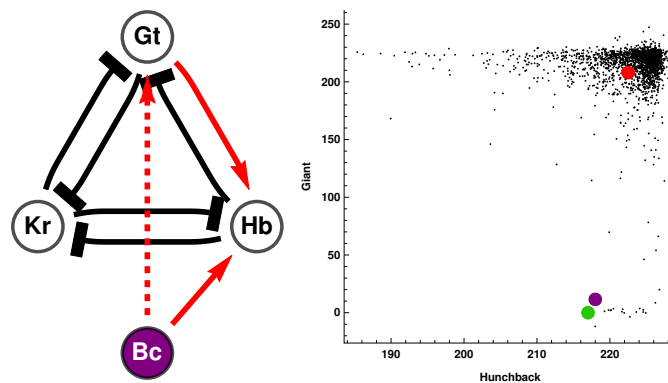

Figure S19: (Left) GAP gene network for the anterior boundary between Kruppel and Giant. The network has the same topology as the most frequently recovered network identified by our screen, with a difference only in the input (dashed link). This difference does not affect the dynamics as it only alters how the network interprets a change in signal. (Right) Black dots represent multiple simulations and illustrate fluctuations near the high-Giant / low-Kruppel steady state (red point). To transition to the low-Giant and high-Kruppel steady state (green point) the system must reach the transition point (purple point). The fluctuations in gene expression space are coerced into the Hunchback dimension ( $x$  axis), decreasing the probability of a stochastic fluctuation of the system reaching the transition point.

1337 The architecture of the transcription circuits that comprise the GAP gene network [Verd  
1338 et al., 2017] match closely those found in our computational screen (Fig. S16). As predicted by  
1339 our computational screen, we can identify role for specific links between network components  
1340 in the formation of GAP gene boundaries. In particular, for the anterior boundary between  
1341 Giant and Kruppel, if we remove Knirps, which is not expressed in either of these domains,  
1342 we find one of the most common topologies recovered from our screen, with the correspondence  
1343 Kruppel –  $x_1$ , Hunchback –  $x_2$ , Giant –  $x_3$  (Fig. S19). In this case, Hunchback and Giant  
1344 display mutual exclusivity and the graded expression profile of Giant suggests that separation  
1345 speed is used to sustain the sharp boundary; this is similar to the role played by Pax6 ( $x_3$ ) in  
1346 the neural tube GRN. An interesting difference is that while Hunchback affects the direction  
1347 of fluctuations in gene expression space, it does not change in concentration and simply alters

1348 the dynamics of the transition (Fig. S19).

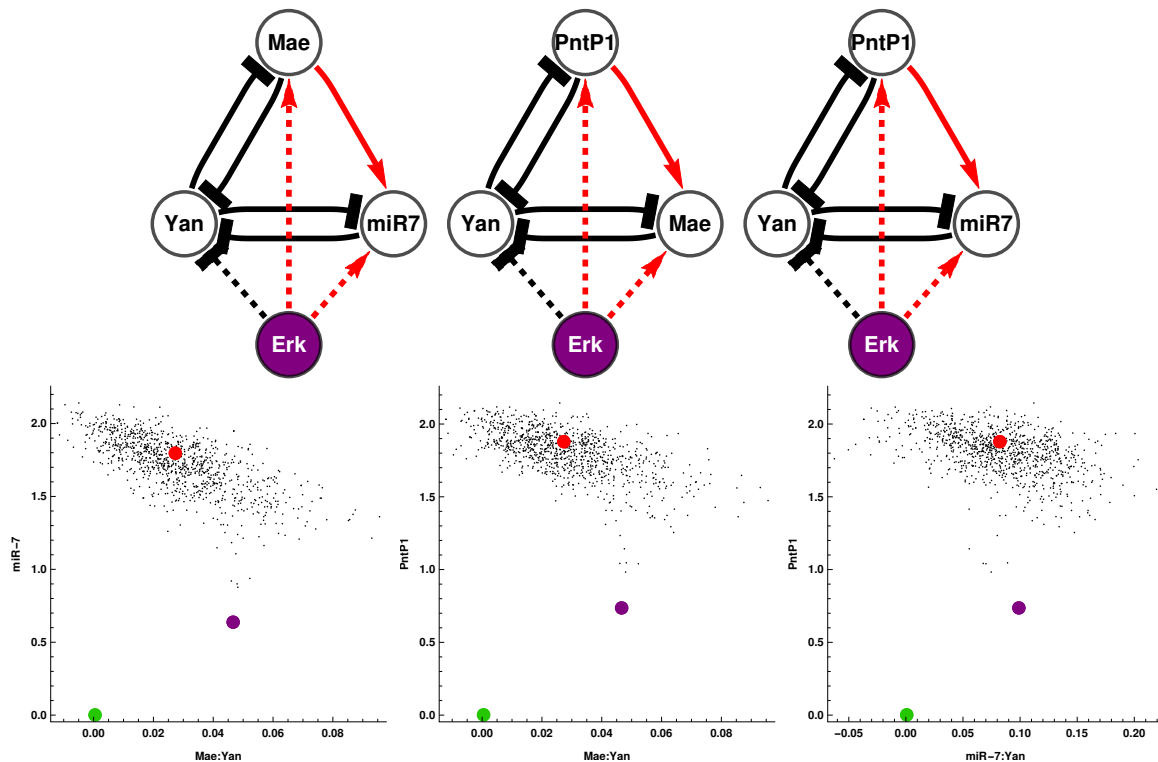

Figure S20: (Top) Multiple instances of one of the top topologies for boundary sharpness found in our computational screen are contained in the *Drosophila* eye disc network. This network is composed of several interactions and mediates the transition between Yan-on and Yan-off states. The configuration of inputs from the signal (Erk) is different to our topologies (dashed lines) but this does not affect the dynamics. (Bottom) Fluctuations near the Yan-off state (red point) for different projected views corresponding to the networks shown. The fluctuations are configured in directions that are not aligned with the transition point (purple point). This configuration decreases the possibility of a cell reverting to a Yan-on state after the wave of Erk has shifted the system to a Yan-off state. Note that for Mae and miR-7 the inhibitions of Yan happen through direct interactions, thus where noted we show the fluctuations for the variable tracking the Inhibitor:Yan complex (Mae:Yan or miR-7:Yan).

1349 The differentiation pattern of the eye imaginal disc also relies on cross-repressive interactions  
 1350 [O'Neill et al., 1994, Rebay and Rubin, 1995, Graham et al., 2010]. The expression of  
 1351 Yan, downstream of RTK signalling distinguishes between differentiated and undifferentiated  
 1352 precursors in the eye disc as the furrow migrates. We inspected the network proposed to  
 1353 achieve this [Graham et al., 2010] by focusing on three node networks that involved Yan and  
 1354 two other components in cross-repression with Yan. This approach resulted in three versions  
 1355 of a network topology found frequently as one with high curvature in our screen, with the  
 1356 mappings: (1) Yan –  $x_1$ , miR-7 –  $x_2$ , Mae –  $x_3$ , (2) Yan –  $x_1$ , Mae –  $x_2$ , PntP1 –  $x_3$  and  
 1357 (3) Yan –  $x_1$ , miR-7 –  $x_2$ , PntP1 –  $x_3$  (Fig. S20). Simulations also indicate that the dy-

1358 namics of these networks configure gene expression fluctuations to decrease the probability of  
1359 a noise driven transition (Fig. S20). The bistable network facilitates a sharp switch between  
1360 steady states, ensuring that cells only transition from a Yan-off to a Yan-on state when Yan  
1361 is sufficiently activated by Erk signalling. Once the wave of Erk has passed, the dynamical  
1362 curvature established by the network ensures that cells do not transition back to a Yan-on  
1363 state (Fig. S20). Thus both *Drosophila* embryo and eye imaginal disc networks appear to have  
1364 adopted network structures that are compatible with precision enhancing mechanisms.



## 1365 **G Materials and methods**

### 1366 **G.1 Mouse Strains**

1367 Mouse strains containing the following alleles were used: Pax6(*Sev*) [Ericson et al., 1997] and  
1368 O2e33<sup>-/-</sup> in strain backgrounds C57BL/6Jax and F1(B6xCBA) respectively. The O2e33<sup>-/-</sup>  
1369 allele was derived using zygote injection of CRISPR gRNA and Cas9 plasmids (see below).  
1370 Embryos were transferred to pseudopregnant females and subsequent pups were genotyped.  
1371 O2e33<sup>-/-</sup> mice were maintained as a heterozygous population; the line was sub-viable with  
1372 less than 2/40 homozygous offspring surviving. Embryos for analyses were collected at the  
1373 indicated time points following a mating, with the day of plug detection designated e0.5. All  
1374 animal procedures were carried out in accordance with the Animal (Scientific Procedures) Act  
1375 1986 under the Home Office project licence PPL80/2528 and PD415DD17.

### 1376 **G.2 Embryonic Stem Cell Culture**

1377 For the enhancer deletion *in vitro*, mouse ES cells containing a fluorescent reporter cotranslated  
1378 with Olig2 (Olig2::T2A-mKate2) [Sagner et al., 2018] were used. Mouse embryonic stem cells  
1379 were maintained on mitotically inactivated fibroblasts (feeder cells) in ES medium with 1,000  
1380 U/ml LIF. Cells were differentiated to spinal cord neural progenitors as previously described  
1381 [Gouti et al., 2014]. To initiate differentiation, ES cells were dissociated using 0.05% Trypsin  
1382 (Gibco) and panned in ES medium on culture plates for 2x 15 minutes to remove feeder cells.  
1383 ES cells were collected, spun down and re-suspended in N2B27 medium. 50,000 cells were  
1384 plates on 35mm CellBIND dishes (Corning). Dishes had been coated with 0.1% gelatine in  
1385 PBS before addition of 1.5ml of N2B27 with 10 ng/ml bFGF. After 48 hours medium was  
1386 replaced with N2B27 + 10ng/ml bFGF + 5uM CHIR99021 (Axon). 24 hours later, at D3,  
1387 medium was replaced with N2B27 + 100nm RA (Sigma) and 500nm SAG (Calbiochem), this  
1388 was repeated every 24 hours.

### 1389 **G.3 CRISPR/Cas9 targeting**

1390 For CRISPR/Cas9-mediated excision of the -33 kb enhancer, two pairs of short guide RNA  
1391 (sgRNA) sequences were designed to target either side of the enhancer region. ZiFit on-  
1392 line tool (<http://zifit.partners.org/>) was used to select guides that had the lowest number of  
1393 potential off target sites. sgRNA sequences (ACTTTGTAAGCCGAGCC) and (GATAATCGC-  
1394 CTCCCTCC) were cloned into pX459 v2.0 (Addgene, [Ran et al., 2013]) and transfected into  
1395 ES cells via nucleofection. This generated a cell line with a 995bp deletion (chr16: 91192464-

1396 91193458). Two separate clones were analysed to determine whether there was substantial  
1397 clonal variation. A second line was generated with a larger deletion of approximately 3.3kb  
1398 using sgRNA sequences (GTTTATGGCTCATCCCC and TCCAGGCTCCCATATCC). Cell lines  
1399 with this larger deletion yielded the same results as the smaller deletion (data not shown). To  
1400 generate the mouse line, plasmids encoding the sgRNAs for the 3.3kb deletion were injected  
1401 into zygotes before being transferred to pseudo-pregnant females. The mouse line generated  
1402 had a 3259 bp deletion (chr16: 91191295-91194570).

1403 To assess Olig2 protein copy number, a transgenic cell line was constructed, Olig2-HA-  
1404 SnapTag. Sequencing encoding an HA tagged SnapTag was placed at the C-terminus of  
1405 the endogenous coding sequence for Olig2 via homologous recombination using CRISPR. The  
1406 SnapTag sequence was extracted from the pSNAPf vector (N9183S, NEB) and inserted into  
1407 a plasmid containing Olig2 [Sagner et al., 2018] and targeted as previously described.

#### 1408 **G.4 Protein Copy Number Quantification**

1409 The concentration of recombinant proteins (used as standards) was calculated from Coomassie  
1410 staining (GelCode Blue Stain Reagent, Thermo scientific). Recombinant proteins used were  
1411 Pax6 (Bioclone, PI-0099) Nkx2.2 (MyBioSource, MBS717917) and SnapTag (NEB, P9312S).  
1412 A solution of 5  $\hat{\text{ijm}}$  SNAP-tag was labelled with Janelia Fluor JF549 (TOCRIS, 6147) SnapTag  
1413 Ligand at 10  $\hat{\text{ijm}}$  (assembled in house) for 30 mins at 37 $\hat{\text{A}}\text{rC}$ .

1414 To determine Pax6 and Nkx2.2 average molecule number per cell, a WT HM1 mouse  
1415 embryonic stem cell line was used [Doetschman et al., 1987]. Cells were lysed in RIPA buffer  
1416 supplemented with protease inhibitors. The cell lysates were analysed by Western blot, with  
1417 lysate from a known number of cells loaded per lane. The following antibodies were used:  
1418 rabbit anti-Pax6 (Millipore AB2237, 1:2000), mouse anti-Nkx2.2 (DSHB 745A5, 1:50), donkey  
1419 anti-mouse IRDye 800CW (Licor) and donkey anti-rabbit IRDye 680RD (Licor). Blots were  
1420 scanned using an Odyssey Scanner (Licor).

1421 We used the cell line Olig2-HA-SnapTag to determine protein copy number for Olig2.  
1422 Cells for Olig2 and Nkx2.2 copy numbers were differentiated as described. For Pax6, cells  
1423 were exposed to 100nm RA only from day 4 to induce a more dorsal spinal cord cell fate.  
1424 One day prior to sample collection, the cells were incubated with Janelia Fluor JF549 SnapTag  
1425 Ligand (assembled in house) directly in the media at 1  $\mu\text{M}$  overnight. Cells were lysed in RIPA  
1426 buffer supplemented with protease inhibitors. A known number of cells were loaded per lane.  
1427 Gels were scanned using Typhoon FLA 9500.

1428 To determine the percentage of expressing cells, flow cytometry was carried out as described

1429 in the Flow Cytometry section.

## 1430 **G.5 Flow Cytometry Analysis**

1431 Cells were dissociated using 0.05% Trypsin and collected in ES media. Cells were then washed  
1432 in PBS and resuspended in PBS containing live-cell Calcein Violet dye (Life Technologies).  
1433 Control and O2e33<sup>-/-</sup> cells were differentiated in parallel and analysed together. Control cells  
1434 differentiated without SAG from day 4 were used to set population gates for mKate positive  
1435 cells.

1436 For protein quantifications, flow cytometry was used to determine percentage of cells  
1437 expressing Olig2, Pax6 and Nkx2.2. Cells were labelled with either PE Mouse anti-Nkx2.2  
1438 (BD Pharmingen 564730, 1:20); AlexaFluor 647 mouse anti-Human Pax6 (BD Pharmingen  
1439 562249, 1:50); goat anti-Olig2 (R&D Systems AF2418, 1:800) then donkey anti-goat 405  
1440 (Biotium 20398, 1:500). Flow analysis was performed using a Becton Dickinson LSRII flow  
1441 cytometer.

## 1442 **G.6 qPCR assays**

1443 The mRNA was extracted using RNeasy Mini Kit (Qiagen) according to the manufacturer's  
1444 instructions. 1  $\mu$ g of RNA was used for reverse transcription reaction using SuperScript  
1445 III (Invitrogen) with random hexamers. Platinum SYBR Green qPCR SuperMix-UDG with  
1446 ROX (Invitrogen) was used for amplification on a QuantStudio 5 Real-Time PCR system  
1447 (ThermoFisher Scientific). Expression values were normalised against  $\beta$ -actin. Two repeats  
1448 of four (Islet1) samples at each timepoint were analysed. qPCR primers used were Islet1 FWD:  
1449 5'-TATCAGGTTGTACGGGATCAAA and REV:5'-CTACACAGCGGAAACTCG.

## 1450 **G.7 Immunohistochemistry and Microscopy**

1451 Embryos were collected at defined timepoints and fixed for 30 minutes for e8.5, 1 hour for e9.5  
1452 and 2 hours for e10.5 in 4% paraformaldehyde in PBS. Embryos for wholemount imaging were  
1453 washed in PBS containing 0.1% Triton X-100 (PBST) before addition of primary antibodies.  
1454 Embryos for sectioning were placed in cryopreservation 30% sucrose overnight at 4°C then  
1455 dissected into forelimb neural tube fragments. These were mounted in gelatine then frozen.  
1456 12 $\mu$ m sections were collected on glass slides using Zeiss Hyrax C 60R cryostat. Gelatine was  
1457 removed from the slides by 4 x 5 min washes in PBS at 42°C and sections washed with  
1458 PBST. For *in vitro* stainings, cells were washed in PBS and fixed in 4% paraformaldehyde  
1459 for 15 min at 4°C then washed in PBS then PBST. For whole embryos, embryo sections

1460 and cells, primary antibodies diluted in blocking solution (1% BSA in PBST) were applied  
1461 overnight at 4°C. These were then washed in 3 x PBST before secondary antibodies diluted  
1462 in PBST were added for 1 hour at room temperature. Secondary antibodies were removed  
1463 with 3 x washes with PBST and one wash containing PBST and DAPI. Sections and cells  
1464 were mounted using Prolong Gold (Invitrogen). Embryos for wholemount were mounted us-  
1465 ing glycerol. Primary antibodies used were guinea pig anti-Olig2 (gift from Bennett Novitch,  
1466 1:8000 [Novitch et al., 2001]); mouse anti-Nkx2.2 (BD Pharmingen 564731, 1:500); rab-  
1467 bit anti-Pax6 (Millipore AB2237, 1:1000); goat anti-Sox2 (R&D Systems AF2018, 1:200);  
1468 mouse anti-Mnx1/HB9 (DSHB 81.5C10, 1:40); rabbit anti-Olig2 (Millipore AB9610, 1:1000);  
1469 goat anti-ISL1 (R&D Systems AF1837, 1:1000); mouse anti-Chx10 (Santa Cruz, sc-365519,  
1470 1:100). All secondary antibodies were raised in donkey and conjugated to Alexa488, Alexa568,  
1471 Alexa647 (Abcam).

1472 Cells were imaged on a Zeiss Imager.Z2 microscope using 20x objective. Z-stacks were taken  
1473 and presented as a maximum projection using FiJi imaging software. A Leica SP5 upright  
1474 confocal microscope was used to image embryo sections (40x oil objective) and whole embryos  
1475 (20x dry objective). For Fig.2I, images were acquired using a Leica Sp8 inverted confocal (20x  
1476 dry objective). For whole embryos, z-stacks were taken across a tile-scan then assembled and  
1477 maximally projected using FiJi imaging software.

## 1478 **G.8 Image quantification**

### 1479 **Fluorescent intensity measurements**

1480 Single optical planes from confocal z-stack images were used for analysis. Each nucleus was  
1481 identified individually using the FiJi point tool. The DAPI channel was used as reference for  
1482 the position of the nuclei regardless of TF expression. A circle of 2  $\mu\text{m}$  radius was taken  
1483 around each point,  $x$  and  $y$  position and mean fluorescence intensity values for Nkx2.2, Olig2  
1484 and Pax6 were recorded. Reference points at the ventral and dorsal pole of the neural tube in  
1485 each section were recorded in order to align all embryos along the dorso-ventral axis.

### 1486 **Pre-processing**

1487 We performed a set of normalisation steps in order to compare embryos from different batches  
1488 and across phenotypes:

- 1489 1. The datasets were realigned vertically with respect to the reference points and the  
1490 ventral-most point was set to (0,0) in axes coordinates

- 1491 2. Cells with DAPI levels below two SDs from the mean were removed to eliminate falsely  
1492 identified nuclei. This value was decided individually for each sample to account for  
1493 different background levels resulting from technical noise.
- 1494 3. Points that were very low in intensity (below two SDs) were set to a minimum threshold  
1495 in each individual channel.
- 1496 4. For Nkx2.2 and Olig2, the intensity values were re-scaled such that the minimum value  
1497 is at 0 and the 40% quantile is at the arbitrary value of 0.08. This was done individually  
1498 for each embryo with the assumption that most nuclei in a full neural tube cross-section  
1499 will not express these proteins.
- 1500 5. For Pax6, most nuclei in the image express some level of Pax6; accordingly we set the  
1501 60% quantile at 0.6 across all datasets.

## 1502 **Staging embryos with size**

1503 We used the dorsal-ventral length of the neural tube as a proxy for embryo age [Cohen et al.,  
1504 2015]. For e9.5 embryos, the neural tube size measured was between 250 $\mu\text{m}$  and 350 $\mu\text{m}$  and  
1505 for e10.5 embryos it was larger than 350 $\mu\text{m}$ . In order to subgroup e9.5 embryos, neural tube  
1506 size was used. In total we have 46 WT, 29 O2e33<sup>-/-</sup> and 16 Pax6<sup>-/-</sup>. By sizes they are  
1507 distributed as:

|                              | WT | O2e33 <sup>-/-</sup> | Pax6 <sup>-/-</sup> |
|------------------------------|----|----------------------|---------------------|
| 1508 150 - 250 $\mu\text{m}$ | 17 | 5                    | 5                   |
| 250 - 350 $\mu\text{m}$      | 13 | 13                   | 3                   |
| 350 - $\mu\text{m}$          | 16 | 11                   | 8                   |

## 1509 **Classification into cell types**

1510 In order to analyse the heterogeneity at the boundary between domains, we classified all cells  
1511 into one of 5 specific cell types: floor plate, p3, pMN, Irx3 positive, other; this was done based  
1512 on the position and expression profile of each cell. We refrained from using the Pax6 channel in  
1513 our classifier to avoid any bias in the classification of Pax6<sup>-/-</sup> embryos. We therefore classified  
1514 based on three parameters: Nkx2.2 intensity, Olig2 intensity and dorsal-ventral position. The  
1515 thresholds we employed for Nkx2.2 and Olig2 concentrations are shown in Fig. S21A-B. There  
1516 was a further constraint on the dorsal-ventral position for each cell type, in order to avoid  
1517 anomalies from blood vessels and imaging artefacts and to be able to separate floor plate  
1518 cells from Irx3 positive cells, both of which lack expression of Nkx2.2 and Olig2 (Fig. S21B-  
1519 C). Manually bench-marking this method indicated that we were able to classify most cells

1520 accurately for all three phenotypes. The classifier becomes less accurate for cells in dorsal  
1521 regions but this is of no concern as our subsequent analysis did not involve these cells. For the  
1522 specific task of quantifying the Olig2-Irx3 boundary position we employed the Pax6 channel  
1523 as a further parameter to aid classification. This was only performed for WT and O2e33<sup>-/-</sup>  
1524 (data not shown).

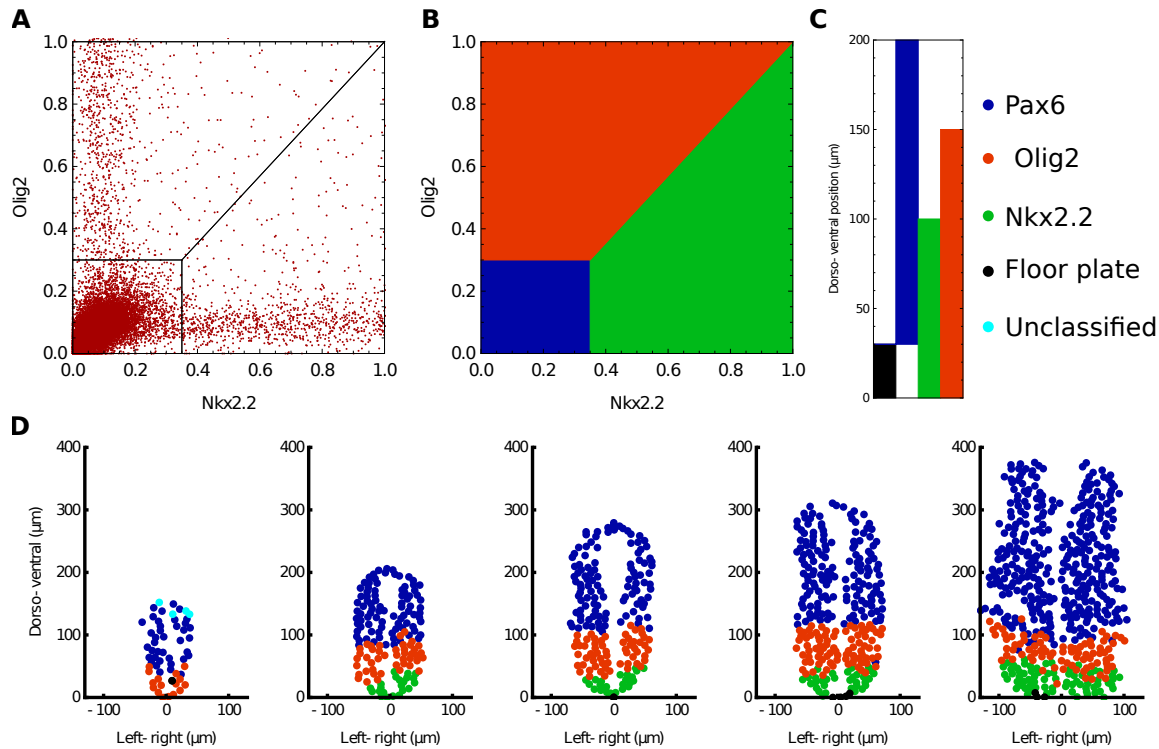

Figure S21: **Analysis of gene expression in embryos**(A) Plot illustrating the concentrations of Nkx2.2 and Olig2 for all cells analysed. This highlights that the majority of cells are negative for both TFs and also that very few cells co-express both TFs. (B) Criteria to determine the identity of each cell by using the levels of Nkx2.2 and Olig2; colours indicating cell assignment as Olig2 (red), Nkx2.2 (green) and neither (blue) are consistent throughout the figure. The concentration of Pax6 is not used for classification. (C) Positional limits along the neural tube for each cell type. Cells that express neither Olig2 nor Nkx2.2 are classified based on their position as they can be ventral floor plate cells (black) or more dorsal progenitors. Cells that have mismatching values of concentration and position are classified as exceptions in Cyan (D) Examples of classified embryos of increasing age, illustrating the accuracy of the approach for determining cell type.

## 1525 Defining boundary position and width

1526 Once the cell types had been classified we assigned a quantitative measure of the width of gene  
1527 expression boundaries. For this we fit to the cell position data, for each embryo, a smooth  
1528 function indicating the probability of finding a cell of one type (the prevalent type on one

1529 side of the boundary) at each location of the image. We focused on the boundary between  
1530 p3 and pMN domains. The classifier is then binary and gives the probability of finding a p3  
1531 cell at each image location. We used a Gaussian process approach to fit this classifier as  
1532 detailed in [Rasmussen and Williams, 2004], using public MATLAB code (MATLAB version  
1533 r2018b). The Gaussian process was chosen to have a constant mean function and a squared  
1534 exponential covariance function. This choice of covariance function is relatively standard and  
1535 allows us in particular to assign separate covariance function lengthscales in the  $x$  and  $y$  image  
1536 directions by automatic relevance determination [Rasmussen and Williams, 2004]. We used a  
1537 logistic transfer function to convert Gaussian process values to probabilities, again a standard  
1538 choice. Once the classification probabilities have been obtained in this way, we define the  
1539 boundary as the region where the probability of p3 cells lies in the range 11% to 89%, i.e.  
1540 where there is significant mixing of cell types. We then determine the width of this region  
1541 geometrically. This method allowed us to calculate the boundary widths for all embryos in a  
1542 consistent manner, and to compare WT with mutants. The boundary region is determined from  
1543 the trained classifier for each embryo as explained above; the position where the classification  
1544 probability is 50% for either cell type is used to define the position of the boundary (an average  
1545 position of the boundary along the left-right axis) (Fig. S22). We do not use entropy based  
1546 measures such as in [Dubuis et al., 2013, Petkova et al., 2019] as these typically rely on the  
1547 assumption of Gaussian gene expression level distributions; this assumption is inapplicable in  
1548 the boundary region, where the system is bistable and the distributions therefore bimodal.  
1549 Information theoretical methods are also normally used with a single spatial coordinate while  
1550 we are looking at a 2D tissue. This may have irregular growth or oblique sectioning which  
1551 could lead to a slanted boundary and therefore misleading results once projected onto a single  
1552 dimension.

### 1553 **Quantifying TF levels**

1554 We extracted Olig2 positive cells that were classified as being within the boundary region.  
1555 The model predicted that these cells were the most likely to transition to a Nkx2.2 positive  
1556 state, given sufficient time. We quantify the levels of Pax6 and Olig2 for these cells in  
1557 WT and O2e33<sup>-/-</sup> mutants. The resulting measurements do not provide absolute numbers;  
1558 but given that all samples are normalised in the same way, as described (Sec. G.8), the  
1559 resulting measurements are comparable relative to each other. We use these measurements  
1560 as equivalents to observing fluctuations around a steady state over a series of dorso-ventral  
1561 positions. In this way, we take the corresponding equivalent in the simulations, where we also

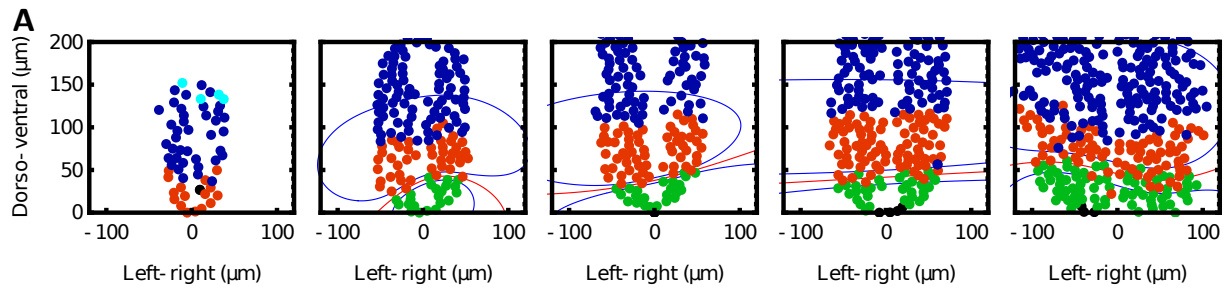

Figure S22: **Examples of boundaries determined by the Gaussian process classifier.** The red lines indicate the computed boundary position, and correspond to the image locations where the probability of being a p3 or pMN cell is 0.5. Blue lines close to the p3-pMN boundary delimit the area identified as the boundary region, where the probability of being a p3 cell is in the range 11% to 89%. By measuring the area between the two blue curves and dividing by the width of the embryo we are able to quantify the width of the boundaries. In turn by obtaining the average position of the red line, we are able to calculate the boundary position.

1562 average fluctuations across several neural tube positions (Supp. C).

### 1563 **Calculating variance levels**

1564 In order to calculate the total variance of Olig2 and Pax6 levels within the pMN domain we  
1565 extracted all Olig2 expressing cells, for both WT and  $O2e33^{-/-}$ , outside the boundary region.  
1566 The variances and covariances of the normalised fluorescence intensity values were calculated,  
1567 in analogy with the theoretical approach (Supp. C). The square root of the trace of the  
1568 resulting covariance matrices was then used to obtain the typical root-mean-square relative  
1569 variance.
